# Supplementary material for: Acceleration of the thermal back-reaction and the finding of a non-photochromic isomer for a negative photochromic binaphthyl-bridged imidazole dimer
Source: Royal Society of Chemistry journal article supplement (doi:10.1039/d2cc06942c), 2023-01-01
Supplement: d2cc06942c2.pdf [file d2cc06942c2.pdf]

## Supporting Information for:

# Acceleration of Thermal Back-Reaction and Finding of Non-Photochromic Isomer for Negative Photochromic Binaphthyl-Bridged Imidazole Dimer

**Katsuya Mutoh,<sup>a,b</sup> Natsuho Moriyama<sup>a</sup> and Jiro Abe<sup>a\*</sup>**

*a. Department of Chemistry and Biological Science, College of Science and Engineering, Aoyama Gakuin University, 5-10-1 Fuchinobe, Chuo-ku, Sagamihara, Kanagawa 252-5258, Japan.*

*b. Present address: Department of Chemistry, Graduate School of Science, Osaka Metropolitan University, 3-3-138 Sugimoto, Sumiyoshi-ku, Osaka 558-8585, Japan*

*E-mail: jiro\_abe@chem.aoyama.ac.jp; Tel: +81-42-759-6225*

## CONTENTS

|                                                                   |            |
|-------------------------------------------------------------------|------------|
| <b>1. Syntheses</b>                                               | <b>S2</b>  |
| <b>2. NMR Spectra</b>                                             | <b>S6</b>  |
| <b>3. HR-ESI-TOF MS Spectra</b>                                   | <b>S16</b> |
| <b>4. HPLC Chromatograms</b>                                      | <b>S19</b> |
| <b>5. X-ray Crystallographic Analyses</b>                         | <b>S20</b> |
| <b>6. Transient Absorption Spectroscopy</b>                       | <b>S23</b> |
| <b>7. Laser Flash Photolysis Measurement</b>                      | <b>S23</b> |
| <b>8. Determination of Conversion Efficiency of 5MR</b>           | <b>S24</b> |
| <b>9. Measurement for Conversion Efficiency to 8MR of 2 and 4</b> | <b>S25</b> |
| <b>10. Fatigue Resistance of 3</b>                                | <b>S26</b> |
| <b>11. DFT Calculations</b>                                       | <b>S27</b> |
| <b>12. References</b>                                             | <b>S50</b> |

## 1. Syntheses

All reactions were monitored by thin-layer chromatography carried out on 0.2 mm E. Merck silica gel plates (60F-254). Column chromatography was performed on silica gel (Silica gel 60N, Kanto Chemical).  $^1\text{H}$  NMR spectra were recorded at 400 MHz on a Bruker AVANCE III 400 NanoBay.  $\text{CDCl}_3$ ,  $\text{THF-}d_8$  and  $\text{DMSO-}d_6$  were used as deuterated solvents. ESI-TOF-MS and APCI-TOF-MS spectra were recorded on a Bruker micrOTOF II-AGA1. All glassware was washed with distilled water and dried. Unless otherwise noted, all reagents and reaction solvents were purchased from TCI, Wako Co. Ltd., Aldrich Chemical Co., Inc. and Kanto Chemical Co., Inc. and were used without further purification.

Scheme S1 Synthetic Scheme of **1**, **2**, **3**, and **4**.

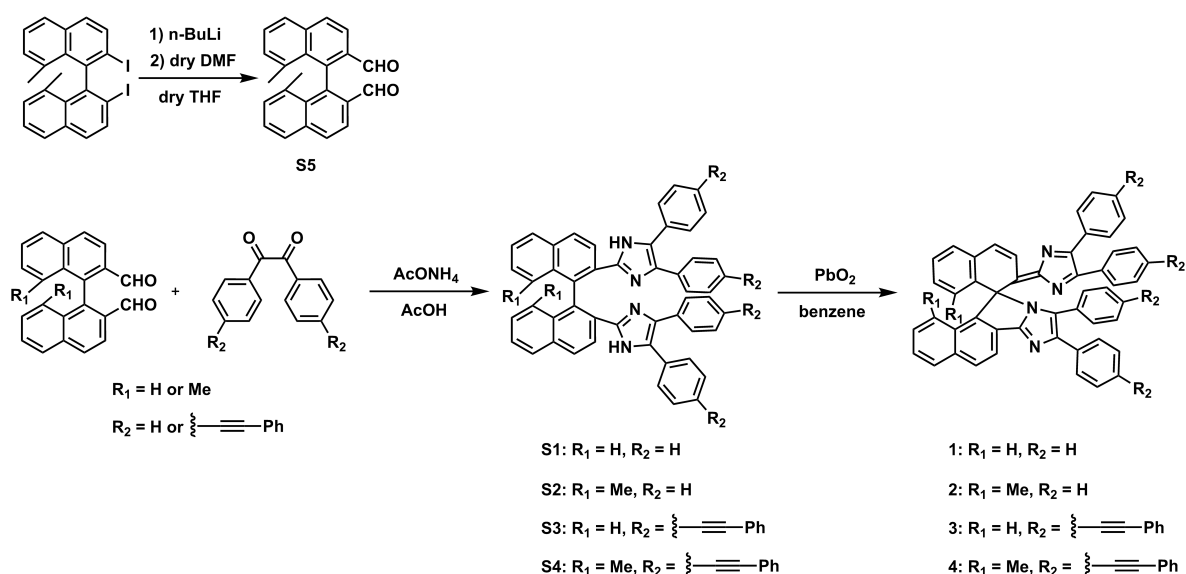

2,2'-diiodo-8,8'-dimethyl-1,1'-binaphthalene was synthesized according to the literature.<sup>S1</sup>

[1,1'-binaphthalene]-2,2'-dicarbaldehyde was synthesized according to the literature.<sup>S2</sup>

1,2-bis(4-(phenylethynyl)phenyl)ethane-1,2-dione was synthesized according to the literature.<sup>S3</sup>

### 8,8'-Dimethyl-[1,1'-binaphthalene]-2,2'-dicarbaldehyde (S5)

A solution of 2,2'-diiodo-8,8'-dimethyl-1,1'-binaphthalene (80 mg, 0.15 mmol) in dry THF (4 mL) was cooled to  $-78$  °C. The solution was dropwise added n-BuLi (1.59 M, 0.288 mL, 0.456 mmol) at  $-78$  °C and stirred for 5 min. The mixture was added dropwise dry DMF (0.060 mL, 0.78 mmol) and the solution was stirred at 0 °C for 3 h. The mixture was quenched with sat.  $\text{NH}_4\text{Cl}$  aq. at 0 °C, and extracted with  $\text{CH}_2\text{Cl}_2$ . The organic layer was washed with water and brine, and passed through a phase separator paper. The residue was separated by PTLC (hexane: $\text{CH}_2\text{Cl}_2$  = 1:2) to give the desired product as a white solid (30 mg, 59%).  $^1\text{H}$  NMR (400 MHz,  $\text{CDCl}_3$ )  $\delta$ : 9.29 (s, 2H), 8.08 (s, 4H), 7.88 (d,  $J$  = 8.0 Hz, 2H), 7.55 (t,  $J$  = 8.0 Hz, 2H), 7.31 (d,  $J$  = 8.0 Hz, 2H), 1.77 (s, 6H).  $^{13}\text{C}$  NMR (100 MHz,  $\text{CDCl}_3$ )  $\delta$ : 191.4, 142.3, 137.5, 136.9, 134.7, 132.9, 132.1, 131.1, 129.2, 128.3, 121.6, 24.4. HRMS (APCI-TOF): calculated for  $\text{C}_{24}\text{H}_{18}\text{O}_2$   $[\text{M}+\text{H}]^+$ : 339.1380, found: 339.1366.

### Compound S1

A solution of [1,1'-binaphthalene]-2,2'-dicarbaldehyde (32 mg, 0.10 mmol), benzil (50 mg, 0.24 mmol), ammonium acetate (240 mg, 3.1 mmol) in AcOH (5 mL) was stirred at 110 °C for 21 h. The mixture was neutralized with NH<sub>3</sub> aq. at 0 °C, and extracted with AcOEt. The organic layer was washed with water and brine, and passed through a phase separator paper. The residue was separated by silica gel column chromatography (hexane:AcOEt = 3:2) to give the desired product as a pale yellow solid (55 mg, 77%). <sup>1</sup>H NMR (400 MHz, DMSO-*d*<sub>6</sub>) δ: 14.0 (s, 2H), 8.19 (d, *J* = 8.0 Hz, 2H), 8.03 (d, *J* = 8.0 Hz, 2H), 8.02 (d, *J* = 8.8 Hz, 2H), 7.48 (t, *J* = 8.0 Hz, 2H), 7.30–7.13 (m, 22H), 6.93 (d, *J* = 8.4 Hz, 2H). <sup>13</sup>C NMR (100 MHz, CDCl<sub>3</sub>) δ: 144.6, 133.6, 132.7, 132.0, 129.3, 128.4, 128.3, 128.2, 128.0, 127.4, 127.3, 127.0, 126.1. HRMS (ESI-TOF): calculated for C<sub>50</sub>H<sub>34</sub>N<sub>4</sub> [M+H]<sup>+</sup>: 691.2856, found: 691.2869.

### Compound 1

A solution of K<sub>3</sub>[Fe(CN)<sub>6</sub>] (1300 mg, 4.0 mmol) and KOH (450 mg, 8.0 mmol) in water (20 mL) was degassed by N<sub>2</sub> bubbling and was added to a solution of **S1** (55 mg, 0.080 mmol) in benzene (40 mL) degassed by N<sub>2</sub> bubbling. The mixture was stirred for 8 h at room temperature in the dark, and extracted with AcOEt. The organic layer was washed with water and brine, and passed through a phase separator paper. After the removal of the solvents, the crude mixture was purified by recrystallization from AcOEt/hexane to give the desired product as a red crystal (30 mg, 55%). <sup>1</sup>H NMR (400 MHz, THF-*d*<sub>8</sub>) δ: 8.12 (d, *J* = 8.4 Hz, 1H), 7.94 (d, *J* = 10.0 Hz, 1H), 7.93 (d, *J* = 8.4 Hz, 1H), 7.81 (d, *J* = 8.4 Hz, 1H), 7.64–7.62 (m, 2H), 7.51–7.47 (m, 5H), 7.38–7.24 (m, 9H), 7.22–7.08 (m, 5H), 7.05 (d, *J* = 8.4 Hz, 1H), 7.02–6.95 (m, 4H), 6.56–6.54 (m, 2H). <sup>13</sup>C NMR (100 MHz, CDCl<sub>3</sub>) δ: 165.0, 164.9, 162.4, 153.6, 151.9, 142.0, 140.1, 137.2, 135.2, 133.9, 133.7, 133.6, 132.2, 131.5, 130.6, 130.4, 130.13, 130.11, 130.00, 129.96, 129.9, 129.24, 129.21, 128.7, 128.3, 128.2, 128.1, 128.0, 127.6, 127.5, 127.3, 127.0, 126.7, 126.12, 126.10, 125.6, 122.5, 118.3, 66.4. HRMS (ESI-TOF): calculated for C<sub>50</sub>H<sub>32</sub>N<sub>4</sub> [M+H]<sup>+</sup>: 689.2700, found: 689.2727.

### Compound S2

A solution of 8,8'-dimethyl-[1,1'-binaphthalene]-2,2'-dicarbaldehyde (10 mg, 0.030 mmol), benzil (25 mg, 0.120 mmol), ammonium acetate (45 mg, 0.58 mmol) in AcOH (1 mL) was stirred at 110 °C for 27 h. The mixture was neutralized with NH<sub>3</sub> aq. at 0 °C, and extracted with CH<sub>2</sub>Cl<sub>2</sub>. The organic layer was washed with water and brine, and passed through a phase separator paper. The residue was separated by PTLC (hexane:AcOEt = 3:1) to give the desired product as a pale yellow solid (13 mg, 61%). <sup>1</sup>H NMR (400 MHz, DMSO-*d*<sub>6</sub>) δ: 12.9 (s, 2H), 8.06 (d, *J* = 8.0 Hz, 2H), 7.87 (d, *J* = 8.0 Hz, 2H), 7.75 (d, *J* = 8.0 Hz, 2H), 7.38 (t, *J* = 8.0 Hz, 2H), 7.30–7.20 (m, 8H), 7.12–7.08 (m, 14H), 1.79 (s, 6H). <sup>13</sup>C NMR (100 MHz, CDCl<sub>3</sub>) δ: 144.7, 137.3, 136.3, 135.4, 134.6, 134.5, 132.7, 132.2, 130.6, 130.2, 129.8, 128.5, 128.2, 128.1, 127.7, 127.5, 127.2, 126.9, 126.8, 24.6. HRMS (APCI-TOF): calculated for C<sub>52</sub>H<sub>38</sub>N<sub>4</sub> [M+H]<sup>+</sup>: 719.3169, found: 719.3167.

### Compound 2

A solution of **S2** (10 mg, 0.014 mmol), PbO<sub>2</sub> (50 mg) in benzene (0.5 mL) was stirred at r.t. for 2 h. The mixture was filtered with celite and the solvent was removed by evaporation. The red solid was further purified by recrystallization from CH<sub>2</sub>Cl<sub>2</sub>/hexane to give the desired product as a red crystal (5 mg, 50%). <sup>1</sup>H NMR (400 MHz, THF-*d*<sub>8</sub>) δ: 8.17 (d, *J* = 8.0 Hz, 1H), 8.08 (d, *J* = 8.0 Hz, 1H), 8.04 (d, *J* = 9.6 Hz, 1H), 7.71 (d, *J* = 8.0 Hz, 1H), 7.55–7.53 (m, 2H), 7.49–7.47 (m, 2H), 7.39–7.36 (m, 3H), 7.33–7.18 (m, 7H), 7.13–7.07 (m, 3H), 7.02–6.91 (m, 6H), 6.60–6.54 (m, 3H), 2.25 (s, 3H), 1.39 (s, 3H). <sup>13</sup>C NMR (100 MHz, CDCl<sub>3</sub>) δ: 164.7, 164.0, 161.9, 152.9, 147.6, 142.2, 142.1, 138.4, 135.7, 135.4, 135.1, 135.0, 134.5, 134.2, 133.7, 133.6, 132.4, 131.6, 130.2, 130.15, 130.05,

129.92, 129.89, 129.3, 128.68, 128.65, 128.56, 128.24, 128.17, 128.0, 127.8, 126.7, 126.5, 126.3, 126.0, 124.7, 118.0, 69.6, 22.1, 21.4. HRMS (ESI-TOF): calculated for  $C_{52}H_{36}N_4$   $[M+H]^+$ : 717.3013, found: 717.2998.

### Compound S3

A solution of [1,1'-binaphthalene]-2,2'-dicarbaldehyde (15 mg, 0.048 mmol), 1,2-bis(4-(phenylethynyl)phenyl)ethane-1,2-dione (55 mg, 0.13 mmol), ammonium acetate (58 mg, 0.75 mmol) in AcOH (2 mL) and  $CHCl_3$  (0.5 mL) was sealed and stirred at 110 °C for 18 h. The mixture was neutralized with  $NH_3$  aq. at 0 °C, and extracted with  $CH_2Cl_2$ . The organic layer was washed with water and brine, and passed through a phase separator paper. The residue was separated by PTLC twice (hexane:AcOEt = 3:1, and then hexane: $CH_2Cl_2$ :AcOEt = 20:80:1) to give the desired product as a yellow solid (27 mg, 51%).  $^1H$  NMR (400 MHz,  $CDCl_3$ )  $\delta$ : 8.76 (br, 2H), 8.72 (d,  $J$  = 8.0 Hz, 2H), 8.22 (d,  $J$  = 8.0 Hz, 2H), 8.06 (d,  $J$  = 8.0 Hz, 2H), 7.60–7.49 (m, 14H), 7.43–7.31 (m, 24H), 6.75 (d,  $J$  = 8.0 Hz, 4H).  $^{13}C$  NMR (100 MHz,  $CDCl_3$ )  $\delta$ : 145.2, 134.2, 133.7, 132.7, 132.1, 131.9, 131.64, 131.60, 131.58, 129.7, 129.5, 129.2, 129.0, 128.4, 128.3, 128.2, 128.0, 127.9, 127.6, 127.0, 126.6, 126.1, 123.3, 123.0, 122.6, 121.9, 90.7, 89.9, 89.6, 88.9. HRMS (ESI-TOF): calculated for  $C_{82}H_{50}N_4$   $[M+H]^+$ : 1091.4108, found: 1091.4108.

### Compound 3

A solution of **S3** (13 mg, 0.012 mmol),  $PbO_2$  (120 mg) in benzene (2 mL) was stirred at r.t. for 2 h. The mixture was filtered with celite and the solvent was removed by evaporation. The residue was purified by HPLC (reverse phase, RP-18, eluent:  $CH_3CN/MeOH$  = 1/2) to give the desired product as a red solid (4 mg, 31%).  $^1H$  NMR (400 MHz,  $CDCl_3$ )  $\delta$ : 8.26 (d,  $J$  = 8.0 Hz, 1H), 8.00 (d,  $J$  = 9.6 Hz, 1H), 7.96 (d,  $J$  = 8.0 Hz, 1H), 7.82 (d,  $J$  = 8.0 Hz, 1H), 7.58–7.51 (m, 12H), 7.49–7.42 (m, 7H), 7.39–7.28 (m, 17H), 7.24–7.20 (m, 3H), 7.16 (t,  $J$  = 8.0 Hz, 1H), 7.08 (d,  $J$  = 9.6 Hz, 1H), 7.01 (d,  $J$  = 8.0 Hz, 1H), 6.54 (d,  $J$  = 8.0 Hz, 1H).  $^{13}C$  NMR (100 MHz,  $CDCl_3$ )  $\delta$ : 164.3, 164.0, 162.4, 154.3, 151.9, 141.9, 140.8, 137.1, 134.9, 134.7, 133.9, 132.9, 131.9, 131.8, 131.7, 131.6, 131.6, 131.5, 131.4, 130.3, 129.9, 129.7, 129.3, 129.1, 129.0, 128.6, 128.4, 128.3, 128.01, 127.98, 127.52, 127.47, 127.3, 127.0, 126.5, 126.2, 125.8, 125.5, 125.3, 123.5, 123.1, 123.03, 123.00, 122.9, 122.5, 120.9, 118.2, 130.3, 92.1, 91.7, 90.5, 89.9, 89.5, 89.3, 89.2, 89.0, 66.7. HRMS (ESI-TOF): calculated for  $C_{82}H_{48}N_4$   $[M+H]^+$ : 1089.3952, found: 1089.3960.

### Compound S4

A solution of 8,8'-Dimethyl-[1,1'-binaphthalene]-2,2'-dicarbaldehyde (6.5 mg, 0.019 mmol), 1,2-bis(4-(phenylethynyl)phenyl)ethane-1,2-dione (23 mg, 0.056 mmol), ammonium acetate (20 mg, 0.26 mmol) in AcOH (0.5 mL) and  $CHCl_3$  (0.2 mL) was sealed and stirred at 110 °C for 18 h. The mixture was neutralized with  $NH_3$  aq. at 0 °C, and extracted with  $CH_2Cl_2$ . The organic layer was washed with water and brine, and passed through a phase separator paper. The residue was separated by PTLC twice (hexane:AcOEt = 3:1, and then hexane: $CH_2Cl_2$ :AcOEt = 20:80:1) to give the desired product as a yellow solid (8 mg, 36%).  $^1H$  NMR (400 MHz,  $CDCl_3$ )  $\delta$ : 8.64 (d,  $J$  = 8.0 Hz, 2H), 8.17–8.14 (m, 4H), 7.95 (d,  $J$  = 8.0 Hz, 2H), 7.56–7.48 (m, 14H), 7.43–7.31 (m, 22H), 6.66 (d,  $J$  = 8.0 Hz, 4H), 2.00 (s, 6H).  $^{13}C$  NMR (100 MHz,  $CDCl_3$ )  $\delta$ : 145.3, 137.2, 136.3, 135.6, 134.7, 134.3, 132.7, 132.4, 131.8, 131.63, 131.57, 130.8, 129.7, 129.6, 128.4, 128.3, 128.2, 128.1, 127.7, 127.6, 127.4, 127.1, 126.6, 123.3, 123.1, 122.5, 121.8, 90.6, 89.8, 89.6, 89.0, 24.7. HRMS (ESI-TOF): calculated for  $C_{84}H_{54}N_4$   $[M+H]^+$ : 1119.4421, found: 1119.4434.

### Compound 4

A solution of **S4** (8 mg, 0.0071 mmol),  $PbO_2$  (100 mg) in benzene (2 mL) was stirred at r.t. for 2 h. The mixture was filtered with celite and the solvent was removed by evaporation. The residue was purified by HPLC (reverse phase, RP-18, eluent:

CH<sub>3</sub>CN/MeOH = 1/2) to give the desired product as a red solid (5 mg, 63%). <sup>1</sup>H NMR (400 MHz, CDCl<sub>3</sub>) δ: 8.28 (d, *J* = 8.4 Hz, 1H), 8.10 (d, *J* = 8.4 Hz, 1H), 8.08 (d, *J* = 10.0 Hz, 1H), 7.75 (d, *J* = 8.0 Hz, 1H), 7.60–7.51 (m, 10H), 7.47–7.44 (m, 6H), 7.43–7.34 (m, 9H), 7.32–7.27 (m, 9H), 7.23 (d, *J* = 7.6 Hz, 1H), 7.19 (d, *J* = 7.6 Hz, 1H), 7.07 (d, *J* = 6.8 Hz, 1H), 7.02 (d, *J* = 7.2 Hz, 1H), 6.98 (d, *J* = 7.6 Hz, 1H), 6.65–6.60 (m, 3H), 2.25 (s, 3H), 1.45 (s, 3H). <sup>13</sup>C NMR (100 MHz, CDCl<sub>3</sub>) δ: 164.0, 163.1, 161.9, 153.4, 147.6, 142.9, 141.9, 138.5, 136.2, 135.8, 135.3, 135.1, 134.8, 134.4, 133.9, 133.6, 133.0, 132.6, 132.1, 131.71, 131.69, 131.5, 131.4, 131.3, 131.18, 130.2, 130.15, 130.0, 129.8, 129.4, 129.05, 128.98, 128.64, 128.57, 128.56, 128.5, 128.4, 128.41, 128.40, 128.2, 128.0, 126.8, 126.3, 126.2, 125.2, 125.1, 125.0, 123.5, 123.3, 123.04, 123.01, 122.9, 120.7, 117.9, 91.9, 91.6, 90.4, 89.9, 89.4, 89.3, 89.2, 89.0, 69.8, 22.1, 21.4. HRMS (ESI-TOF): calculated for C<sub>84</sub>H<sub>52</sub>N<sub>4</sub> [M+H]<sup>+</sup>: 1117.4265, found: 1117.4265.

## 2. NMR Spectra

### <sup>1</sup>H NMR Spectra

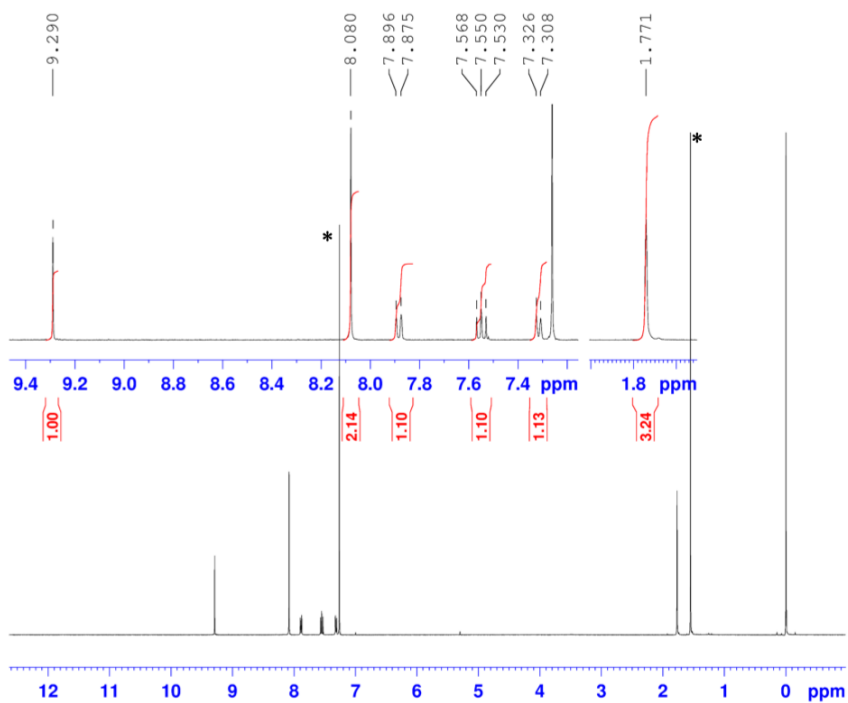

Fig. S1 <sup>1</sup>H NMR spectrum of 8,8'-Dimethyl-[1,1'-binaphthalene]-2,2'-dicarbaldehyde (S5) in CDCl<sub>3</sub> (\* solvent peaks).

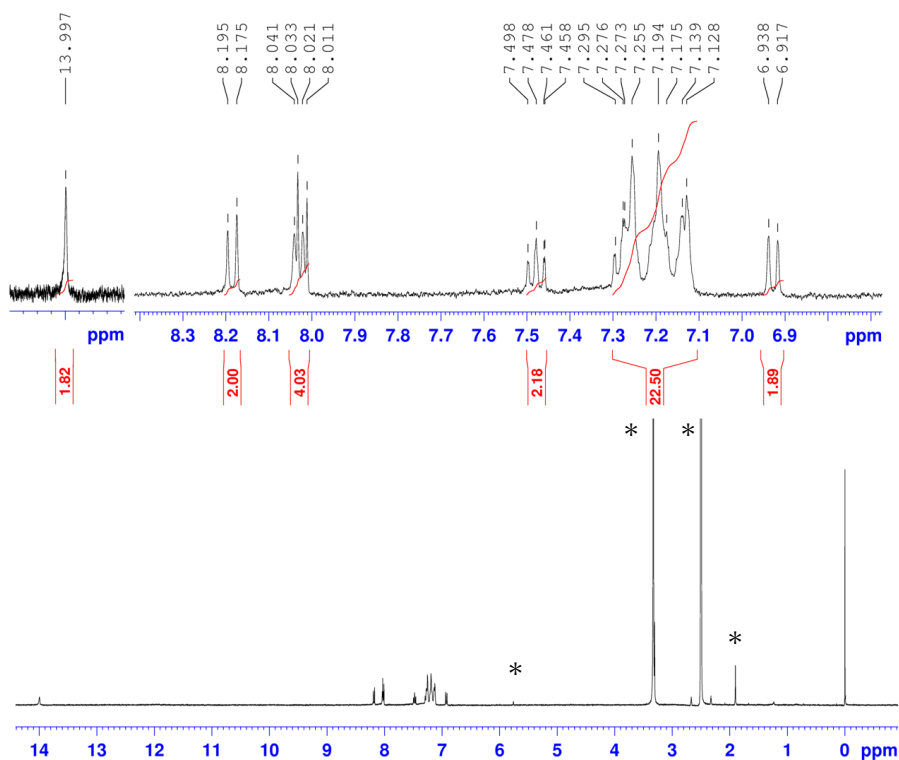

Fig. S2  $^1\text{H}$  NMR spectrum of **S1** in  $\text{DMSO-}d_6$  (\* solvent peaks).

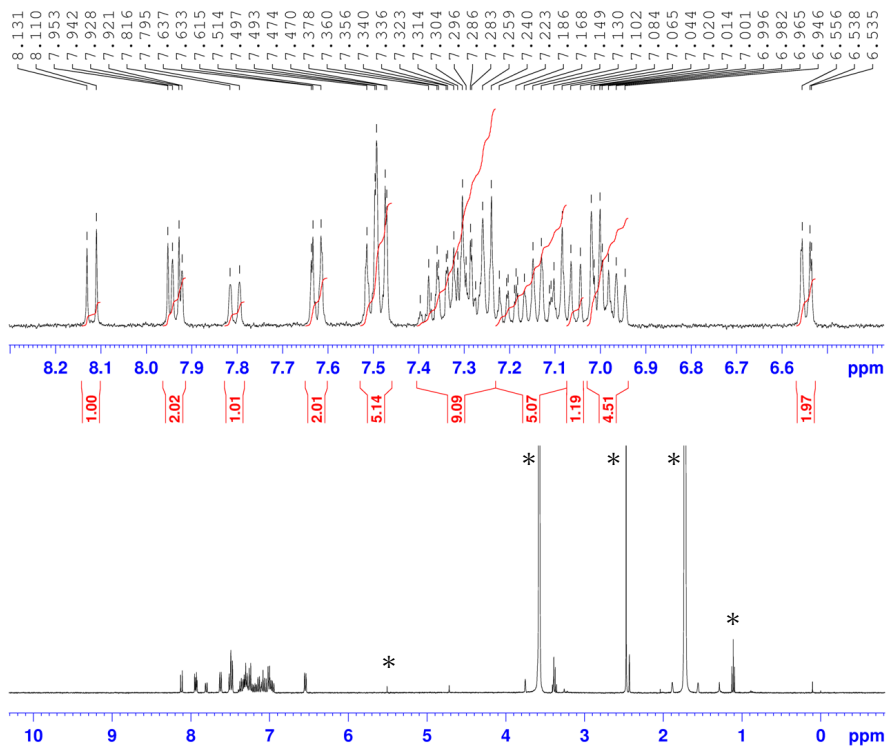

Fig. S3  $^1\text{H}$  NMR spectrum of **1** in  $\text{THF-}d_8$  (\* solvent peaks).

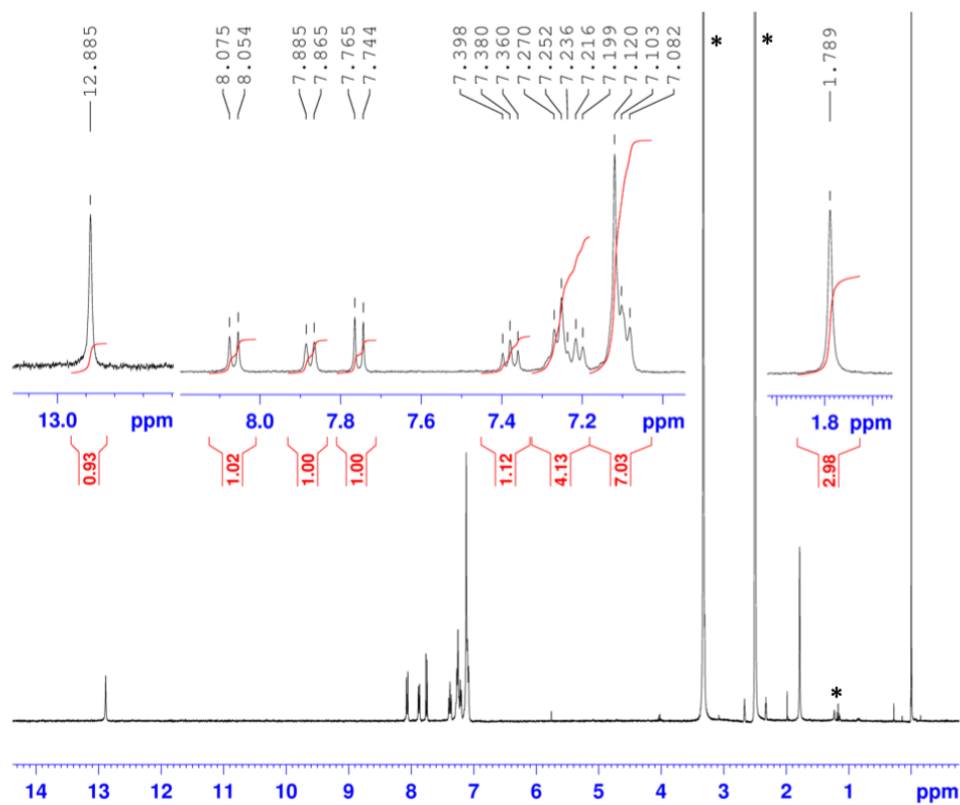

Fig. S4  $^1\text{H}$  NMR spectrum of S2 in  $\text{CDCl}_3$  (\* solvent peaks).

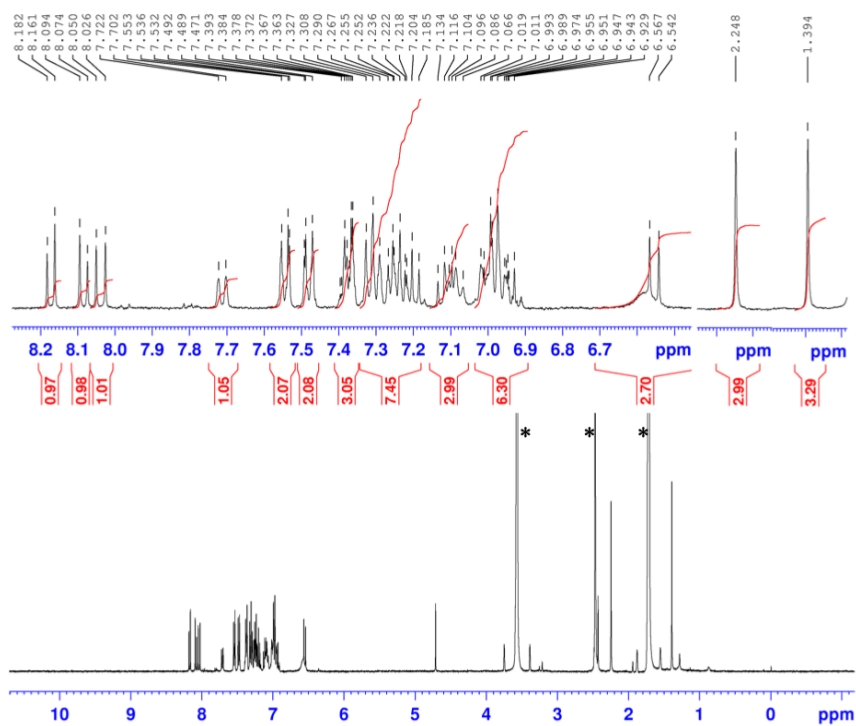

Fig. S5  $^1\text{H}$  NMR spectrum of 2 in  $\text{THF-}d_8$  (\* solvent peaks).



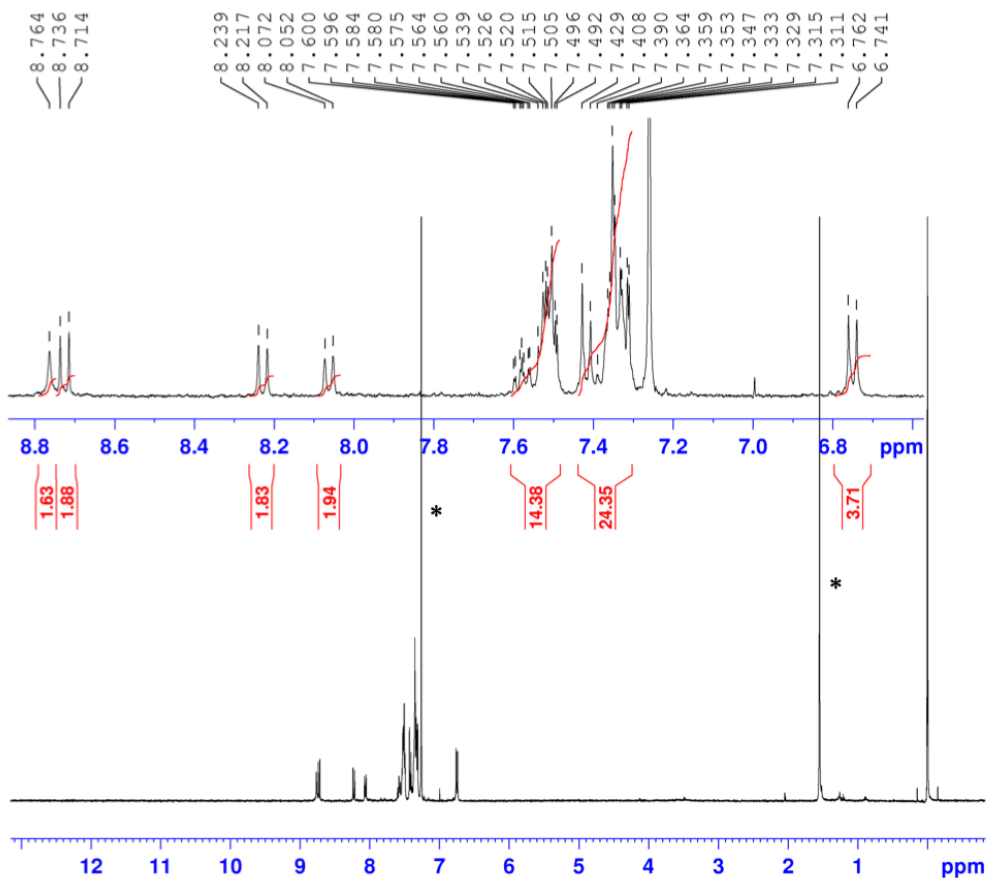

Fig. S6  $^1\text{H}$  NMR spectrum of S3 in  $\text{CDCl}_3$  (\* solvent peaks).

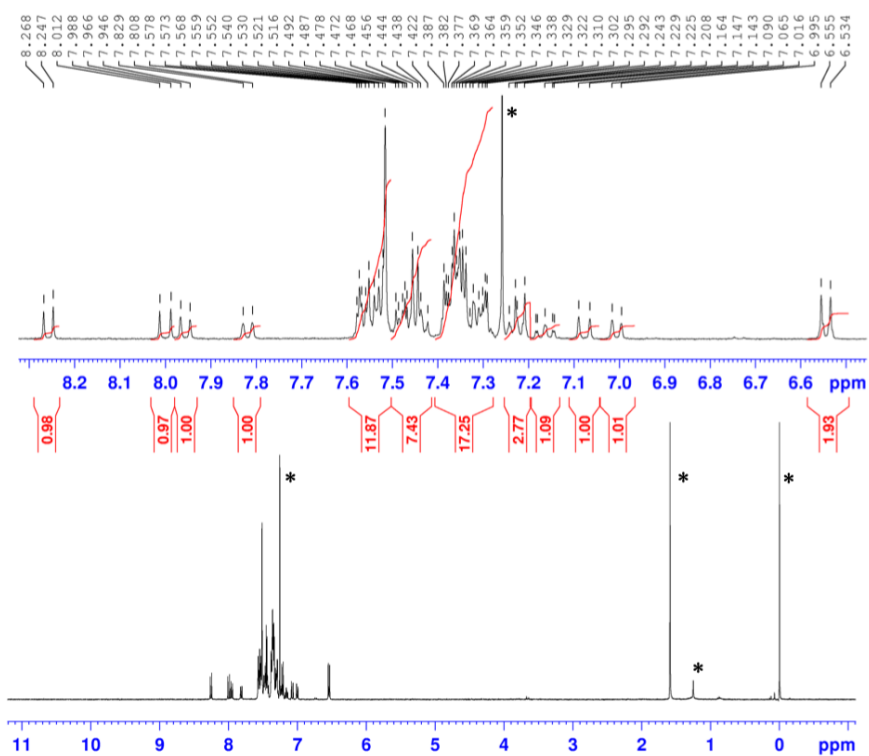

Fig. S7  $^1\text{H}$  NMR spectrum of **3** in  $\text{CDCl}_3$  (\* solvent peaks).

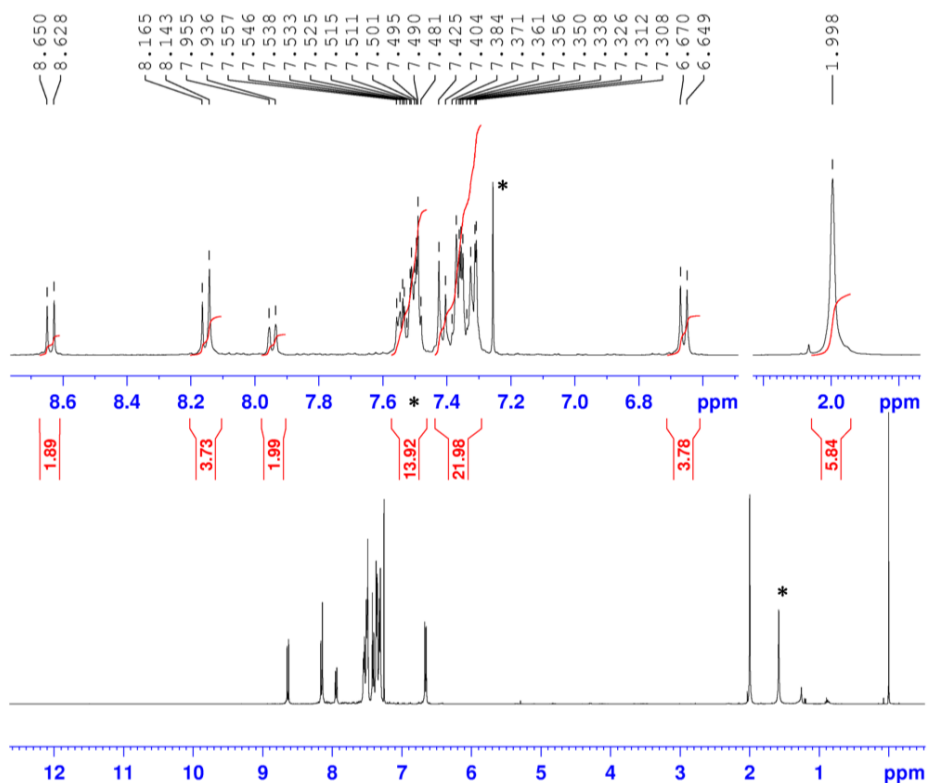

Fig. S8  $^1\text{H}$  NMR spectrum of S4 in  $\text{CDCl}_3$  (\* solvent peaks).

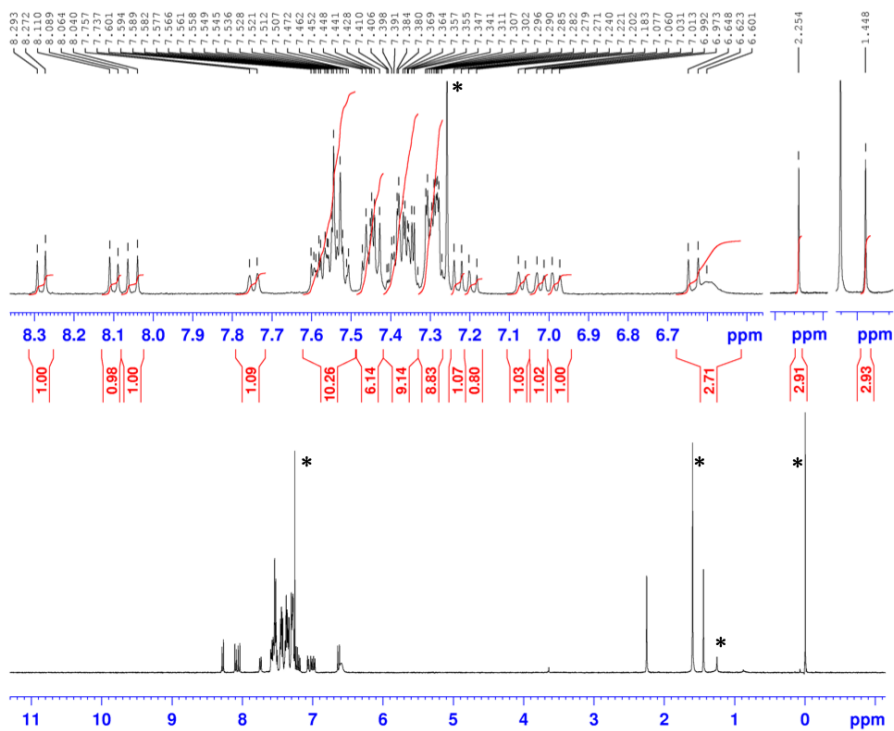

Fig. S9  $^1\text{H}$  NMR spectrum of 4 in  $\text{CDCl}_3$  (\* solvent peaks).

# <sup>13</sup>C NMR Spectra

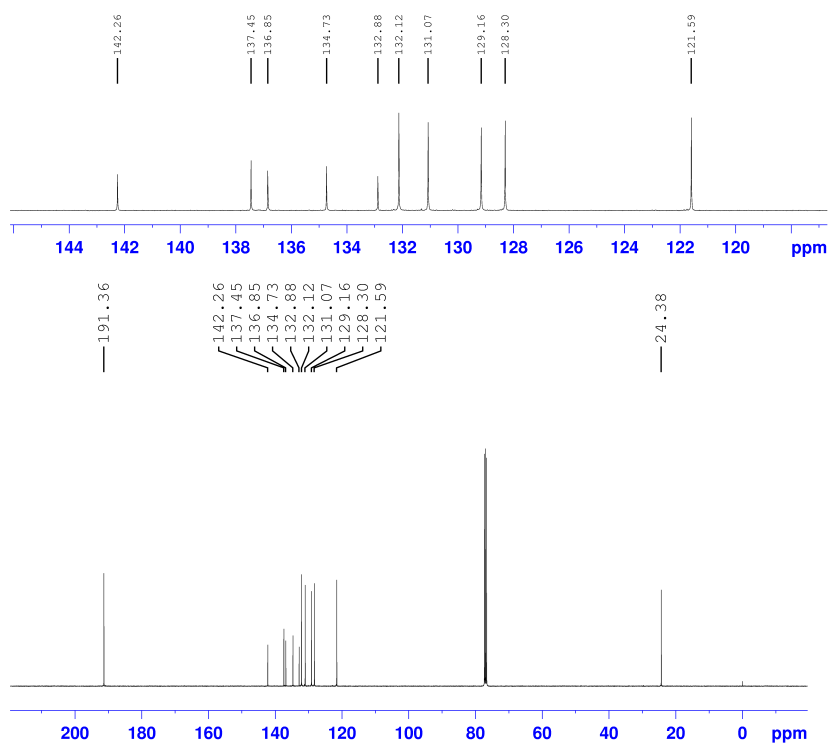

**Fig. S10** <sup>13</sup>C NMR spectrum of 8,8'-Dimethyl-[1,1'-binaphthalene]-2,2'-dicarbaldehyde (S5) in CDCl<sub>3</sub>.

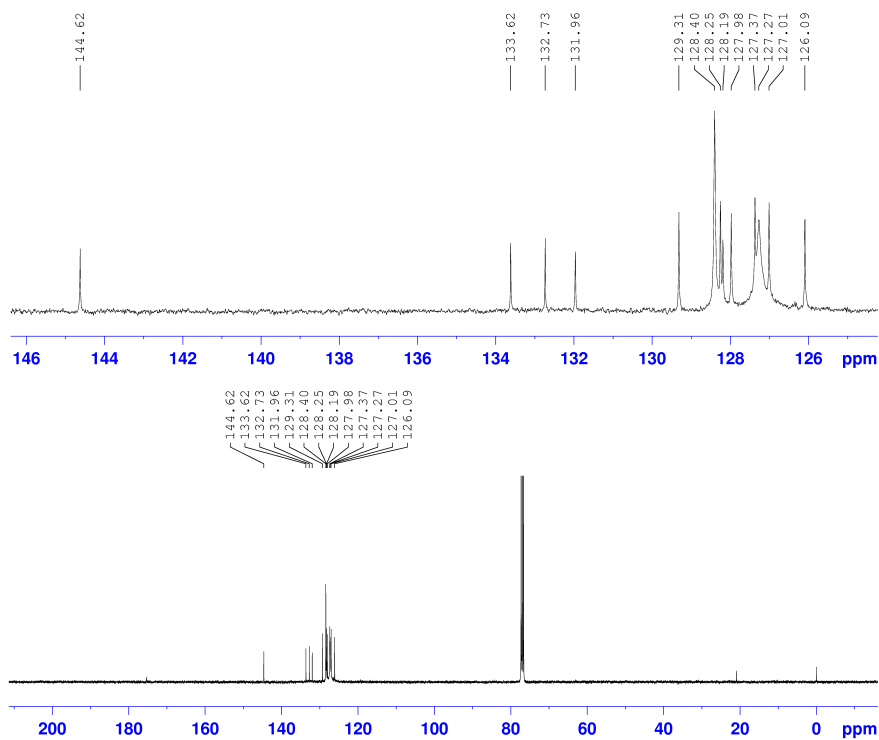

Fig. S11  $^{13}\text{C}$  NMR spectrum of S1 in  $\text{CDCl}_3$ .

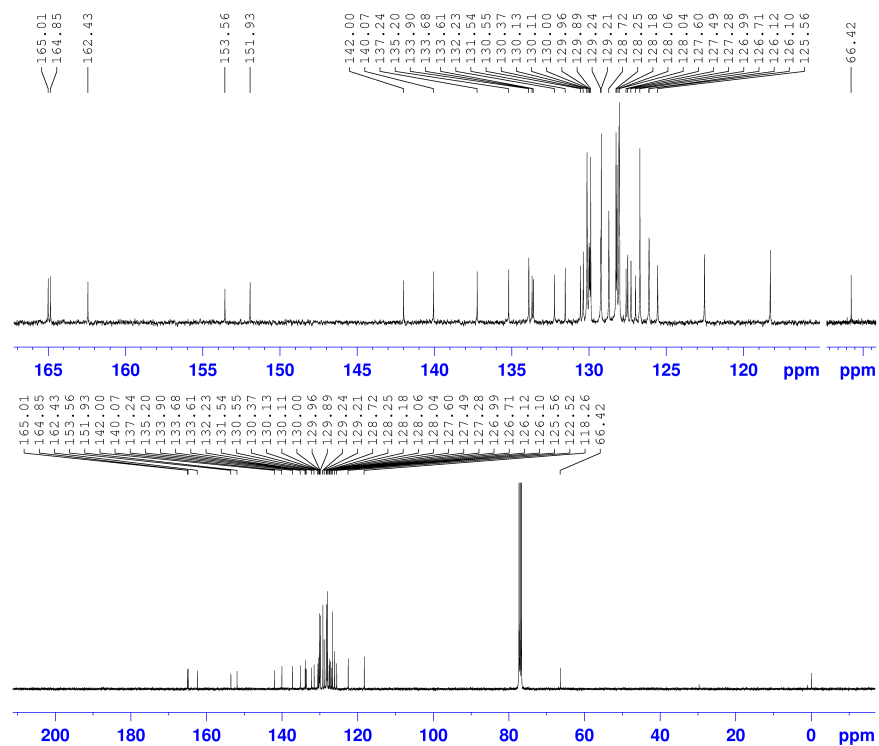

Fig. S12  $^{13}\text{C}$  NMR spectrum of 1 in  $\text{CDCl}_3$ .

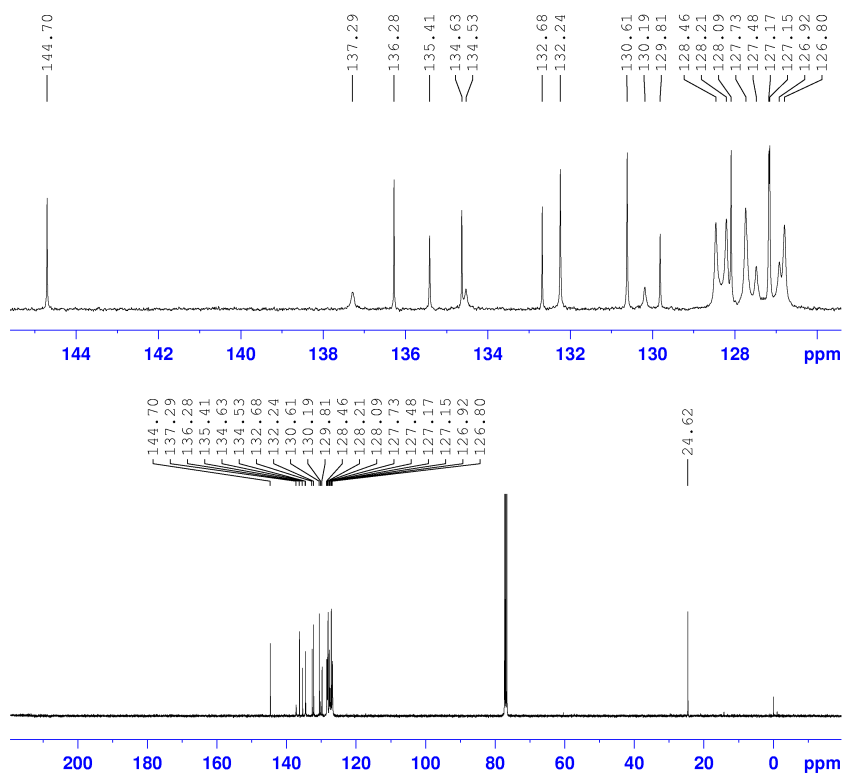

Fig. S13 <sup>13</sup>C NMR spectrum of S2 in CDCl<sub>3</sub>.

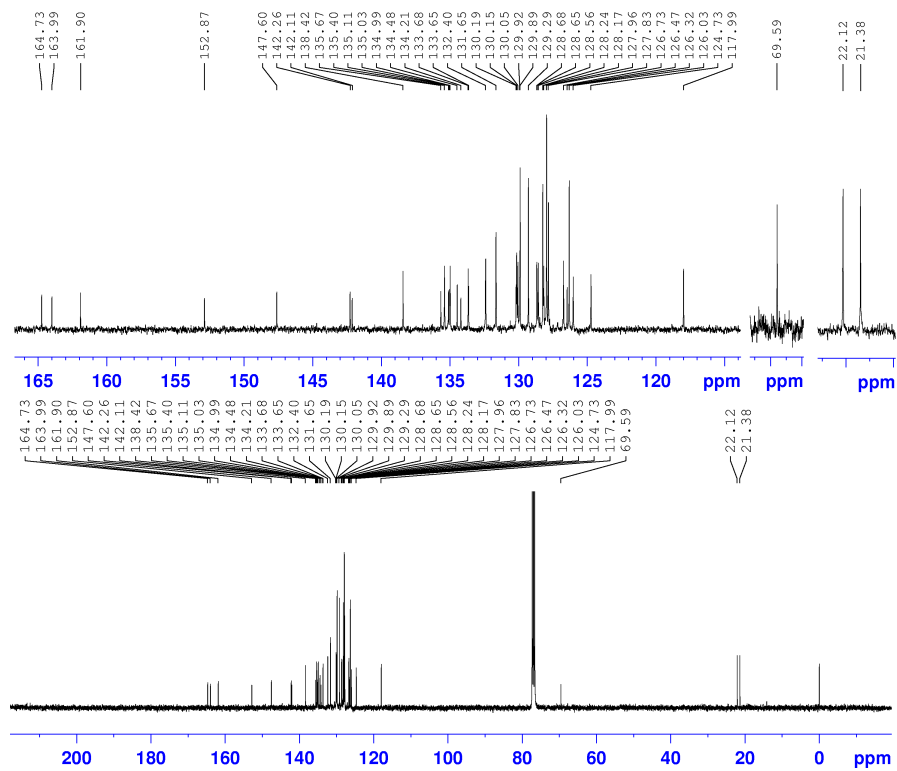

Fig. S14 <sup>13</sup>C NMR spectrum of 2 in CDCl<sub>3</sub>.



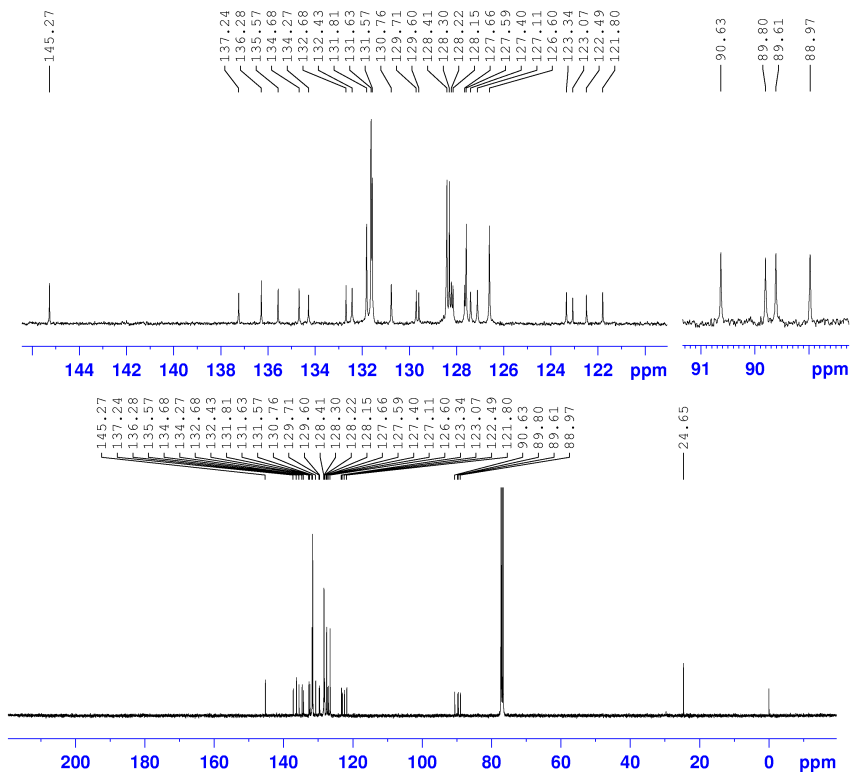

Fig. S17  $^{13}\text{C}$  NMR spectrum of S4 in  $\text{CDCl}_3$ .

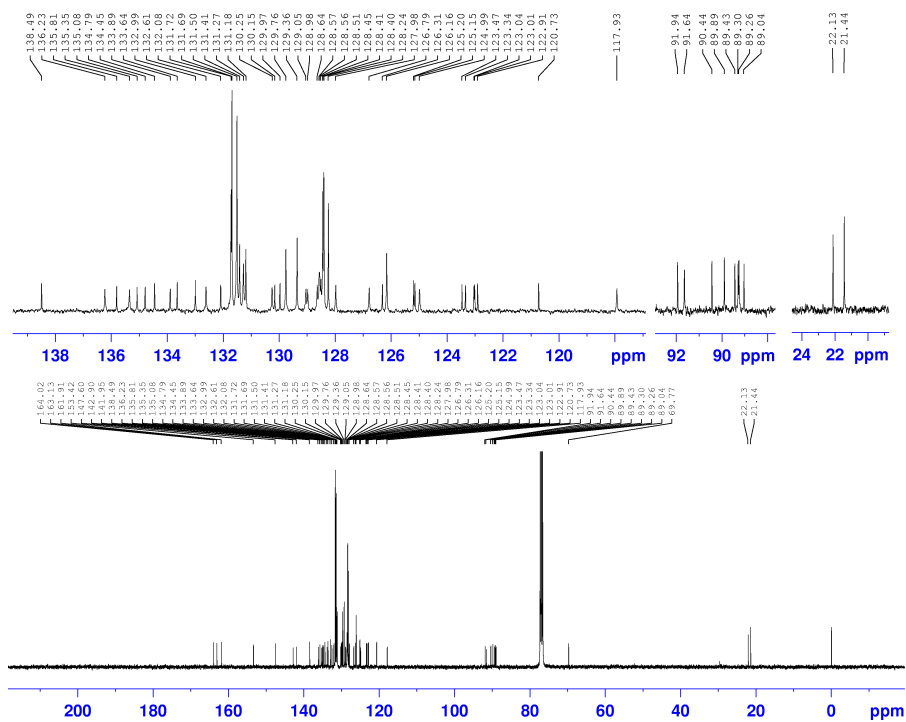

Fig. S18  $^{13}\text{C}$  NMR spectrum of 4 in  $\text{CDCl}_3$ .

### 3. HR-ESI-TOF MS Spectra

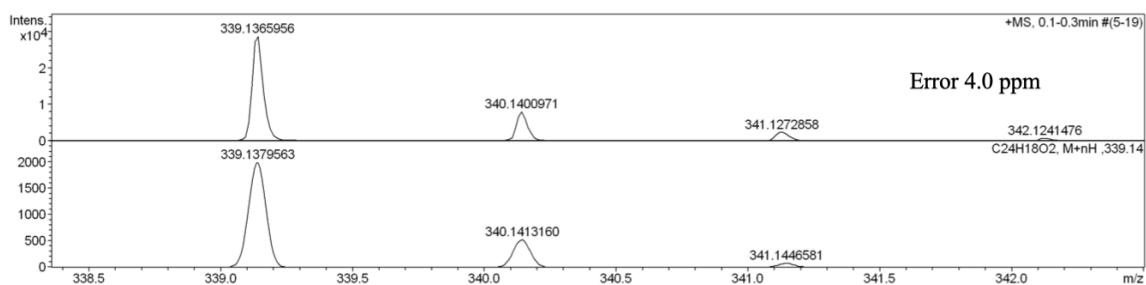

**Fig. S19** HR-APCI-TOF MS spectra of 8,8'-dimethyl-[1,1'-binaphthalene]-2,2'-dicarbaldehyde (S5).

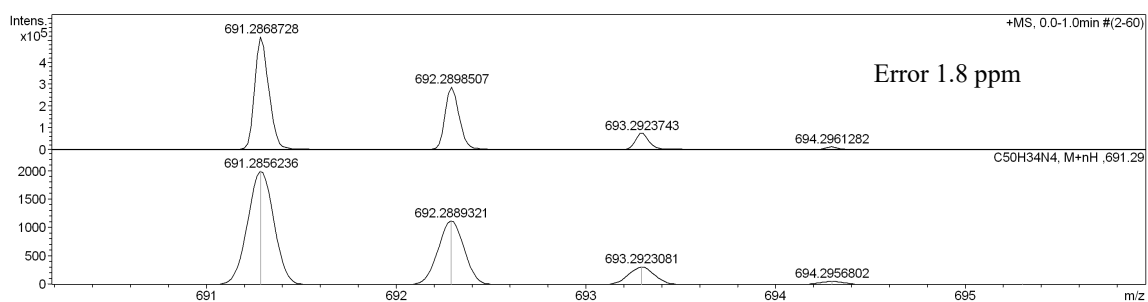

**Fig. S20** HR-ESI-TOF MS spectra of S1.

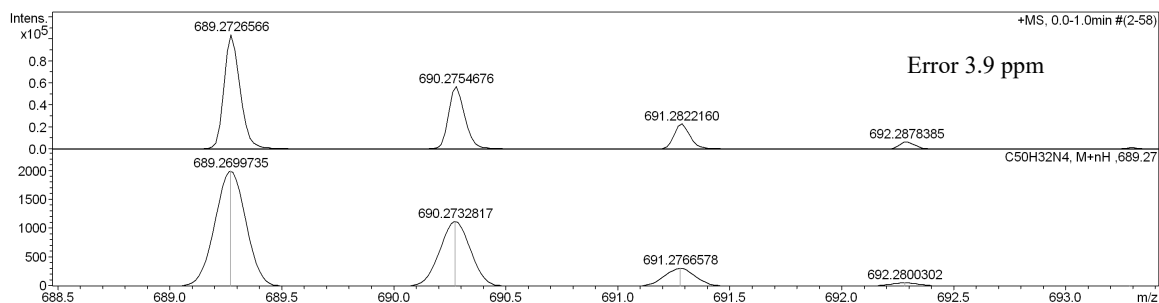

**Fig. S21** HR-ESI-TOF MS spectra of 1.



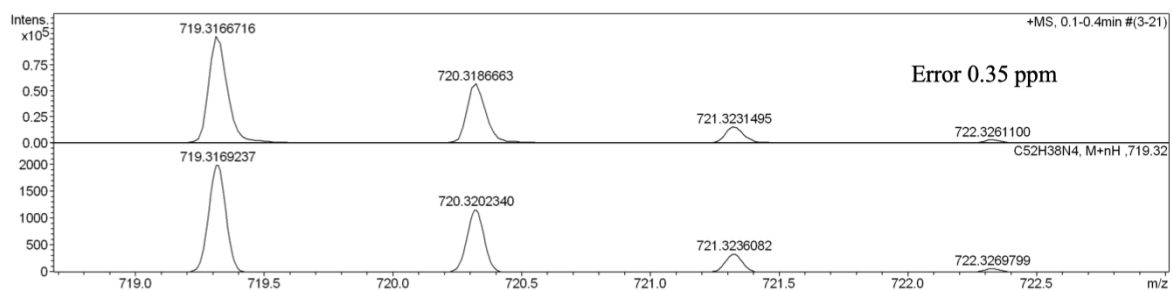

Fig. S22 HR-APCI-TOF MS spectra of S2.

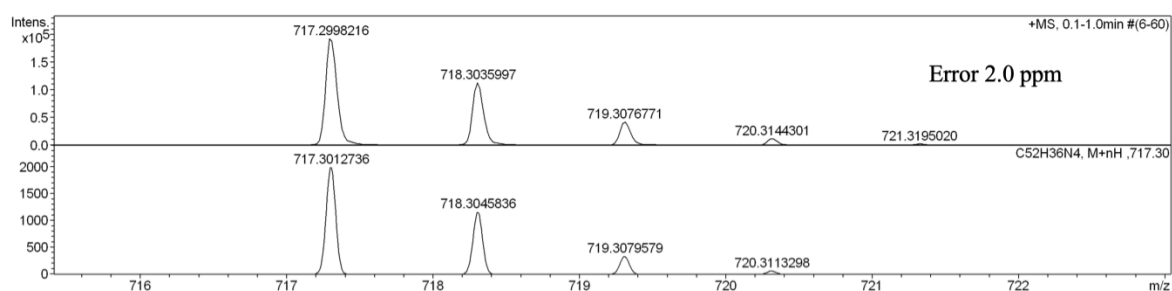

Fig. S23 HR-ESI-TOF MS spectra of 2.

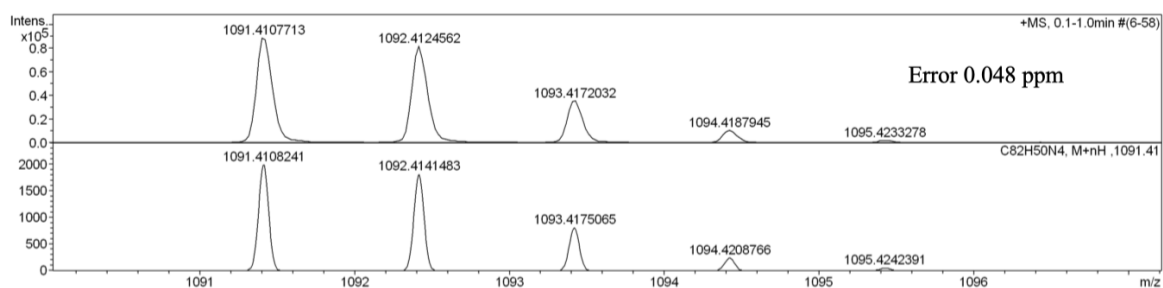

Fig. S24 HR-ESI-TOF MS spectra of S3.

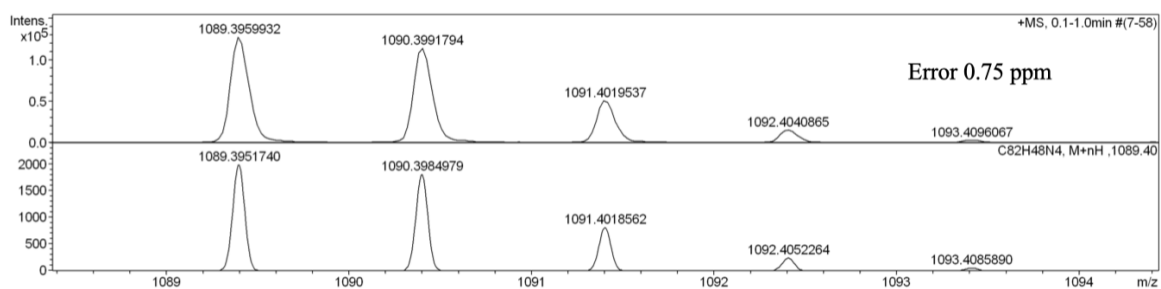

Fig. S25 HR-ESI-TOF MS spectra of 3.

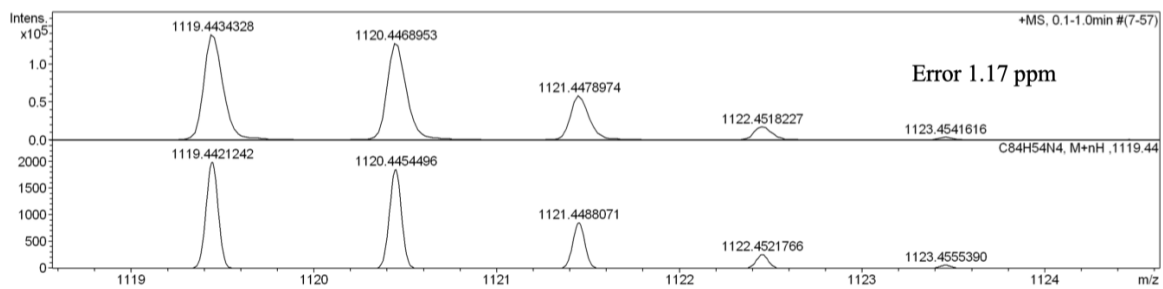

Fig. S26 HR-ESI-TOF MS spectra of S4.

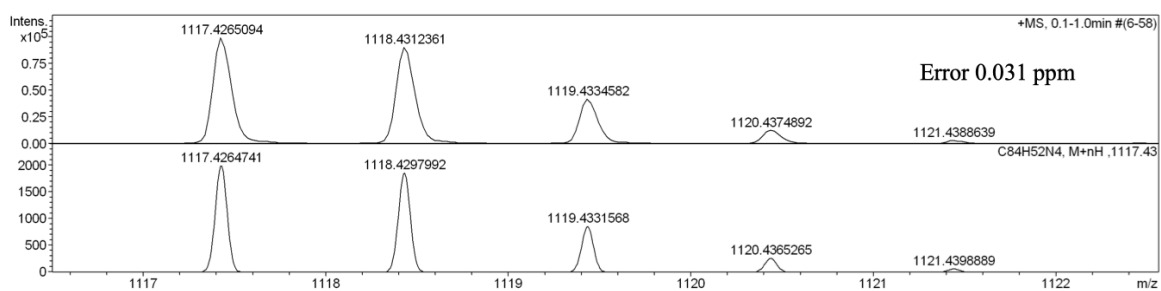

Fig. S27 HR-ESI-TOF MS spectra of 4.

## 4. HPLC Chromatograms

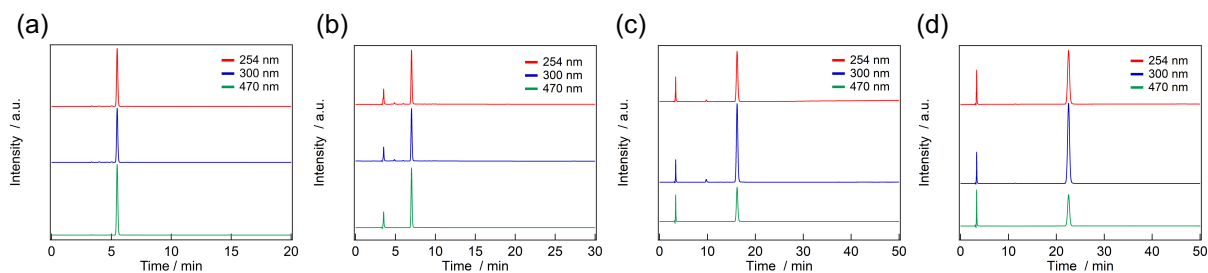

**Fig. S28** HPLC chromatograms of (a) **1** (96% purity), (b) **2** (95% purity), (c) **3** (97% purity), and (d) **4** (98% purity). HPLC analysis was performed using a reverse phase analytical column (Mightysil RP18, 25 cm×4.6 mm, 5  $\mu$ m particle) from Kanto Chemical Industries, equipped with a PDA detector; the mobile phase was  $\text{CH}_3\text{CN}:\text{MeOH} = 1:1$  with a flow rate of 1.0 mL/min (detection wavelength; 254, 300, and 470 nm).

## 5. X-ray Crystallographic Analyses

The diffraction data of the single crystal were collected on Rigaku XtaLAB mini II with Mo K $\alpha$  radiation ( $\lambda = 0.71073 \text{ \AA}$ ) at 100 K. The data integration and reduction were undertaken with Rigaku CrysAlis<sup>Pro</sup>. The data refinement was carried out by Olex<sup>2</sup> software package with SHELXL program.<sup>S4</sup> All non-hydrogen atoms were anisotropically refined.

**Table S1** Crystallographic Parameters of 5MR of **1**

|                                      |                                                                                                                                                      |
|--------------------------------------|------------------------------------------------------------------------------------------------------------------------------------------------------|
| Empirical formula                    | C <sub>50</sub> H <sub>32</sub> N <sub>4</sub>                                                                                                       |
| Formula weight                       | 688.79                                                                                                                                               |
| Temperature                          | 106(8) K                                                                                                                                             |
| Wavelength                           | 0.71073 $\text{\AA}$                                                                                                                                 |
| Crystal system                       | orthorhombic                                                                                                                                         |
| Space group                          | P2 <sub>1</sub> 2 <sub>1</sub> 2 <sub>1</sub>                                                                                                        |
| Unit cell dimensions                 | a = 9.5250(5) $\text{\AA}$ $\alpha = 90^\circ$<br>b = 14.4544(9) $\text{\AA}$ $\beta = 90^\circ$<br>c = 26.1380(12) $\text{\AA}$ $\gamma = 90^\circ$ |
| Volume                               | 3598.6(3) $\text{\AA}^3$                                                                                                                             |
| Z                                    | 4                                                                                                                                                    |
| Density (calculated)                 | 1.271 g/cm <sup>3</sup>                                                                                                                              |
| Absorption coefficient               | 0.075 mm <sup>-1</sup>                                                                                                                               |
| F(000)                               | 1440.0                                                                                                                                               |
| Theta range for data collection      | 4.202 to 61.118 $^\circ$                                                                                                                             |
| Index ranges                         | -13 $\leq h \leq 13$ , -17 $\leq k \leq 20$ , -37 $\leq l \leq 37$                                                                                   |
| Reflections collected                | 19914                                                                                                                                                |
| Independent reflections              | 8837 [R(int) = 0.0434]                                                                                                                               |
| Absorption correction                | multi-scan                                                                                                                                           |
| Refinement method                    | Full-matrix least-squares on F <sup>2</sup>                                                                                                          |
| Data / restraints / parameters       | 8837 / 0 / 487                                                                                                                                       |
| Goodness-of-fit on F <sup>2</sup>    | 1.021                                                                                                                                                |
| Final R indices [I > 2 $\sigma$ (I)] | R1 = 0.0500, wR2 = 0.1102                                                                                                                            |
| R indices (all data)                 | R1 = 0.0675, wR2 = 0.1176                                                                                                                            |
| Largest diff. peak and hole          | 0.32 and -0.30 e $\text{\AA}^{-3}$                                                                                                                   |

**Table S2** Crystallographic Parameters of 5MR of 2

---

|                                   |                                                                                                        |
|-----------------------------------|--------------------------------------------------------------------------------------------------------|
| Empirical formula                 | C <sub>52</sub> H <sub>36</sub> N <sub>4</sub>                                                         |
| Formula weight                    | 716.892                                                                                                |
| Temperature                       | 104(7) K                                                                                               |
| Wavelength                        | 0.71073 Å                                                                                              |
| Crystal system                    | monoclinic                                                                                             |
| Space group                       | P21/n                                                                                                  |
| Unit cell dimensions              | a = 11.6158(3) Å      α = 90°<br>b = 25.7155(8) Å      β = 94.105(3)°<br>c = 12.4043(4) Å      γ = 90° |
| Volume                            | 3695.73(19) Å <sup>3</sup>                                                                             |
| Z                                 | 4                                                                                                      |
| Density (calculated)              | 1.288 g/cm <sup>3</sup>                                                                                |
| Absorption coefficient            | 0.076 mm <sup>-1</sup>                                                                                 |
| F(000)                            | 1504.8                                                                                                 |
| Theta range for data collection   | 4.56 to 52°                                                                                            |
| Index ranges                      | -16 ≤ h ≤ 10, -35 ≤ k ≤ 36, -17 ≤ l ≤ 17                                                               |
| Reflections collected             | 39620                                                                                                  |
| Independent reflections           | 7227 [R(int) = 0.0613]                                                                                 |
| Absorption correction             | multi-scan                                                                                             |
| Refinement method                 | Full-matrix least-squares on F <sup>2</sup>                                                            |
| Data / restraints / parameters    | 7227 / 189 / 523                                                                                       |
| Goodness-of-fit on F <sup>2</sup> | 1.033                                                                                                  |
| Final R indices [I > 2σ(I)]       | R1 = 0.0476, wR2 = 0.0944                                                                              |
| R indices (all data)              | R1 = 0.0960, wR2 = 0.1114                                                                              |
| Largest diff. peak and hole       | 0.48 and -0.43 eÅ <sup>-3</sup>                                                                        |

---

**Table S3** Crystallographic Parameters of 8MR of 2

---

|                                   |                                                                                                 |
|-----------------------------------|-------------------------------------------------------------------------------------------------|
| Empirical formula                 | C <sub>64</sub> H <sub>48</sub> N <sub>4</sub>                                                  |
| Formula weight                    | 873.06                                                                                          |
| Temperature                       | 105(8) K                                                                                        |
| Wavelength                        | 0.71073 Å                                                                                       |
| Crystal system                    | orthorhombic                                                                                    |
| Space group                       | P2 <sub>1</sub> 2 <sub>1</sub> 2 <sub>1</sub>                                                   |
| Unit cell dimensions              | a = 13.5892(3) Å      α = 90°<br>b = 17.5461(4) Å      β = 90°<br>c = 19.4886(4) Å      γ = 90° |
| Volume                            | 4646.81(18) Å <sup>3</sup>                                                                      |
| Z                                 | 4                                                                                               |
| Density (calculated)              | 1.248 g/cm <sup>3</sup>                                                                         |
| Absorption coefficient            | 0.073 mm <sup>-1</sup>                                                                          |
| F(000)                            | 1840.0                                                                                          |
| Theta range for data collection   | 4.33 to 61.336°                                                                                 |
| Index ranges                      | -19<=h<=17, -24<=k<=23, -26<=l<=27                                                              |
| Reflections collected             | 35777                                                                                           |
| Independent reflections           | 13363 [R(int) = 0.0391]                                                                         |
| Absorption correction             | multi-scan                                                                                      |
| Refinement method                 | Full-matrix least-squares on F <sup>2</sup>                                                     |
| Data / restraints / parameters    | 10823 / 165 / 522                                                                               |
| Goodness-of-fit on F <sup>2</sup> | 1.012                                                                                           |
| Final R indices [I>2sigma(I)]     | R1 = 0.0552, wR2 = 0.1024                                                                       |
| R indices (all data)              | R1 = 0.0931, wR2 = 0.1144                                                                       |
| Largest diff. peak and hole       | 0.24 and -0.21 eÅ <sup>-3</sup>                                                                 |

---

## 6. Transient Absorption Spectroscopy

The visible light (470 nm) was irradiated to the benzene solution of **1**, **2**, **3**, and **4** in a quartz optical cuvette (optical length = 1 cm) using a LED light source (CL-H1-470-9-1, Asahi Spectra Co., Ltd.). The transient absorption spectra and the time variation of the transient absorbance were recorded on an Ocean FX multichannel detector (Ocean Optics, Inc). The power of the excitation light was measured using NOVA (OPHIR Optronics Solutions Ltd.) equipped with a power thermal sensor 30A-P17 (OPHIR Optronics Solutions Ltd.). CUV-QPOD (Ocean Optics, Inc) equipped with a TC 125 temperature controller (QUANTUM) was used as a cuvette holder. A deuterium and a halogen lamps DH-2000-BAL (Ocean Optics, Inc) were used as the probe beam, which were guided with a QP-600-1-SR optical fiber (Ocean Optics, Inc). Optical grade solvents were used for all measurements.

## 7. Laser Flash Photolysis Measurement

The laser flash photolysis experiments were performed by a TSP-2000 time-resolved spectrophotometer (Unisoku). A 10 Hz Qswitched Nd:YAG laser (Continuum Minilite II) with the third harmonic at 355 nm (pulse width = 5 ns) was employed as the excitation light source. The excitation pulse at 517 nm (pulse width, 5 ns) was provided by a Continuum Surelite II Q-Switched Nd:YAG coupled to a Continuum Panther EX OPO. A halogen lamp (OSRAM HLX 64623) was used as the probe beam arranged in an orientation perpendicular to the exciting laser beam. The probe beam was monitored with a photomultiplier tube (Hamamatsu R2949) through a spectrometer (Unisoku MD200) for the time profile for the thermal isomerization. The excitation intensity was estimated by an energy detector (Gentec Electro-Optics QE12LP-S-MB) with an energy monitor (Genetic Electro-Optics MAESTRO). Optical grade solvents were used for all measurements.

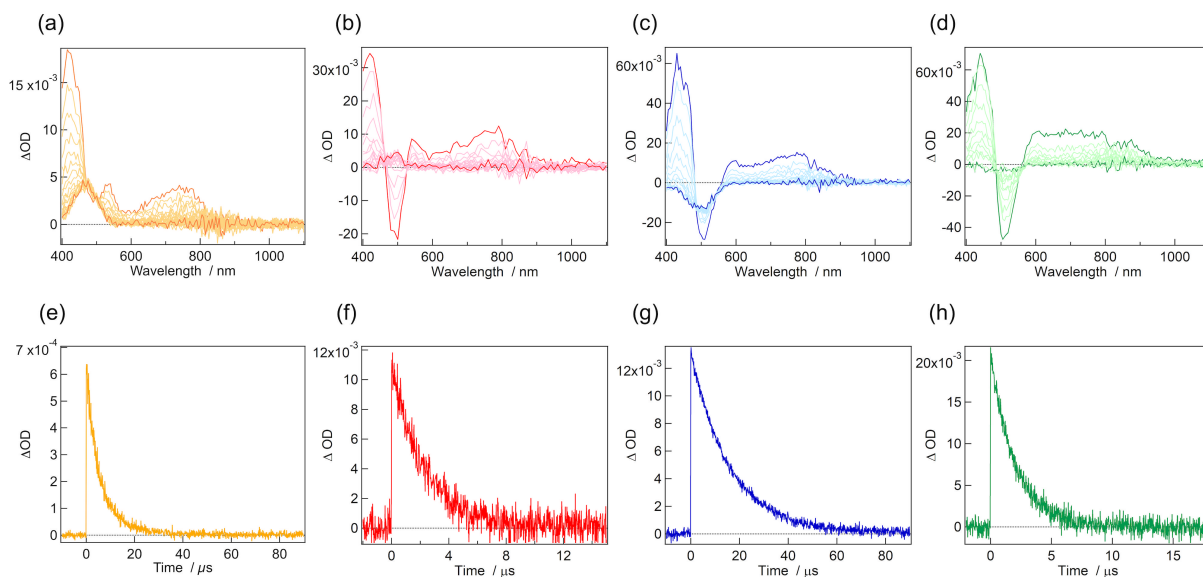

**Fig. S29** Microsecond time-resolved absorption spectra of (a) **1**, (b) **2**, (c) **3**, and (d) **4** in benzene at 298 K upon 355-nm laser irradiation (4 mJ/pulse). (e-h) The time profiles of the transient absorbance at 750 nm.

## 8. Determination of Conversion Efficiency of 5MR

Using 1,2-bis(2-methylbenzo[*b*]thiophene-3-yl)-perfluorocyclopentene (DAE) as a standard, the photochemical reaction efficiencies of **1–4** from 5MR to the colorless isomers in response to visible light irradiation were estimated by nanosecond laser flash photolysis.<sup>S2</sup> The quantum yield of the photochemical ring-opening reaction of the closed-ring isomer of DAE has been previously reported.<sup>S5</sup> Because the open-ring isomer of DAE and the colorless isomers (6MR and 8MR) of **1–4** do not have any absorption bands in the visible light region, the ratio of the number of reacting molecules of DAE and 5MR can be calculated from the change in the absorbance ( $\Delta OD$ ) in the visible light region upon laser irradiation. The benzene solutions of the imidazole dimers and DAE were prepared and the absorbance at 517 nm, the excitation wavelength, was matched. The absorbance changes in the absorbance at 517 nm ( $\Delta OD_{5MR}$  and  $\Delta OD_{DAE}$ ) associated with the photochromic reaction were plotted against the excitation laser energy (Fig. S30).  $\Delta OD_{5MR}$  values were calculated as the average of the values in the time region where the thermal back reaction can be negligible. The reaction efficiencies of 5MR for **1**, **2**, **3**, and **4** were estimated to be  $6.9 \times 10^{-2}$ ,  $4.5 \times 10^{-2}$ ,  $3.9 \times 10^{-2}$ , and  $1.7 \times 10^{-2}$ , respectively, by the following equation,

$$\frac{\varphi_{5MR}}{\varphi_{DAE}} = \frac{\Delta OD_{5MR}}{\varepsilon_{5MR}} \times \frac{\varepsilon_{DAE}}{\Delta OD_{DAE}}$$

where  $\varphi_{DAE}$  is the quantum yield (0.35) of the ring-opening reaction of DAE,  $\varepsilon_{DAE}$  ( $0.91 \times 10^4 \text{ M}^{-1} \text{ cm}^{-1}$ ) is an absorption coefficient of the closed-ring isomer of DAE, and  $\varepsilon_{5MR}$  for **1**, **2**, **3**, and **4** ( $9.92 \times 10^3$ ,  $1.62 \times 10^4$ ,  $3.68 \times 10^4$ , and  $4.41 \times 10^4 \text{ M}^{-1} \text{ cm}^{-1}$ , respectively) are absorption coefficients of 5MR.

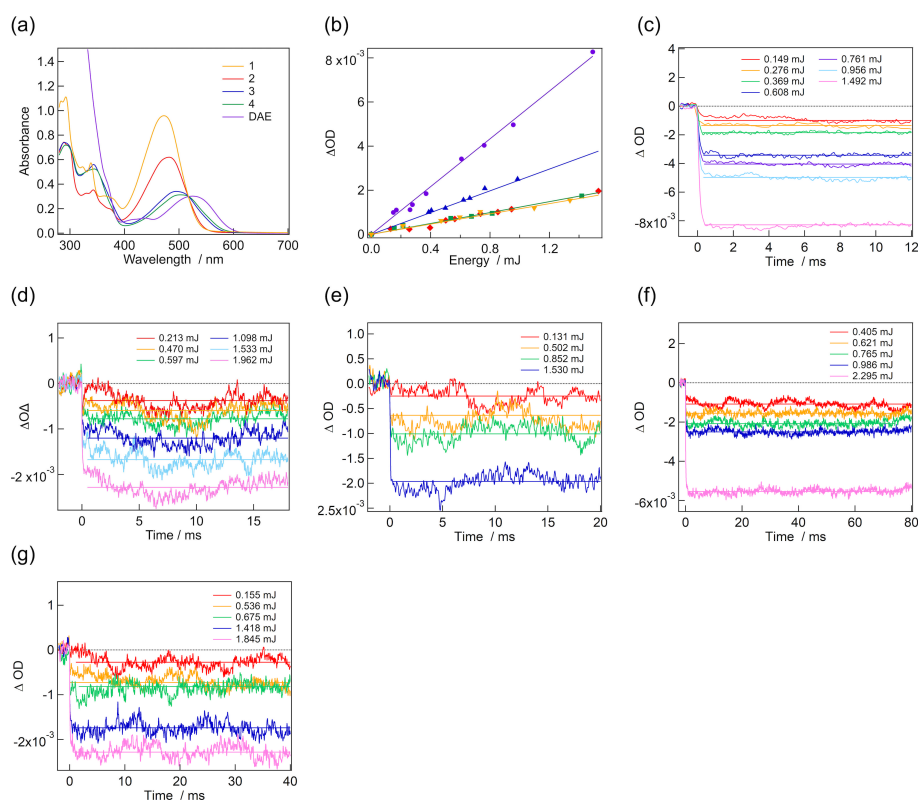

**Fig. S30** (a) Absorption spectra of **1–4**, and DAE in benzene. (b) Laser power dependence of the absorbance changes. (c-g) Laser intensity dependence of the time profiles of transient absorbance at 517 nm of (c) DAE, (d) **1**, (e) **2**, (f) **3**, (g) **4**.



## 9. Measurement for Conversion Efficiency to 8MR of 2 and 4

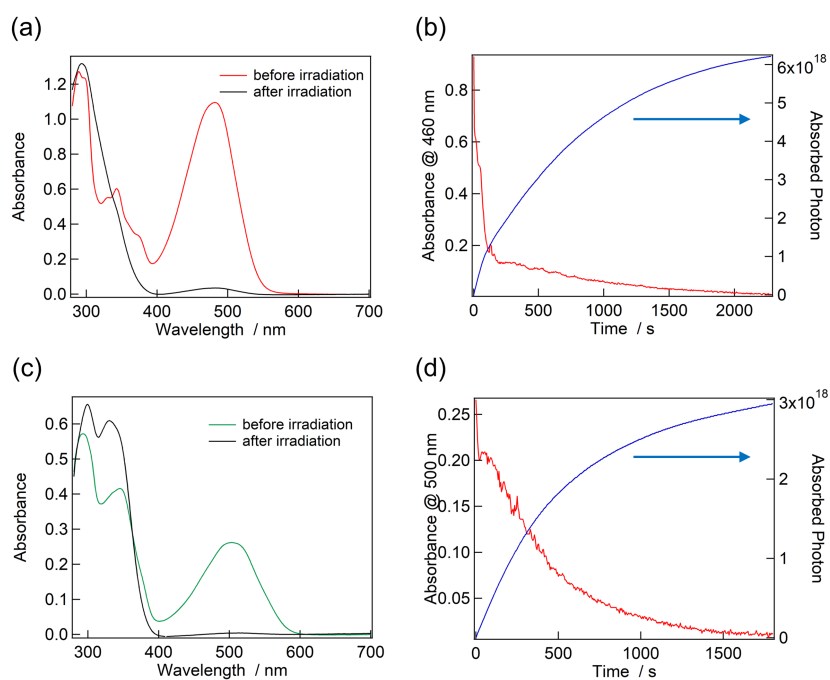

**Fig. S31** Absorption spectra of (a) **2** and (c) **4** in benzene before 460 nm LED light irradiation ( $40.8 \text{ mW cm}^{-2}$ ) and after the light irradiation was stopped and the photogenerated 6MR completely returned to 5MR. Simultaneous measurements of the time profiles of the absorbance of (b) **2** and (d) **4** in benzene under the 460 nm LED light irradiation and the number of photons absorbed by the benzene solution. All measurements were performed using a photoreaction evaluation system Lightway PQY-01 (Shimadzu Co.).

## 10. Fatigue Resistance of **3**

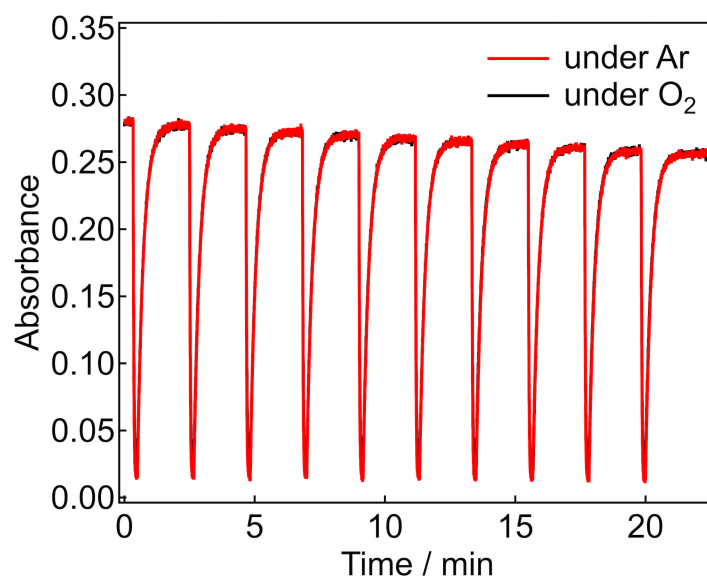

**Fig. S32** Cycles of decoloration by light irradiation and the subsequent thermal coloration when the irradiation was ceased in the benzene solution of **3** ( $6.13 \times 10^{-6}$  M) at 298 K. Absorbance was monitored at 500 nm. A 470 nm LED light source (Asahi Spectra Co., Ltd. CL-H1-470-9-1) was employed for the light irradiation.

## 11. DFT Calculations

All calculations were carried out using the Gaussian 16 program (Revision B.01).<sup>S6</sup> The molecular structures were fully optimized at the DFT CAM-B3LYP level of theory using the 6-31G(d) basis set. All optimized structures were confirmed to be stationary points by frequency analysis. No imaginary modes were found for the minima structures and only one imaginary mode was present for the transition states, proving the latter to be first order saddle points on the hyper-potential energy surface. Absorption spectra of biradicals were calculated at the TDDFT UMPW1PW91 level of theory using 6-31+G(d) basis set.

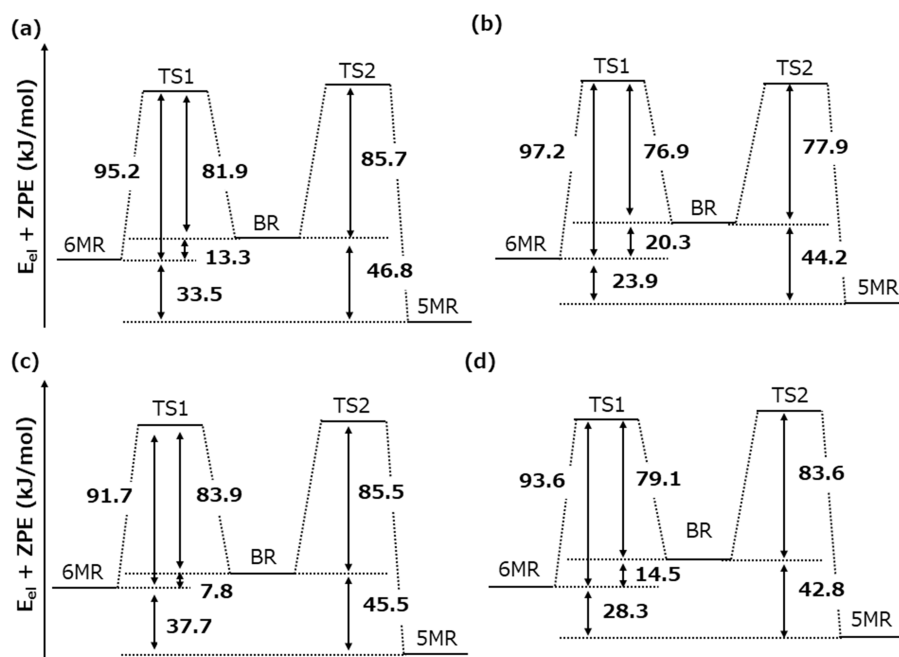

**Fig. S33** Energy level diagrams of (a) **1**, (b) **2**, (c) **3**, and (d) **4**. Relative electronic energies in kJ/mol with unscaled zero-point correction.

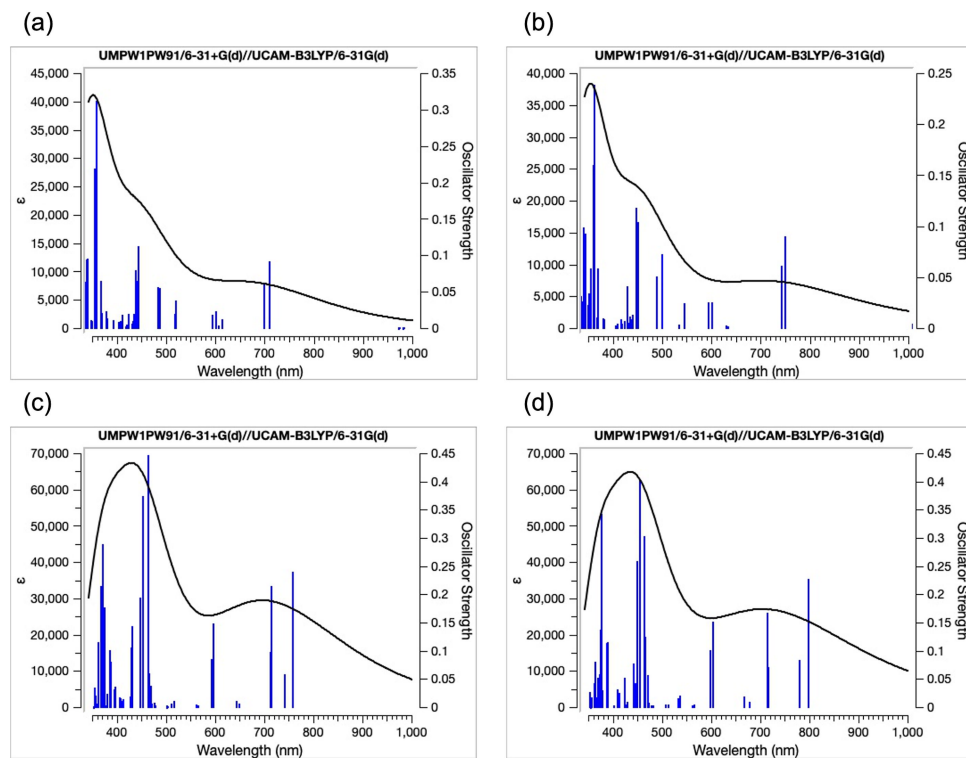

Fig. S34 Calculated absorption spectra of (a) 1-BR, (b) 2-BR, (c) 3-BR, and (d) 4-BR.

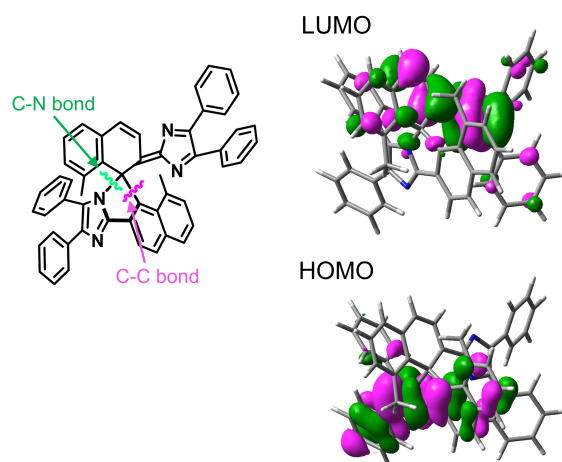

Fig. S35 HOMO and LUMO of 5MR of 2.

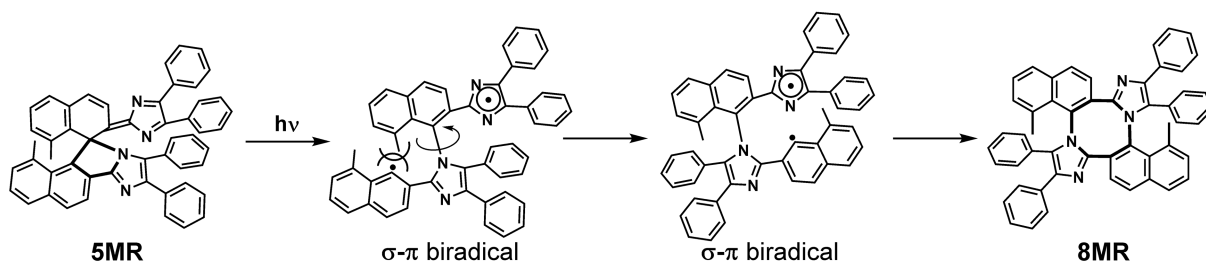

Fig. S36 Plausible reaction mechanism for the generation of 8MR of 2.

**Table S4.** Standard Orientation of the Optimized Geometry for 5MR of **1**.

|   | X          | Y          | Z          |   | X          | Y          | Z          |   | X          | Y          | Z          |
|---|------------|------------|------------|---|------------|------------|------------|---|------------|------------|------------|
| C | -1.3757420 | -1.1855110 | -3.5882610 | C | 0.5042300  | 4.3883480  | -2.4097480 | H | 3.0983210  | -3.2176360 | 2.9881760  |
| C | -1.6468970 | -2.5128240 | -3.7737000 | C | 0.9461300  | 5.6917040  | -2.5864700 | H | 5.1906010  | -3.6470150 | 4.2520390  |
| C | -1.9960000 | -3.3580870 | -2.6861740 | C | 0.6597540  | 6.6655750  | -1.6353100 | H | 7.0724900  | -0.3734970 | 2.2128860  |
| C | -2.0722310 | -2.8285120 | -1.3621950 | C | -0.0822360 | 6.3222500  | -0.5111040 | H | 4.9978100  | 0.0330510  | 0.9463470  |
| C | -1.7878690 | -1.4526020 | -1.2026060 | C | -0.5286700 | 5.0188000  | -0.3332900 | H | 4.7897370  | -2.0248060 | -0.7535560 |
| C | -1.4535830 | -0.6645710 | -2.2836330 | C | 3.9147640  | -1.5829460 | 1.8706060  | H | 6.2613140  | -1.5608940 | -2.6727490 |
| C | -1.8207550 | -0.6086480 | 0.0949050  | C | 3.3140020  | -0.5560920 | -1.3098750 | H | 3.4998670  | 1.4107320  | -4.0747910 |
| C | -0.7939070 | -1.0830000 | 1.1282490  | C | 3.9800230  | -2.6098400 | 2.8179540  | H | 2.0102020  | 0.9263090  | -2.1570600 |
| C | -1.2361190 | -1.5138600 | 2.4297040  | C | 5.1502400  | -2.8412480 | 3.5256120  | C | -2.2711780 | -4.7331130 | -2.8900300 |
| C | -2.5263430 | -1.4603550 | 2.8043020  | C | 6.2684260  | -2.0418200 | 3.3072040  | C | -4.8987160 | -0.8863390 | 2.3733950  |
| C | -3.5740600 | -0.9662400 | 1.9284280  | C | 6.2080470  | -1.0087620 | 2.3787950  | C | -4.2648460 | -0.0520980 | -0.1910750 |
| C | -3.2565530 | -0.5445880 | 0.6314100  | C | 5.0402670  | -0.7805930 | 1.6618170  | C | -5.5752550 | 0.0292040  | 0.2613960  |
| C | -1.2003530 | 0.6781110  | -1.7949860 | C | 4.5113010  | -1.2603820 | -1.4698570 | C | -5.8953260 | -0.3912480 | 1.5497580  |
| C | 0.5419790  | -1.0954330 | 0.8461270  | C | 5.3381250  | -1.0018670 | -2.5557170 | C | -2.4166480 | -3.7021610 | -0.2981560 |
| N | 1.5019760  | -1.4941150 | 1.7787540  | C | 4.9822580  | -0.0365300 | -3.4905910 | C | -2.6746670 | -5.0257260 | -0.5344150 |
| C | 2.6418380  | -1.3304250 | 1.1759250  | C | 3.7865210  | 0.6609660  | -3.3439820 | C | -2.6034090 | -5.5503410 | -1.8438160 |
| C | 2.3836450  | -0.8369890 | -0.2063480 | C | 2.9528570  | 0.4004040  | -2.2668900 | H | -2.2110420 | -5.1283480 | -3.9002950 |
| N | 1.0999000  | -0.6960950 | -0.3590200 | H | -1.1026260 | -0.5372620 | -4.4134600 | H | -5.1339510 | -1.2143940 | 3.3820340  |
| N | -0.7542410 | 1.8183220  | -2.2465440 | H | -1.5959830 | -2.9480800 | -4.7675790 | H | -4.0211230 | 0.2769840  | -1.1958970 |
| C | -0.6829210 | 2.6340050  | -1.1314710 | H | -0.4661510 | -1.8614380 | 3.1069230  | H | -6.3471070 | 0.4189860  | -0.3943180 |
| C | -1.0892440 | 1.9495650  | 0.0063650  | H | -2.8133750 | -1.7781010 | 3.8026670  | H | -6.9184190 | -0.3318620 | 1.9069540  |
| N | -1.4410930 | 0.7002660  | -0.4586350 | H | 1.0050110  | 2.5579560  | 1.5593340  | H | -2.4696480 | -3.3161320 | 0.7127500  |
| C | -1.1236260 | 2.3178490  | 1.4350890  | H | 0.9908040  | 3.1795440  | 3.9555040  | H | -2.9354130 | -5.6797740 | 0.2919000  |
| C | -0.2317800 | 4.0287710  | -1.2754580 | H | -3.2806030 | 2.7729510  | 4.0236410  | H | -2.8106790 | -6.6018790 | -2.0153550 |
| C | -2.3280330 | 2.3825420  | 2.1411590  | H | -3.2605360 | 2.1724640  | 1.6280400  | H | 5.6325020  | 0.1683350  | -4.3356650 |
| C | 0.0567830  | 2.9576000  | 3.4487600  | H | 0.7136650  | 3.6269880  | -3.1525180 | H | 7.1838060  | -2.2220160 | 3.8624520  |
| C | -1.1464720 | 3.0143080  | 4.1447040  | H | 1.5179660  | 5.9490380  | -3.4733400 | H | 1.0061900  | 7.6854240  | -1.7728050 |
| C | -2.3372360 | 2.7255520  | 3.4882070  | H | -0.3251680 | 7.0760390  | 0.2320780  | H | -1.1553690 | 3.2844760  | 5.1962670  |
| C | 0.0685550  | 2.6090590  | 2.1050430  | H | -1.1232930 | 4.7740030  | 0.5389750  |   |            |            |            |

SCF Done: E(RCAM-B3LYP) = -2142.41471162 A.U.

Low frequencies --- -0.0003 -0.0002 0.0008 0.3711 1.5802 2.4193  
 Zero-point correction = 0.689400 (Hartree/Particle)  
 Thermal correction to Energy = 0.728970  
 Thermal correction to Enthalpy = 0.729915  
 Thermal correction to Gibbs Free Energy = 0.613562  
 Sum of electronic and zero-point Energies = -2141.725312  
 Sum of electronic and thermal Energies = -2141.685741  
 Sum of electronic and thermal Enthalpies = -2141.684797  
 Sum of electronic and thermal Free Energies = -2141.801150

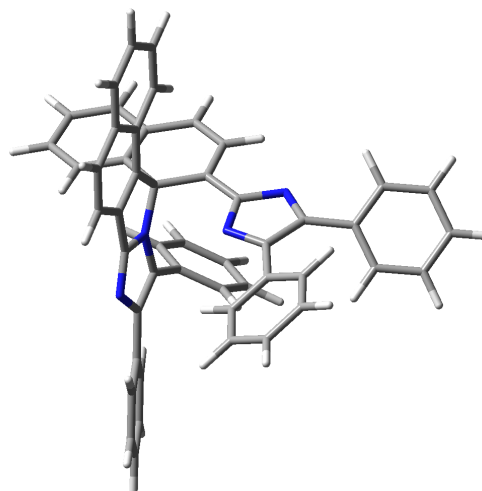

**Table S5.** Standard Orientation of the Optimized Geometry for 6MR of **1**.

|   | X          | Y          | Z          |   | X          | Y          | Z          |   | X          | Y          | Z          |
|---|------------|------------|------------|---|------------|------------|------------|---|------------|------------|------------|
| C | -1.4152240 | -0.4905570 | 2.7739370  | C | 3.8143070  | -0.8011700 | 1.9889090  | H | 2.4924740  | 0.5861870  | -3.5072280 |
| C | -2.5074060 | -0.2117990 | 3.5462200  | C | 5.0017360  | -1.0156560 | 2.6738570  | H | 4.7467270  | 0.8300060  | -4.5154220 |
| C | -3.6822480 | 0.3132850  | 2.9613420  | C | 5.2652360  | -2.2584610 | 3.2417200  | H | 5.9929990  | 3.1488800  | -1.1263950 |
| C | -3.7502700 | 0.4692180  | 1.5473360  | C | 4.3372700  | -3.2864580 | 3.1194950  | H | 3.7416010  | 2.9320630  | -0.1470940 |
| C | -2.6534400 | 0.0150080  | 0.7413180  | C | 3.1529260  | -3.0783660 | 2.4234750  | H | 2.0100650  | 4.4729520  | -1.7403050 |
| C | -1.4805910 | -0.3538550 | 1.3737430  | C | 2.9614370  | 1.7594340  | -1.7771650 | H | 2.4007620  | 6.7948690  | -1.0083770 |
| C | -2.6643700 | 0.0217140  | -0.7475530 | C | 1.1377370  | 3.8537500  | 0.1296280  | H | 0.7013180  | 5.8763240  | 2.8239900  |
| C | -1.5002160 | 0.3890600  | -1.3962930 | C | 3.2622730  | 1.1608310  | -3.0040030 | H | 0.2879840  | 3.5444240  | 2.0698320  |
| C | -1.4568790 | 0.5323610  | -2.7960940 | C | 4.5267770  | 1.2927530  | -3.5584160 | C | -4.7699670 | 0.7388460  | 3.7674730  |
| C | -2.5604180 | 0.2580650  | -3.5534210 | C | 5.5118040  | 2.0119040  | -2.8875490 | C | -4.8264560 | -0.6908040 | -3.7437920 |
| C | -3.7264930 | -0.2685070 | -2.9527380 | C | 5.2257820  | 2.5960200  | -1.6593140 | C | -4.8969430 | -1.1076840 | -0.9905150 |
| C | -3.7739820 | -0.4277370 | -1.5382710 | C | 3.9561840  | 2.4754470  | -1.1067440 | C | -5.9279250 | -1.5340200 | -1.7831090 |
| C | -0.2304870 | -0.5499230 | 0.5244690  | C | 1.7297500  | 4.7750840  | -0.7369610 | C | -5.9082640 | -1.3033420 | -3.1766470 |
| C | -0.2358740 | 0.5737940  | -0.5675950 | C | 1.9478610  | 6.0839220  | -0.3244290 | C | -4.8794590 | 1.1507930  | 1.0146570  |
| N | 0.9743000  | 0.4636630  | -1.3592150 | C | 1.5844480  | 6.4815800  | 0.9571710  | C | -5.8980860 | 1.5804350  | 1.8212970  |
| C | 1.6230040  | 1.5548380  | -1.1871250 | C | 0.9907000  | 5.5688330  | 1.8239520  | C | -5.8589250 | 1.3519360  | 3.2147600  |
| C | 0.8316760  | 2.4721710  | -0.2930080 | C | 0.7622380  | 4.2639750  | 1.4115710  | H | -4.7053390 | 0.5869870  | 4.8414560  |
| N | -0.2392530 | 1.8805660  | 0.0798960  | H | -0.4830430 | -0.8020900 | 3.2290190  | H | -4.7772680 | -0.5368080 | -4.8182660 |
| N | 0.9828650  | -0.4518960 | 1.3136650  | H | -2.4649980 | -0.3323920 | 4.6249590  | H | -4.9243790 | -1.3094340 | 0.0721490  |
| C | 1.6042860  | -1.5616390 | 1.1638220  | H | -0.5326940 | 0.8487060  | -3.2641410 | H | -6.7655760 | -2.0612390 | -1.3369860 |
| C | 0.8191650  | -2.4570320 | 0.2429480  | H | -2.5345360 | 0.3833830  | -4.6320880 | H | -6.7392900 | -1.6329290 | -3.7925220 |
| N | -0.2492160 | -1.8562690 | -0.1231690 | H | 3.2761800  | -3.4857610 | -0.3797240 | H | -4.9211350 | 1.3522820  | -0.0475220 |
| C | 1.1518120  | -3.8126710 | -0.2381060 | H | 3.7570060  | -5.7348610 | -1.2660780 | H | -6.7405290 | 2.1093580  | 1.3864320  |
| C | 2.8822660  | -1.8328850 | 1.8522810  | H | -0.4250120 | -6.6882340 | -1.1273250 | H | -6.6804220 | 1.6841630  | 3.8419140  |
| C | 0.1145080  | -4.7210380 | -0.4662080 | H | -0.9037360 | -4.4126180 | -0.2563890 | H | 1.7604820  | 7.5032430  | 1.2797440  |
| C | 2.7339940  | -5.4555580 | -1.0341090 | H | 3.5935830  | 0.1646240  | 1.5479300  | H | 6.5020320  | 2.1133810  | -3.3209850 |
| C | 1.6987530  | -6.3592860 | -1.2434410 | H | 5.7236080  | -0.2103010 | 2.7669320  | H | 6.1933240  | -2.4249880 | 3.7799450  |
| C | 0.3877040  | -5.9883660 | -0.9597250 | H | 4.5343350  | -4.2553180 | 3.5674770  | H | 1.9121600  | -7.3506340 | -1.6314530 |
| C | 2.4647010  | -4.1887670 | -0.5304330 | H | 2.4319830  | -3.8835430 | 2.3325840  |   |            |            |            |

SCF Done: E(RCAM-B3LYP) = -2142.40168391 A.U.

Low frequencies --- -1.1936 -0.0004 0.0002 0.0006 0.8587 0.9489  
 Zero-point correction = 0.689127 (Hartree/Particle)  
 Thermal correction to Energy = 0.728333  
 Thermal correction to Enthalpy = 0.729277  
 Thermal correction to Gibbs Free Energy = 0.614087  
 Sum of electronic and zero-point Energies = -2141.712557  
 Sum of electronic and thermal Energies = -2141.673351  
 Sum of electronic and thermal Enthalpies = -2141.672407  
 Sum of electronic and thermal Free Energies = -2141.787597

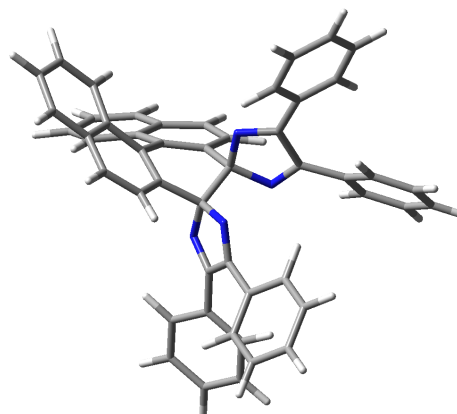

**Table S6.** Standard Orientation of the Optimized Geometry for BR of **1**.

|   | X          | Y          | Z          |   | X          | Y          | Z          |   | X          | Y          | Z          |
|---|------------|------------|------------|---|------------|------------|------------|---|------------|------------|------------|
| C | -0.4121670 | 1.7391710  | 2.8103930  | C | -3.9208280 | -2.1186730 | 3.4780640  | H | 4.1466730  | -1.6258150 | -3.5882920 |
| C | 0.5148570  | 2.6421260  | 3.2230460  | C | -4.8652270 | -2.8181480 | 4.2127720  | H | 5.4824650  | -3.5255500 | -4.4651790 |
| C | 1.2811060  | 3.3775750  | 2.2793770  | C | -6.1154850 | -3.0923860 | 3.6644030  | H | 5.2126460  | -5.4559130 | -0.6416310 |
| C | 1.0738430  | 3.1460230  | 0.8926420  | C | -6.4153950 | -2.6586580 | 2.3778310  | H | 3.9030780  | -3.5584180 | 0.2265700  |
| C | 0.1119430  | 2.1765470  | 0.4681430  | C | -5.4682050 | -1.9664020 | 1.6348040  | H | 5.5528670  | -1.6225530 | 0.5399760  |
| C | -0.6391350 | 1.4884130  | 1.4222190  | C | 3.9643020  | -2.4471530 | -1.6184060 | H | 6.7234760  | -1.9196700 | 2.6842970  |
| C | -0.0888390 | 1.9897730  | -1.0021200 | C | 3.7084440  | -0.9579130 | 1.4374100  | H | 3.2282840  | -0.5785320 | 4.7834910  |
| C | 0.6562780  | 1.0812630  | -1.7547650 | C | 4.4015370  | -2.4636650 | -2.9493710 | H | 2.0590270  | -0.2632740 | 2.6194130  |
| C | 0.4180000  | 0.9673410  | -3.1578050 | C | 5.1414030  | -3.5305140 | -3.4345360 | C | 2.2357230  | 4.3349100  | 2.6904720  |
| C | -0.5078200 | 1.7399040  | -3.7826900 | C | 5.4430830  | -4.6074700 | -2.6049610 | C | -2.2257680 | 3.5163730  | -3.6885540 |
| C | -1.2673520 | 2.6937430  | -3.0532940 | C | 4.9960230  | -4.6113870 | -1.2883540 | C | -1.8224450 | 3.7808590  | -0.9434390 |
| C | -1.0538320 | 2.8205980  | -1.6532310 | C | 4.2632540  | -3.5395530 | -0.7956970 | C | -2.7442260 | 4.5659340  | -1.5851970 |
| C | -1.6491450 | 0.5044410  | 1.0983140  | C | 5.0326010  | -1.4137230 | 1.4672860  | C | -2.9508180 | 4.4344320  | -2.9739350 |
| C | 1.6656530  | 0.2092910  | -1.1948820 | C | 5.6946150  | -1.5734710 | 2.6772240  | C | 1.8453350  | 3.8955050  | -0.0338580 |
| N | 2.3293990  | -0.6973260 | -1.9806930 | C | 5.0470650  | -1.2833590 | 3.8730690  | C | 2.7639000  | 4.8187130  | 0.3924730  |
| C | 3.1446270  | -1.3243030 | -1.1565240 | C | 3.7354230  | -0.8154590 | 3.8532910  | C | 2.9638880  | 5.0432260  | 1.7700380  |
| C | 2.9871310  | -0.7249570 | 0.1868510  | C | 3.0732870  | -0.6450320 | 2.6482010  | H | 2.3814750  | 4.4986700  | 3.7545510  |
| N | 2.0466320  | 0.2007950  | 0.1104470  | H | -1.0131850 | 1.1849300  | 3.5202330  | H | -2.3751980 | 3.4069090  | -4.7591760 |
| N | -2.3681280 | -0.1179810 | 2.0864000  | H | 0.6746350  | 2.8235470  | 4.2821880  | H | -1.6739370 | 3.8895450  | 0.1242650  |
| C | -3.1978010 | -0.9178080 | 1.4465630  | H | 1.0029300  | 0.2380400  | -3.7036160 | H | -3.3199960 | 5.2931590  | -1.0214980 |
| C | -2.9295680 | -0.7906120 | -0.0023460 | H | -0.6759550 | 1.6428870  | -4.8515960 | H | -3.6834230 | 5.0609400  | -3.4732970 |
| N | -1.9814570 | 0.1166160  | -0.1620530 | H | -3.9465220 | -3.3326380 | -0.0987760 | H | 1.7022860  | 3.7291070  | -1.0948600 |
| C | -3.4806010 | -1.5091410 | -1.1505470 | H | -4.7888200 | -4.5039530 | -2.0932210 | H | 3.3426310  | 5.3801010  | -0.3342300 |
| C | -4.2047330 | -1.6950840 | 2.1730610  | H | -3.9266160 | -1.0504750 | -4.4911930 | H | 3.6945860  | 5.7761360  | 2.0978780  |
| C | -3.4615460 | -0.8858120 | -2.4066820 | H | -3.0637400 | 0.1198380  | -2.4814390 | H | 5.5652040  | -1.4137040 | 4.8182710  |
| C | -4.4283370 | -3.4837970 | -2.1811920 | H | -2.9487270 | -1.8860180 | 3.8976510  | H | 6.0199150  | -5.4443170 | -2.9866210 |
| C | -4.4264420 | -2.8478760 | -3.4177890 | H | -4.6281400 | -3.1493540 | 5.2190870  | H | -6.8558430 | -3.6377220 | 4.2416200  |
| C | -3.9387600 | -1.5478990 | -3.5263400 | H | -7.3941290 | -2.8542350 | 1.9509560  | H | -4.7965180 | -3.3663380 | -4.2970240 |
| C | -3.9606010 | -2.8214610 | -1.0542070 | H | -5.7160190 | -1.6167200 | 0.6391420  |   |            |            |            |

SCF Done: E(UCAM-B3LYP) = -2142.39286414 A.U.  
 S\*\*2 before annihilation 1.1135, after 0.9429

Low frequencies --- -1.1300 -0.2380 -0.0003 -0.0002 0.0005 1.0620  
 Zero-point correction = 0.685364 (Hartree/Particle)  
 Thermal correction to Energy = 0.725734  
 Thermal correction to Enthalpy = 0.726678  
 Thermal correction to Gibbs Free Energy = 0.606621  
 Sum of electronic and zero-point Energies = -2141.707500  
 Sum of electronic and thermal Energies = -2141.667130  
 Sum of electronic and thermal Enthalpies = -2141.666186  
 Sum of electronic and thermal Free Energies = -2141.786243

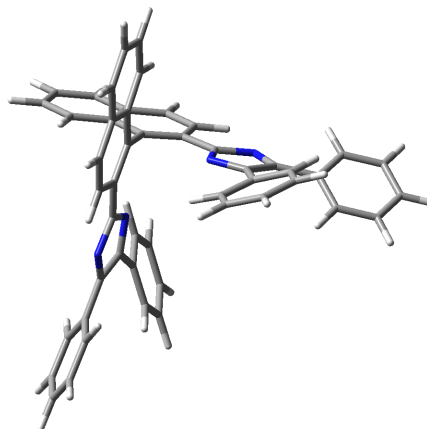

**Table S7.** Standard Orientation of the Optimized Geometry for TS1 of 1.

|   | X          | Y          | Z          |   | X          | Y          | Z          |   | X          | Y          | Z          |
|---|------------|------------|------------|---|------------|------------|------------|---|------------|------------|------------|
| C | -1.6339160 | 1.1655650  | 2.6196740  | C | 3.5869400  | 0.4750140  | 2.0051010  | H | 2.6676050  | -0.9604650 | -2.9526510 |
| C | -2.6980810 | 1.9478000  | 2.9651140  | C | 4.8691070  | 0.6300790  | 2.5066150  | H | 5.0672310  | -1.2477630 | -3.5138120 |
| C | -3.8264760 | 2.0394070  | 2.1180170  | C | 5.5488190  | -0.4626690 | 3.0381050  | H | 5.9958190  | 2.2908740  | -1.2709400 |
| C | -3.8625270 | 1.2676400  | 0.9216350  | C | 4.9345550  | -1.7095460 | 3.0697970  | H | 3.6140670  | 2.5797100  | -0.7322170 |
| C | -2.7891230 | 0.3672130  | 0.6327850  | C | 3.6529910  | -1.8709960 | 2.5604030  | H | 2.3095470  | 3.6211960  | -2.7163470 |
| C | -1.6697600 | 0.3717420  | 1.4490050  | C | 2.9721390  | 0.8387180  | -1.8294230 | H | 2.7728510  | 6.0346770  | -2.5028180 |
| C | -2.7800650 | -0.4775540 | -0.5938410 | C | 1.0714340  | 3.5313930  | -0.9558500 | H | 0.3384090  | 6.1915600  | 1.0282550  |
| C | -1.6650070 | -0.4485390 | -1.4152320 | C | 3.4059120  | -0.2485090 | -2.6019700 | H | -0.1382700 | 3.7632890  | 0.7963860  |
| C | -1.6119660 | -1.2384520 | -2.5867070 | C | 4.7481070  | -0.4066560 | -2.9061360 | C | -4.8996220 | 2.9164500  | 2.4184820  |
| C | -2.6545520 | -2.0496690 | -2.9292540 | C | 5.6854060  | 0.5098020  | -2.4347650 | C | -4.8228690 | -3.0848970 | -2.3726830 |
| C | -3.7748160 | -2.1764730 | -2.0764460 | C | 5.2693880  | 1.5809620  | -1.6538420 | C | -4.9086980 | -1.6496220 | 0.0153780  |
| C | -3.8277620 | -1.4084280 | -0.8781870 | C | 3.9233120  | 1.7477730  | -1.3527020 | C | -5.8925470 | -2.5511380 | -0.2869610 |
| C | -0.4298810 | -0.3481710 | 1.0792130  | C | 1.8877780  | 4.1798990  | -1.8875050 | C | -5.8625690 | -3.2679840 | -1.5042180 |
| C | -0.4490050 | 0.3140340  | -1.0524350 | C | 2.1449330  | 5.5396490  | -1.7685600 | C | -4.9540680 | 1.4754430  | 0.0328440  |
| N | 0.7767200  | -0.1190590 | -1.5062010 | C | 1.5940880  | 6.2650080  | -0.7176350 | C | -5.9628490 | 2.3477540  | 0.3387530  |
| C | 1.5460140  | 0.9399780  | -1.5036350 | C | 0.7743780  | 5.6277580  | 0.2094000  | C | -5.9486240 | 3.0667540  | 1.5548820  |
| C | 0.7218970  | 2.1089420  | -1.0821290 | C | 0.5076410  | 4.2717840  | 0.0889330  | H | -4.8602170 | 3.4813810  | 3.3457980  |
| N | -0.4785800 | 1.6913260  | -0.8099890 | H | -0.7406480 | 1.1383920  | 3.2317770  | H | -4.7710140 | -3.6472130 | -3.3009470 |
| N | 0.7765460  | 0.1329190  | 1.5425040  | H | -2.6757780 | 2.5365100  | 3.8778610  | H | -4.9424930 | -1.1172790 | 0.9572350  |
| C | 1.5889620  | -0.8930490 | 1.5257970  | H | -0.7223310 | -1.1872820 | -3.2024690 | H | -6.7015870 | -2.7205940 | 0.4168120  |
| C | 0.8325420  | -2.0766810 | 1.0253900  | H | -2.6182480 | -2.6381180 | -3.8415830 | H | -6.6553620 | -3.9720500 | -1.7373240 |
| N | -0.3976320 | -1.7186140 | 0.8069460  | H | 3.2170310  | -2.8328020 | -0.0546980 | H | -4.9758390 | 0.9416970  | -0.9084580 |
| C | 1.2974730  | -3.4357950 | 0.7134080  | H | 3.9131220  | -5.1241370 | -0.6493340 | H | -6.7794550 | 2.4925830  | -0.3616950 |
| C | 2.9661220  | -0.7812620 | 2.0122590  | H | 0.1487740  | -6.6343030 | 0.7532120  | H | -6.7609870 | 3.7471470  | 1.7908360  |
| C | 0.4320890  | -4.5153910 | 0.9166040  | H | -0.5505460 | -4.3242820 | 1.3334640  | H | 1.7992330  | 7.3270440  | -0.6237400 |
| C | 2.9394710  | -4.9568800 | -0.1992020 | H | 3.0390270  | 1.3197770  | 1.6049000  | H | 6.7372450  | 0.3849800  | -2.6729020 |
| C | 2.0816120  | -6.0276170 | 0.0266530  | H | 5.3411130  | 1.6074720  | 2.4863860  | H | 6.5528620  | -0.3403700 | 3.4327440  |
| C | 0.8256400  | -5.8028340 | 0.5829280  | H | 5.4524930  | -2.5617500 | 3.4984310  | H | 2.3881660  | -7.0354740 | -0.2362330 |
| C | 2.5529600  | -3.6672950 | 0.1430530  | H | 3.1772450  | -2.8431180 | 2.6058030  |   |            |            |            |

SCF Done: E(UCAM-B3LYP) = -2142.36195694 A.U.  
 S\*\*2 before annihilation 0.4311, after 0.0757

Low frequencies --- -619.4875 -0.5220 -0.4702 0.0002 0.0006 0.0009

\*\*\*\*\* 1 imaginary frequencies (negative Signs) \*\*\*\*\*

Zero-point correction = 0.685672 (Hartree/Particle)  
 Thermal correction to Energy = 0.725033  
 Thermal correction to Enthalpy = 0.725978  
 Thermal correction to Gibbs Free Energy = 0.610965  
 Sum of electronic and zero-point Energies = -2141.676285  
 Sum of electronic and thermal Energies = -2141.636923  
 Sum of electronic and thermal Enthalpies = -2141.635979  
 Sum of electronic and thermal Free Energies = -2141.750991

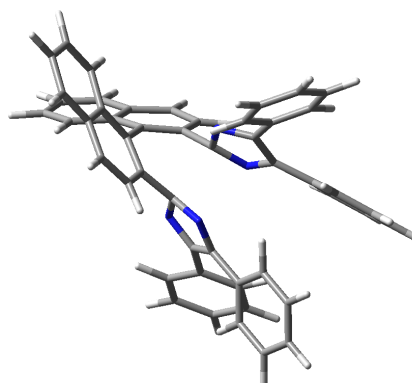



**Table S8.** Standard Orientation of the Optimized Geometry for TS2 of 1.

|   | X          | Y          | Z          |   | X          | Y          | Z          |   | X          | Y          | Z          |
|---|------------|------------|------------|---|------------|------------|------------|---|------------|------------|------------|
| C | -0.5306500 | 2.1476820  | 2.9778610  | C | -4.4184640 | -1.9955580 | 3.1078120  | H | 4.7080700  | -0.6728140 | -3.1586800 |
| C | 0.3938110  | 3.1325690  | 3.1501150  | C | -5.4754310 | -2.7497620 | 3.5944030  | H | 6.5342230  | -2.1094090 | -4.0316360 |
| C | 1.1018270  | 3.6800470  | 2.0423230  | C | -6.4561950 | -3.2222980 | 2.7270720  | H | 6.0666440  | -4.7213900 | -0.6587850 |
| C | 0.8443640  | 3.1970290  | 0.7274380  | C | -6.3752670 | -2.9263450 | 1.3700280  | H | 4.2686220  | -3.2796320 | 0.2118540  |
| C | -0.1125390 | 2.1529380  | 0.5732530  | C | -5.3196380 | -2.1705780 | 0.8796410  | H | 5.4387160  | -1.1084550 | 1.1029070  |
| C | -0.7719630 | 1.6467780  | 1.6761470  | C | 4.3876390  | -1.8614300 | -1.4056070 | H | 6.3151200  | -1.6086770 | 3.3491290  |
| C | -0.5052420 | 1.6237890  | -0.7723760 | C | 3.3793170  | -1.0313940 | 1.7344340  | H | 2.3296840  | -1.4830740 | 4.9371580  |
| C | 0.4837990  | 0.9418100  | -1.5893000 | C | 5.0257870  | -1.5542980 | -2.6132560 | H | 1.4545610  | -0.9595850 | 2.6748030  |
| C | 0.3332230  | 0.9169660  | -3.0109890 | C | 6.0408920  | -2.3640990 | -3.0987560 | C | 2.0473960  | 4.7161360  | 2.2213020  |
| C | -0.6852420 | 1.5617530  | -3.6253050 | C | 6.4241040  | -3.5023790 | -2.3947120 | C | -2.6832570 | 3.0131090  | -3.5335400 |
| C | -1.6579960 | 2.3096160  | -2.8773250 | C | 5.7834490  | -3.8266050 | -1.2041770 | C | -2.5096280 | 3.1363330  | -0.7641520 |
| C | -1.5697850 | 2.3605100  | -1.4666440 | C | 4.7733440  | -3.0118080 | -0.7093410 | C | -3.5126870 | 3.8131120  | -1.4259040 |
| C | -1.6449160 | 0.5482470  | 1.3734430  | C | 4.7528550  | -1.2071900 | 1.9363300  | C | -3.6032190 | 3.7523080  | -2.8219260 |
| C | 1.5435950  | 0.2240980  | -1.0202070 | C | 5.2465920  | -1.4829750 | 3.2047210  | C | 1.5253880  | 3.8002660  | -0.3605100 |
| N | 2.4863890  | -0.4206930 | -1.8022190 | C | 4.3783120  | -1.5907920 | 4.2852850  | C | 2.4384950  | 4.8009420  | -0.1519450 |
| C | 3.2843490  | -1.0077700 | -0.9485810 | C | 3.0112070  | -1.4064520 | 4.0957010  | C | 2.7078740  | 5.2636700  | 1.1524390  |
| C | 2.8177900  | -0.6847070 | 0.4254680  | C | 2.5149140  | -1.1208280 | 2.8335300  | H | 2.2395880  | 5.0734820  | 3.2291640  |
| N | 1.7399750  | 0.0539280  | 0.3285890  | H | -1.0831030 | 1.7244440  | 3.8095480  | H | -2.7357170 | 2.9662460  | -4.6176140 |
| N | -2.5834250 | -0.0173310 | 2.1223140  | H | 0.6036520  | 3.5246290  | 4.1411900  | H | -2.4481780 | 3.1964690  | 0.3156720  |
| C | -3.2118580 | -0.8684410 | 1.2704790  | H | 1.0701170  | 0.3580510  | -3.5736930 | H | -4.2312490 | 4.3963010  | -0.8594060 |
| C | -2.5893530 | -0.8149670 | -0.0128260 | H | -0.7803690 | 1.5321070  | -4.7067890 | H | -4.3907490 | 4.2893190  | -3.3410170 |
| N | -1.5721350 | 0.0549730  | 0.1029830  | H | -2.7214380 | -3.5125070 | -0.0807350 | H | 1.3165920  | 3.4661770  | -1.3706310 |
| C | -2.7760050 | -1.6750610 | -1.1959820 | H | -2.9934580 | -4.9577380 | -2.0619550 | H | 2.9525050  | 5.2467280  | -0.9977830 |
| C | -4.3203070 | -1.7003630 | 1.7415000  | H | -3.1296170 | -1.4816580 | -4.5729030 | H | 3.4304710  | 6.0591160  | 1.3050980  |
| C | -2.8906350 | -1.1186010 | -2.4717890 | H | -2.8752030 | -0.0408390 | -2.5830210 | H | 4.7660590  | -1.8120430 | 5.2749800  |
| C | -2.9693120 | -3.8788230 | -2.1814500 | H | -3.6521580 | -1.6148900 | 3.7733300  | H | 7.2170890  | -4.1378940 | -2.7767590 |
| C | -3.0810310 | -3.3138030 | -3.4481970 | H | -5.5349990 | -2.9720530 | 4.6556360  | H | -7.2828980 | -3.8143760 | 3.1078750  |
| C | -3.0407450 | -1.9320420 | -3.5887760 | H | -7.1438390 | -3.2794180 | 0.6891670  | H | -3.1984640 | -3.9490440 | -4.3208560 |
| C | -2.8173460 | -3.0677320 | -1.0656280 | H | -5.2755680 | -1.9293440 | -0.1760480 |   |            |            |            |

SCF Done: E(UCAM-B3LYP) = -2142.35893568 A.U.  
 S\*\*2 before annihilation 0.5870, after 0.2201

Low frequencies ----1491.0814 -1.5587 -0.0006 0.0001 0.0005 0.6964

\*\*\*\*\* 1 imaginary frequencies (negative Signs) \*\*\*\*\*

Zero-point correction = 0.684087 (Hartree/Particle)  
 Thermal correction to Energy = 0.723940  
 Thermal correction to Enthalpy = 0.724884  
 Thermal correction to Gibbs Free Energy = 0.607262  
 Sum of electronic and zero-point Energies = -2141.674849  
 Sum of electronic and thermal Energies = -2141.634996  
 Sum of electronic and thermal Enthalpies = -2141.634052  
 Sum of electronic and thermal Free Energies = -2141.751674

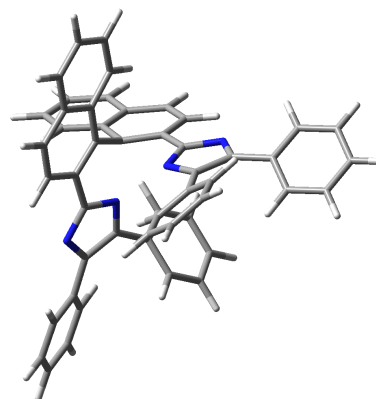

**Table S9.** Standard Orientation of the Optimized Geometry for 5MR of **2**.

|   | X          | Y          | Z          |   | X          | Y          | Z          |   | X          | Y          | Z          |
|---|------------|------------|------------|---|------------|------------|------------|---|------------|------------|------------|
| C | -0.6630340 | -1.7602890 | -3.2912630 | C | -0.0743720 | 6.4294480  | -2.6852890 | H | 5.1877710  | -1.6861940 | -0.1527680 |
| C | -0.7759890 | -3.1154460 | -3.3487280 | C | -0.8979440 | 6.1741430  | -1.5951470 | H | 6.6771470  | -1.7078910 | -2.1162470 |
| C | -1.1192900 | -3.8735710 | -2.2007920 | C | -1.1644490 | 4.8678930  | -1.2041730 | H | 3.7154950  | 0.4095980  | -4.3889210 |
| C | -1.3549500 | -3.2500780 | -0.9232260 | C | 4.1827400  | -0.3919240 | 2.1834550  | H | 2.2118610  | 0.4141530  | -2.4183590 |
| C | -1.2849510 | -1.8162200 | -0.9092920 | C | 3.6070060  | -0.6155460 | -1.1509170 | C | -1.2163310 | -5.2788390 | -2.3543610 |
| C | -0.9359500 | -1.1397670 | -2.0668980 | C | 4.3157970  | -0.9863630 | 3.4426530  | C | -4.6076490 | -0.6148300 | 2.5960990  |
| C | -1.5861550 | -0.7532140 | 0.2119920  | C | 5.4752440  | -0.8136240 | 4.1838720  | C | -4.1518360 | -0.8340290 | -0.1622940 |
| C | -0.5201240 | -0.7373930 | 1.3279170  | C | 6.5143890  | -0.0342330 | 3.6838910  | C | -5.4434930 | -0.7960640 | 0.3750600  |
| C | -0.9235850 | -0.6076540 | 2.7016700  | C | 6.3851480  | 0.5728620  | 2.4399620  | C | -5.6842190 | -0.6933190 | 1.7356950  |
| C | -2.2150060 | -0.5518670 | 3.0544750  | C | 5.2284760  | 0.3945030  | 1.6914090  | C | -1.6192880 | -4.1335890 | 0.1841770  |
| C | -3.3027250 | -0.6490690 | 2.0995720  | C | 4.8672500  | -1.2157800 | -1.0756350 | C | -1.7008760 | -5.4897400 | -0.0322300 |
| C | -3.0511170 | -0.7769280 | 0.7179680  | C | 5.7042140  | -1.2311460 | -2.1841350 | C | -1.5169120 | -6.0797570 | -1.2948380 |
| C | -0.9476090 | 0.2817580  | -1.8167690 | C | 5.2957850  | -0.6430970 | -3.3759140 | H | -1.0405030 | -5.6988710 | -3.3403150 |
| C | 0.8207440  | -0.7199890 | 1.0521760  | C | 4.0400220  | -0.0485340 | -3.4597720 | H | -4.7581400 | -0.5201180 | 3.6673640  |
| N | 1.7793820  | -0.6278320 | 2.0659010  | C | 3.1962490  | -0.0391300 | -2.3588320 | H | -6.2837890 | -0.8463700 | -0.3103570 |
| C | 2.9197190  | -0.5554840 | 1.4456870  | H | -0.3952060 | -1.1583950 | -4.1524120 | H | -6.7012870 | -0.6680980 | -2.1135480 |
| C | 2.6686110  | -0.6259340 | -0.0184440 | H | -0.5997650 | -3.6480220 | -4.2785200 | H | -1.9010590 | -6.1331700 | 0.8193840  |
| N | 1.3866320  | -0.7232550 | -0.2127070 | H | -0.1305850 | -0.5324910 | 3.4341910  | H | -1.5946170 | -7.1561460 | -1.4094530 |
| N | -0.6280710 | 1.3808920  | -2.4446410 | H | -2.4845990 | -0.4289400 | 4.0992010  | H | 5.9535960  | -0.6508770 | -4.2397220 |
| C | -0.8525590 | 2.3856060  | -1.5209080 | H | 0.4223960  | 2.9146340  | 1.4314220  | H | 7.4214150  | 0.1021200  | 4.2647810  |
| C | -1.3097720 | 1.8582940  | -0.3211560 | H | -0.0807170 | 3.9993340  | 3.5985420  | H | 0.1312750  | 7.4513440  | -2.9894050 |
| N | -1.3848790 | 0.4972530  | -0.5563850 | H | -4.2664750 | 3.2892710  | 2.9689120  | H | -2.4299270 | 4.1872440  | 4.3745390  |
| C | -1.6312400 | 2.4892230  | 0.9755750  | H | -3.7563930 | 2.2156380  | 0.8024810  | C | -4.0702270 | -0.9150490 | -1.6685410 |
| C | -0.6031070 | 3.7887980  | -1.8944410 | H | 0.6351300  | 3.2210030  | -3.5443810 | H | -3.4767150 | -0.1045650 | -2.0953840 |
| C | -2.9512970 | 2.6028690  | 1.4186390  | H | 1.1175790  | 5.5482400  | -4.2446190 | H | -3.6346470 | -1.8560610 | -2.0103980 |
| C | -0.8893550 | 3.6080110  | 2.9891020  | H | -1.3454460 | 6.9974620  | -1.0461210 | H | -5.0752870 | -0.8427340 | -2.0904970 |
| C | -2.2062100 | 3.7115240  | 3.4244250  | H | -1.8239350 | 4.6891080  | -0.3633580 | C | -1.7624400 | -3.6717890 | 1.6067370  |
| C | -3.2359030 | 3.2079630  | 2.6370040  | H | 3.4946150  | -1.5815990 | 3.8262840  | H | -0.8732160 | -3.1387710 | 1.9477750  |
| C | -0.6037950 | 2.9998050  | 1.7735540  | H | 5.5691110  | -1.2871980 | 5.1562650  | H | -2.6230580 | -3.0196690 | 1.7516420  |
| C | 0.2152860  | 4.0571250  | -2.9971610 | H | 7.1864540  | 1.1925730  | 2.0497980  | H | -1.8935900 | -4.5339770 | 2.2650820  |
| C | 0.4774960  | 5.3625850  | -3.3869810 | H | 5.1311620  | 0.8802760  | 0.7270720  |   |            |            |            |

SCF Done: E(RCAM-B3LYP) = -2220.97558791 A.U.

Low frequencies --- -1.6973 -1.1643 -0.0004 0.0002 0.0004 1.1804  
 Zero-point correction = 0.746280 (Hartree/Particle)  
 Thermal correction to Energy = 0.788810  
 Thermal correction to Enthalpy = 0.789754  
 Thermal correction to Gibbs Free Energy = 0.667799  
 Sum of electronic and zero-point Energies = -2220.229308  
 Sum of electronic and thermal Energies = -2220.186778  
 Sum of electronic and thermal Enthalpies = -2220.185834  
 Sum of electronic and thermal Free Energies = -2220.307789

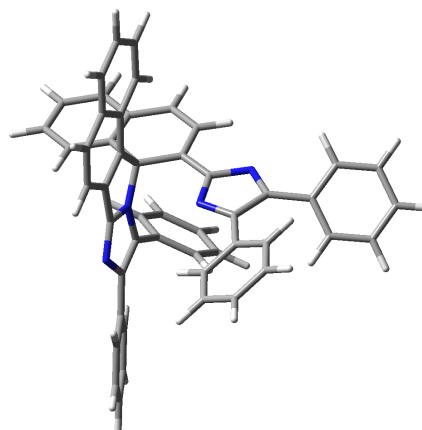

**Table S10.** Standard Orientation of the Optimized Geometry for 6MR of **2**.

|   | X          | Y          | Z          |   | X          | Y          | Z          |   | X          | Y          | Z          |
|---|------------|------------|------------|---|------------|------------|------------|---|------------|------------|------------|
| C | -1.2343750 | -0.6745840 | 2.7396970  | C | 5.4694680  | -2.3395840 | 3.1900890  | H | 2.1932900  | 4.5313170  | -1.6068530 |
| C | -2.3575710 | -0.4919490 | 3.4942200  | C | 4.5480490  | -3.3682720 | 3.0300630  | H | 2.5750320  | 6.8327350  | -0.8084120 |
| C | -3.5100530 | 0.1115490  | 2.9383580  | C | 3.3654450  | -3.1441400 | 2.3360680  | H | 0.8955470  | 5.7930610  | 3.0017640  |
| C | -3.5294550 | 0.4734630  | 1.5560450  | C | 3.1567700  | 1.8250290  | -1.7284320 | H | 0.4911590  | 3.4823090  | 2.1810290  |
| C | -2.4370860 | 0.0136910  | 0.7398780  | C | 1.3310950  | 3.8529860  | 0.2472060  | C | -4.6220710 | 0.3946910  | 3.7698870  |
| C | -1.2754560 | -0.4132600 | 1.3588160  | C | 3.4540970  | 1.2654230  | -2.9744180 | C | -4.6684760 | -0.3794230 | -3.7509450 |
| C | -2.4470060 | 0.0031540  | -0.7476850 | C | 4.7153630  | 1.4197290  | -3.5304140 | C | -4.6118910 | -1.3084210 | -1.0873520 |
| C | -1.2944660 | 0.4333010  | -1.3807700 | C | 5.7005440  | 2.1223830  | -2.8424870 | C | -5.6643610 | -1.5730710 | -1.9337340 |
| C | -1.2727030 | 0.6993530  | -2.7605930 | C | 5.4180310  | 2.6674860  | -1.5956440 | C | -5.7294170 | -1.0754610 | -3.2498370 |
| C | -2.4042670 | 0.5147690  | -3.5017490 | C | 4.1516380  | 2.5245410  | -1.0410570 | C | -4.5985300 | 1.3239220  | 1.1055080  |
| C | -3.5473320 | -0.0940020 | -2.9326100 | C | 1.9151530  | 4.8024430  | -0.5940950 | C | -5.6416110 | 1.5862190  | 1.9642300  |
| C | -3.5490280 | -0.4569710 | -1.5503760 | C | 2.1282790  | 6.0996850  | -0.1440330 | C | -5.6904010 | 1.0881330  | 3.2808920  |
| C | -0.0236020 | -0.5724400 | 0.5053550  | C | 1.7678890  | 6.4576180  | 1.1500790  | H | -4.5911690 | 0.0685890  | 4.8056420  |
| C | -0.0315280 | 0.5898790  | -0.5451200 | C | 1.1822680  | 5.5167180  | 1.9919180  | H | -4.6506570 | -0.0527170 | -4.7867960 |
| N | 1.1765030  | 0.5089240  | -1.3431050 | C | 0.9587580  | 4.2233840  | 1.5421610  | H | -6.4577430 | -2.2273290 | -1.5825370 |
| C | 1.8218040  | 1.5967180  | -1.1393170 | H | -0.3145550 | -1.0319800 | 3.1865400  | H | -6.5906250 | -1.3009950 | -3.8711030 |
| C | 1.0301470  | 2.4829390  | -0.2147840 | H | -2.3608970 | -0.7454410 | 4.5504150  | H | -6.4397690 | 2.2397560  | 1.6227360  |
| N | -0.0369850 | 1.8754990  | 0.1439680  | H | -0.3613900 | 1.0657070  | -3.2176950 | H | -6.5447920 | 1.3119410  | 3.9121460  |
| N | 1.1854630  | -0.4942600 | 1.3030730  | H | -2.4222620 | 0.7714120  | -4.5569830 | H | 1.9401270  | 7.4702140  | 1.5019240  |
| C | 1.8133810  | -1.5953750 | 1.1199360  | H | 3.5004160  | -3.4594250 | -0.4796090 | H | 6.6882320  | 2.2413610  | -3.2772440 |
| C | 1.0365760  | -2.4647480 | 0.1676650  | H | 3.9971770  | -5.6770050 | -1.4338510 | H | 6.3962080  | -2.5184170 | 3.7266610  |
| N | -0.0328790 | -1.8572710 | -0.1845620 | H | -0.1791590 | -6.6596060 | -1.3354840 | H | 2.1631850  | -7.2918740 | -1.8538840 |
| C | 1.3777750  | -3.8032700 | -0.3537030 | H | -0.6739040 | -4.4152480 | -0.3958460 | C | -4.5926160 | -2.0470190 | 0.2321090  |
| C | 3.0899460  | -1.8821510 | 1.8048120  | H | 3.7905880  | 0.1283600  | 1.5697990  | H | -3.5768630 | -2.2861940 | 0.5517240  |
| C | 0.3467890  | -4.7105540 | -0.6124630 | H | 5.9177300  | -0.2742740 | 2.7851240  | H | -5.0682330 | -1.4855380 | 1.0394550  |
| C | 2.9719140  | -5.4112640 | -1.1959930 | H | 4.7488710  | -4.3501860 | 3.4468730  | H | -5.1384300 | -2.9882390 | 0.1204370  |
| C | 1.9427910  | -6.3143580 | -1.4358980 | H | 2.6496200  | -3.9500150 | 2.2157220  | C | -4.5937540 | 2.0647770  | -0.2127490 |
| C | 0.6288390  | -5.9603500 | -1.1441990 | H | 2.6840880  | 0.7031430  | -3.4911360 | H | -3.5816770 | 2.3072640  | -0.5411210 |
| C | 2.6936310  | -4.1623330 | -0.6540860 | H | 4.9326830  | 0.9873800  | -4.5021210 | H | -5.0769080 | 1.5041070  | -1.0161690 |
| C | 4.0153300  | -0.8502000 | 1.9794790  | H | 6.1855040  | 3.2071060  | -1.0496830 | H | -5.1396310 | 3.0049440  | -0.0935160 |
| C | 5.2010680  | -1.0802890 | 2.6622830  | H | 3.9398080  | 2.9505630  | -0.0668290 |   |            |            |            |

SCF Done: E(RCAM-B3LYP) = -2220.96568421 A.U.

Low frequencies --- -1.2848 -0.0010 -0.0008 0.0004 0.3368 0.9555  
 Zero-point correction = 0.745478 (Hartree/Particle)  
 Thermal correction to Energy = 0.787723  
 Thermal correction to Enthalpy = 0.788667  
 Thermal correction to Gibbs Free Energy = 0.667499  
 Sum of electronic and zero-point Energies = -2220.220206  
 Sum of electronic and thermal Energies = -2220.177961  
 Sum of electronic and thermal Enthalpies = -2220.177017  
 Sum of electronic and thermal Free Energies = -2220.298185

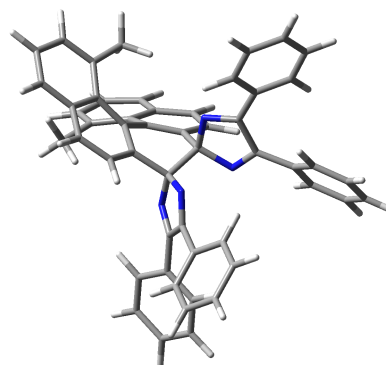

**Table S11.** Standard Orientation of the Optimized Geometry for 8MR of **2**.

|   | X          | Y          | Z          |   | X          | Y          | Z          |   | X          | Y          | Z          |
|---|------------|------------|------------|---|------------|------------|------------|---|------------|------------|------------|
| N | -0.9334570 | 0.5360940  | 2.2617270  | H | 6.0096360  | 1.7362170  | 3.2313370  | H | 3.6095750  | 1.6425300  | 3.8520430  |
| N | 1.4514780  | -0.4832740 | -0.3632270 | C | -4.6862350 | 0.9661030  | -0.2043050 | C | -2.6341710 | -3.1401680 | -2.0109470 |
| N | -1.4514350 | -0.4832530 | 0.3632160  | H | -4.9840520 | 0.7841320  | 0.8234050  | C | -0.6301410 | -0.4501550 | 1.4581130  |
| N | 0.9335020  | 0.5360120  | -2.2617710 | C | -2.8937790 | 3.6961430  | 4.3301470  | C | -3.1442370 | 3.4401900  | 1.5760350  |
| C | 2.6342050  | -3.1401040 | 2.0110370  | H | -2.7880240 | 3.7925790  | 5.4067270  | H | -3.2247040 | 3.3608390  | 0.4981540  |
| C | 0.6301870  | -0.4502130 | -1.4581270 | C | -1.9733110 | 1.2134550  | 1.6654250  | C | -3.9161320 | 1.4484880  | -2.8288740 |
| C | 2.5238250  | 2.4213800  | -2.3049410 | C | 4.6495600  | -4.2401960 | 1.2728140  | H | -3.6096990 | 1.6424010  | -3.8520590 |
| C | 2.3963170  | 2.5700590  | -3.6894970 | H | 5.4765370  | -4.9229240 | 1.4398470  | C | 5.6436460  | 1.2661070  | 1.1643850  |
| H | 1.8939780  | 1.7905860  | -4.2514520 | C | 3.5240870  | 4.6975600  | -3.5991030 | H | 6.6915740  | 1.3105070  | 0.8842500  |
| C | 1.9733360  | 1.2134090  | -1.6654750 | H | 3.9134300  | 5.5788160  | -4.0998550 | C | -2.5467090 | -2.4150460 | -0.7823290 |
| C | -2.3962880 | 2.5701520  | 3.6894150  | C | -3.5241000 | 4.6976290  | 3.5989810  | C | -3.5053980 | -2.7050730 | 0.2493940  |
| H | -1.8939240 | 1.7907050  | 4.2513840  | H | -3.9134520 | 5.5788910  | 4.0997140  | C | -3.4074210 | -2.1844290 | 1.6627020  |
| C | 1.6435630  | -2.9780930 | 3.0107660  | C | -2.9545020 | 1.1551210  | -1.8699100 | H | -3.5483470 | -1.1048850 | 1.7407940  |
| H | 1.7443670  | -3.5433840 | 3.9324560  | H | -1.9038690 | 1.1332390  | -2.1443220 | H | -2.4340260 | -2.4169650 | 2.1035910  |
| C | 3.3327630  | 0.9057540  | 0.5464650  | C | 0.4868510  | -1.3883650 | 1.6375980  | H | -4.1697310 | -2.6646550 | 2.2808260  |
| C | 3.7072960  | -4.0363750 | 2.2369780  | C | 4.5219160  | -3.5883710 | 0.0309630  | C | -0.5751790 | -2.1536810 | -2.8199610 |
| H | 3.7560980  | -4.5573480 | 3.1884710  | H | 5.2414550  | -3.8121630 | -0.7510250 | H | 0.1949890  | -2.0379850 | -3.5743610 |
| C | 1.4773730  | -1.4683800 | 0.6796270  | C | 3.1442170  | 3.4401700  | -1.5761290 | C | -1.6435170 | -2.9782180 | -3.0106740 |
| C | 0.5752270  | -2.1535610 | 2.8200170  | H | 3.2246690  | 3.3608490  | -0.4982450 | H | -1.7443180 | -3.5435560 | -3.9323360 |
| H | -0.1949350 | -2.0378240 | 3.5744170  | C | 2.8937960  | 3.6960420  | -4.3302520 | C | -4.5219330 | -3.5882710 | -0.0308810 |
| C | -2.5238150 | 2.4214320  | 2.3048660  | H | 2.7880570  | 3.7924460  | -5.4068370 | H | -5.2414980 | -3.8119890 | 0.7511040  |
| C | 2.5467360  | -2.4150490 | 0.7823790  | C | -5.2610730 | 1.5038380  | -2.4800090 | C | 3.4073850  | -2.1846570 | -1.6627030 |
| C | -2.3146710 | 0.6009350  | 0.4765070  | H | -6.0097500 | 1.7359900  | -3.2313020 | H | 3.5483400  | -1.1051250 | -1.7409020 |
| C | 3.5053930  | -2.7051730 | -0.2493490 | C | 2.9544430  | 1.1551870  | 1.8698880  | H | 2.4339700  | -2.4172080 | -2.1035400 |
| C | 4.6862210  | 0.9662190  | 0.2043240  | H | 1.9038060  | 1.1332610  | 2.1442770  | H | 4.1696620  | -2.6649640 | -2.2808050 |
| H | 4.9840690  | 0.7842460  | -0.8233770 | C | 3.6427940  | 4.5654710  | -2.2202720 | C | -1.4773330 | -1.4683920 | -0.6796070 |
| C | -3.6428250 | 4.5655000  | 2.2201550  | H | 4.1183900  | 5.3483200  | -1.6370550 | C | -3.7072730 | -4.0364350 | -2.2368500 |
| H | -4.1184450 | 5.3483230  | 1.6369230  | C | -0.4868060 | -1.3884270 | -1.6375780 | H | -3.7560700 | -4.5574640 | -3.1883120 |
| C | 2.3146870  | 0.6009340  | -0.4765320 | C | -5.6436940 | 1.2659310  | -1.1643500 | C | -4.6495590 | -4.2401780 | -1.2726900 |
| C | -3.3327810 | 0.9056930  | -0.5464740 | H | -6.6916180 | 1.3102890  | -0.8841930 | H | -5.4765480 | -4.9229000 | -1.4396970 |
| C | 5.2609850  | 1.5040180  | 2.4800310  | C | 3.9160390  | 1.4486140  | 2.8288680  |   |            |            |            |

SCF Done: E(RCAM-B3LYP) = -2221.03248782 A.U.

Low frequencies --- -2.0604 -1.8044 0.0002 0.0003 0.0006 0.8605  
 Zero-point correction = 0.747754 (Hartree/Particle)  
 Thermal correction to Energy = 0.789870  
 Thermal correction to Enthalpy = 0.790814  
 Thermal correction to Gibbs Free Energy = 0.670698  
 Sum of electronic and zero-point Energies = -2220.284734  
 Sum of electronic and thermal Energies = -2220.242618  
 Sum of electronic and thermal Enthalpies = -2220.241674  
 Sum of electronic and thermal Free Energies = -2220.361790

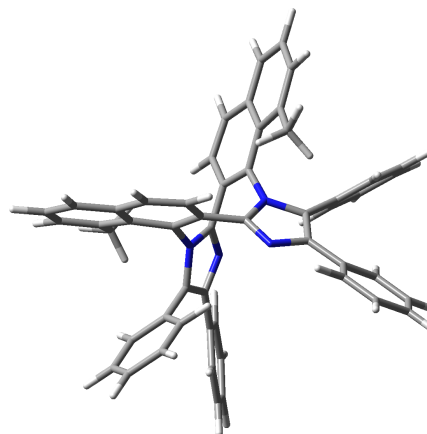

**Table S12.** Standard Orientation of the Optimized Geometry for BR of 2.

|   | X          | Y          | Z          |   | X          | Y          | Z          |   | X          | Y          | Z          |
|---|------------|------------|------------|---|------------|------------|------------|---|------------|------------|------------|
| C | 0.0787870  | 1.0797730  | 2.9205720  | C | -5.1466840 | -4.1579370 | 3.8495180  | H | 5.6179890  | -1.7340270 | -0.4706610 |
| C | 1.0690960  | 1.8996120  | 3.3448440  | C | -5.7771160 | -3.4097150 | 2.8616070  | H | 7.2757880  | -2.0166780 | 1.3275660  |
| C | 1.7088850  | 2.8022080  | 2.4549220  | C | -5.0531680 | -2.4948040 | 2.1083170  | H | 4.3966740  | -0.6494500 | 4.2019070  |
| C | 1.3159950  | 2.8603550  | 1.0815270  | C | 3.5138110  | -2.6427260 | -2.1130050 | H | 2.7354820  | -0.3500860 | 2.3846270  |
| C | 0.2493630  | 1.9901280  | 0.6542550  | C | 4.0503530  | -1.0517210 | 0.8426770  | C | 2.7343170  | 3.6287070  | 2.9623080  |
| C | -0.3592990 | 1.1138790  | 1.5650880  | C | 3.6037310  | -2.7276830 | -3.5085980 | C | -2.7309080 | 3.4293500  | -3.1495340 |
| C | -0.2125610 | 1.9487410  | -0.7706590 | C | 4.1770930  | -3.8361150 | -4.1115330 | C | -1.9598410 | 3.8011440  | -0.4600490 |
| C | 0.3748760  | 1.0055080  | -1.6265760 | C | 4.6559160  | -4.8866830 | -3.3330120 | C | -2.9665380 | 4.5374950  | -1.0495300 |
| C | -0.0859500 | 0.8775060  | -2.9680840 | C | 4.5533590  | -4.8220830 | -1.9478810 | C | -3.3642460 | 4.3665870  | -2.3848770 |
| C | -1.0787120 | 1.6694880  | -3.4340380 | C | 3.9884100  | -3.7087680 | -1.3397280 | C | 2.0241970  | 3.7917830  | 0.2355120  |
| C | -1.6936750 | 2.6420850  | -2.6031310 | C | 5.3406550  | -1.5137380 | 0.5536600  | C | 3.0167400  | 4.5729710  | 0.7894210  |
| C | -1.2741340 | 2.8012690  | -1.2451470 | C | 6.2767840  | -1.6661370 | 1.5675240  | C | 3.3825710  | 4.5070850  | 2.1430150  |
| C | -1.4487270 | 0.2097820  | 1.2467700  | C | 5.9395520  | -1.3638990 | 2.8823940  | H | 2.9928370  | 3.5461970  | 4.0139020  |
| C | 1.4579100  | 0.1132230  | -1.2595060 | C | 4.6628030  | -0.8932020 | 3.1779440  | H | -3.0089060 | 3.2697710  | -4.1873390 |
| N | 1.8887500  | -0.8465000 | -2.1424740 | C | 3.7276260  | -0.7294370 | 2.1682630  | H | -3.4752770 | 5.2851680  | -0.4489180 |
| C | 2.8604490  | -1.4757910 | -1.5149490 | H | -0.4150280 | 0.3902920  | 3.5925310  | H | -4.1631490 | 4.9764360  | -2.7950740 |
| C | 3.0506090  | -0.8272410 | -0.2014490 | H | 1.3921500  | 1.8834780  | 4.3819860  | H | 3.5423150  | 5.2698870  | 0.1438860  |
| N | 2.1478540  | 0.1309230  | -0.0854990 | H | 0.3822940  | 0.1286100  | -3.5926050 | H | 4.1728330  | 5.1470360  | 2.5227940  |
| N | -1.8977600 | -0.6850400 | 2.1869910  | H | -1.4281220 | 1.5710910  | -4.4577190 | H | 6.6716150  | -1.4886080 | 3.6744950  |
| C | -2.8946510 | -1.3196060 | 1.6055640  | H | -4.0908800 | -3.2591530 | -0.3028390 | H | 5.1022120  | -5.7560210 | -3.8060840 |
| C | -3.0316430 | -0.7927390 | 0.2320830  | H | -5.5171970 | -3.8643550 | -2.2167210 | H | -5.7136700 | -4.8762270 | 4.4337330  |
| N | -2.1311850 | 0.1607140  | 0.0698690  | H | -5.3326840 | 0.1816660  | -3.6379480 | H | -6.1567450 | -2.1465100 | -3.8872950 |
| C | -3.9160900 | -1.1854500 | -0.8648870 | H | -3.8819600 | 0.7815990  | -1.7197440 | C | -1.6723710 | 4.1361580  | 0.9854150  |
| C | -3.6841550 | -2.3134930 | 2.3373160  | H | -2.0078130 | -2.8979550 | 3.5357810  | H | -1.8154450 | 3.2833860  | 1.6508590  |
| C | -4.2594640 | -0.2284680 | -1.8302480 | H | -3.2914370 | -4.5551020 | 4.8658190  | H | -0.6538050 | 4.4973180  | 1.1377620  |
| C | -5.1752480 | -2.8403000 | -2.1036480 | H | -6.8400100 | -3.5334920 | 2.6789880  | H | -2.3523950 | 4.9268300  | 1.3116480  |
| C | -5.5282080 | -1.8782190 | -3.0435960 | H | -5.5560770 | -1.9034480 | 1.3518430  | C | 1.7792240  | 4.0014540  | -1.2409290 |
| C | -5.0657360 | -0.5721030 | -2.9036120 | H | 3.2140310  | -1.9092700 | -4.1031320 | H | 1.9417370  | 3.0932600  | -1.8234390 |
| C | -4.3768640 | -2.4987290 | -1.0202480 | H | 4.2489760  | -3.8842570 | -5.1937050 | H | 0.7665770  | 4.3468060  | -1.4564430 |
| C | -3.0635720 | -3.0581470 | 3.3489650  | H | 4.9091380  | -5.6451320 | -1.3359780 | H | 2.4706970  | 4.7609030  | -1.6140410 |
| C | -3.7873850 | -3.9774570 | 4.0919030  | H | 3.8966580  | -3.6740540 | -0.2602390 |   |            |            |            |

SCF Done: E(UCAM-B3LYP) = -2220.95482360 A.U.  
 S\*\*2 before annihilation 1.1164, after 0.9782

Low frequencies --- -1.2218 -0.9851 -0.0006 0.0002 0.0005 0.5366  
 Zero-point correction = 0.742335 (Hartree/Particle)  
 Thermal correction to Energy = 0.785619  
 Thermal correction to Enthalpy = 0.786563  
 Thermal correction to Gibbs Free Energy = 0.660491  
 Sum of electronic and zero-point Energies = -2220.212489  
 Sum of electronic and thermal Energies = -2220.169205  
 Sum of electronic and thermal Enthalpies = -2220.168261  
 Sum of electronic and thermal Free Energies = -2220.294332

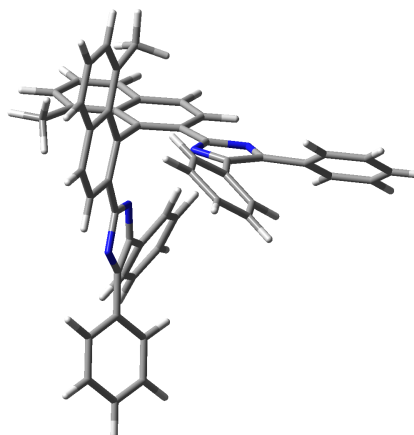

**Table S13.** Standard Orientation of the Optimized Geometry for TS1 of 2.

|   | X          | Y          | Z          |   | X          | Y          | Z          |   | X          | Y          | Z          |
|---|------------|------------|------------|---|------------|------------|------------|---|------------|------------|------------|
| C | -1.4373540 | 1.0264550  | 2.6816860  | C | 5.7477220  | -0.5788360 | 3.0245860  | H | 2.5073530  | 3.7110280  | -2.6131300 |
| C | -2.5204660 | 1.7571230  | 3.0710180  | C | 5.1272170  | -1.8230310 | 3.0262930  | H | 2.9642790  | 6.1196990  | -2.3398240 |
| C | -3.6189730 | 1.9421970  | 2.2002730  | C | 3.8455200  | -1.9660090 | 2.5117210  | H | 0.5234560  | 6.1842130  | 1.1898560  |
| C | -3.6208880 | 1.3262170  | 0.9089140  | C | 3.1715780  | 0.9103830  | -1.8025420 | H | 0.0533010  | 3.7613110  | 0.8978710  |
| C | -2.5713710 | 0.3885330  | 0.6211290  | C | 1.2662570  | 3.5752650  | -0.8576240 | C | -4.6947120 | 2.7679500  | 2.6103560  |
| C | -1.4641850 | 0.3268710  | 1.4563600  | C | 3.6068520  | -0.1532720 | -2.6063140 | C | -4.6311790 | -2.9192370 | -2.5681880 |
| C | -2.5635380 | -0.4866840 | -0.5853110 | C | 4.9493550  | -0.3008610 | -2.9144710 | C | -4.6129640 | -1.8743110 | 0.0545550  |
| C | -1.4608140 | -0.3981970 | -1.4236310 | C | 5.8854180  | 0.6025160  | -2.4162230 | C | -5.6013500 | -2.7204310 | -0.3930960 |
| C | -1.4201900 | -1.0961750 | -2.6484110 | C | 5.4678760  | 1.6499160  | -1.6044460 | C | -5.6467160 | -3.2190270 | -1.7095870 |
| C | -2.4856170 | -1.8528810 | -3.0350620 | C | 4.1214960  | 1.8062240  | -1.2990490 | C | -4.6525890 | 1.7288160  | -0.0146960 |
| C | -3.5763330 | -2.0654480 | -2.1611700 | C | 2.0826900  | 4.2482920  | -1.7717090 | C | -5.6619560 | 2.5482690  | 0.4357650  |
| C | -3.5913090 | -1.4486940 | -0.8700780 | C | 2.3362450  | 5.6053400  | -1.6190800 | C | -5.7189390 | 3.0423520  | 1.7534950  |
| C | -0.2292680 | -0.3905440 | 1.0638440  | C | 1.7817880  | 6.3034220  | -0.5516990 | H | -4.6721300 | 3.1876590  | 3.6119920  |
| C | -0.2483480 | 0.3590490  | -1.0373050 | C | 0.9620970  | 5.6417600  | 0.3581300  | H | -4.5990650 | -3.3398000 | -3.5691740 |
| N | 0.9774660  | -0.0592170 | -1.5055670 | C | 0.6988680  | 4.2885530  | 0.2040020  | H | -6.3621370 | -3.0427990 | 0.3122650  |
| C | 1.7452420  | 1.0003820  | -1.4741910 | H | -0.5569730 | 0.9468550  | 3.3076500  | H | -6.4581620 | -3.8736000 | -2.0121750 |
| C | 0.9201550  | 2.1557480  | -1.0193650 | H | -2.5374480 | 2.2459720  | 4.0408760  | H | -6.4305800 | 2.8537480  | -0.2685320 |
| N | -0.2794350 | 1.7285010  | -0.7564510 | H | -0.5437420 | -0.9966890 | -3.2770250 | H | -6.5467400 | 3.6750750  | 2.0582540  |
| N | 0.9780370  | 0.0732170  | 1.5438230  | H | -2.4920010 | -2.3444140 | -4.0035810 | H | 1.9842160  | 7.3633190  | -0.4314690 |
| C | 1.7875200  | -0.9539680 | 1.4980660  | H | 3.4177390  | -2.8550820 | -0.1236530 | H | 6.9374850  | 0.4859210  | -2.6574940 |
| C | 1.0287930  | -2.1201030 | 0.9616990  | H | 4.1072690  | -5.1306990 | -0.7821710 | H | 6.7518920  | -0.4708580 | 3.4230580  |
| N | -0.2001540 | -1.7518110 | 0.7512550  | H | 0.3257030  | -6.6639090 | 0.5470780  | H | 2.5704030  | -7.0461070 | -0.4378120 |
| C | 1.4897610  | -3.4712690 | 0.6122310  | H | -0.3669520 | -4.3690800 | 1.1915320  | C | -4.6288140 | -1.5397750 | 1.5288370  |
| C | 3.1647660  | -0.8603090 | 1.9885310  | H | 3.2487440  | 1.2492510  | 1.6305710  | H | -3.6254410 | -1.5266340 | 1.9572280  |
| C | 0.6178880  | -4.5523680 | 0.7764450  | H | 5.5510340  | 1.5046160  | 2.5211540  | H | -5.0870200 | -0.5707310 | 1.7381170  |
| C | 3.1312000  | -4.9723330 | -0.3340870 | H | 5.6403550  | -2.6876550 | 3.4353980  | H | -5.2087860 | -2.2991930 | 2.0602050  |
| C | 2.2667250  | -6.0451540 | -0.1467580 | H | 3.3648490  | -2.9365630 | 2.5336550  | C | -4.6569690 | 1.4007010  | -1.4902990 |
| C | 1.0077680  | -5.8310620 | 0.4070100  | H | 2.8695150  | -0.8557110 | -2.9776830 | H | -5.2573510 | 2.1459930  | -2.0188670 |
| C | 2.7483010  | -3.6917750 | 0.0441550  | H | 5.2696880  | -1.1235700 | -3.5462230 | H | -3.6525390 | 1.4196110  | -1.9159200 |
| C | 3.7917490  | 0.3926140  | 2.0116650  | H | 6.1933430  | 2.3492150  | -1.2007250 | H | -5.0865860 | 0.4198870  | -1.7050790 |
| C | 5.0741030  | 0.5294150  | 2.5180960  | H | 3.8109760  | 2.6192260  | -0.6544700 |   |            |            |            |

SCF Done: E(UCAM-B3LYP) = -2220.92531362 A.U.  
 S\*\*2 before annihilation 0.4445, after 0.0819

Low frequencies --- -622.0767 -0.3206 -0.0007 -0.0004 0.0003 1.6047  
 \*\*\*\*\* 1 imaginary frequencies (negative Signs) \*\*\*\*\*

Zero-point correction = 0.742139 (Hartree/Particle)  
 Thermal correction to Energy = 0.784569  
 Thermal correction to Enthalpy = 0.785513  
 Thermal correction to Gibbs Free Energy = 0.664179  
 Sum of electronic and zero-point Energies = -2220.183175  
 Sum of electronic and thermal Energies = -2220.140745  
 Sum of electronic and thermal Enthalpies = -2220.139801  
 Sum of electronic and thermal Free Energies = -2220.261135

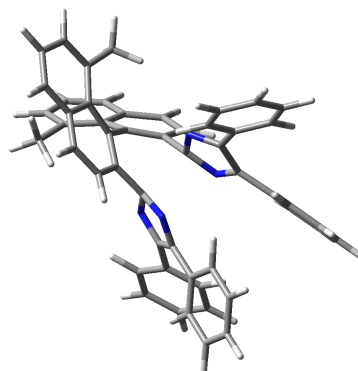

**Table S14.** Standard Orientation of the Optimized Geometry for TS2 of 2.

|   | X          | Y          | Z          |   | X          | Y          | Z          |   | X          | Y          | Z          |
|---|------------|------------|------------|---|------------|------------|------------|---|------------|------------|------------|
| C | -0.2312540 | 2.8243920  | 2.0104750  | C | -6.6011230 | -1.4022200 | 4.0664040  | H | 5.7941130  | -0.5821850 | 1.0301450  |
| C | 0.7308850  | 3.7487470  | 1.7623070  | C | -5.9900690 | -2.3488080 | 3.2519610  | H | 7.0152080  | 0.1860660  | 3.0253310  |
| C | 1.3575510  | 3.8407110  | 0.4878060  | C | -4.9050830 | -1.9989480 | 2.4587790  | H | 3.3105480  | 1.3629430  | 4.8447530  |
| C | 0.9909650  | 2.9615780  | -0.5832450 | C | 4.4229360  | -2.5270850 | -0.4675360 | H | 2.0878310  | 0.6081060  | 2.8224800  |
| C | -0.0072730 | 1.9682360  | -0.2762040 | C | 3.8508020  | -0.0681070 | 1.8079280  | C | 2.3339130  | 4.8440190  | 0.3004500  |
| C | -0.5714750 | 1.9158620  | 0.9865660  | C | 4.8725230  | -2.9538740 | -1.7225710 | C | -3.0423050 | 0.4259570  | -4.0019810 |
| C | -0.5179330 | 0.9209770  | -1.2292440 | C | 5.8378990  | -3.9437480 | -1.8254300 | C | -2.6071380 | 2.2717350  | -1.9185330 |
| C | 0.4213670  | -0.1282780 | -1.6182420 | C | 6.3583260  | -4.5345010 | -0.6773210 | C | -3.6884140 | 2.3704160  | -2.7883650 |
| C | 0.1165290  | -0.9667150 | -2.7320420 | C | 5.9048370  | -4.1306810 | 0.5733640  | C | -3.9255210 | 1.4618650  | -3.8161800 |
| C | -1.0109690 | -0.7799800 | -3.4467160 | C | 4.9454360  | -3.1320220 | 0.6803450  | C | 1.6090920  | 3.1883410  | -1.8626030 |
| C | -1.9298300 | 0.2843740  | -3.1617900 | C | 5.2447330  | -0.1732830 | 1.8701890  | C | 2.5501710  | 4.1892520  | -1.9828120 |
| C | -1.6895680 | 1.1887740  | -2.0876110 | C | 5.9330940  | 0.2662120  | 2.9935050  | C | 2.9340040  | 5.0134250  | -0.9140440 |
| C | -1.5262860 | 0.8593670  | 1.1912120  | C | 5.2411700  | 0.8118540  | 4.0688640  | H | 2.5888560  | 5.4796640  | 1.1433180  |
| C | 1.5756540  | -0.4423940 | -0.8837760 | C | 3.8551150  | 0.9314220  | 4.0106540  | H | -3.1852530 | -0.2935730 | -4.8022840 |
| N | 2.4253520  | -1.4544020 | -1.3069710 | C | 3.1648780  | 0.5034840  | 2.8874760  | H | -4.3789110 | 3.1963330  | -2.6506920 |
| C | 3.3634950  | -1.5120810 | -0.3988880 | H | -0.7339120 | 2.7462490  | 2.9681550  | H | -4.7893650 | 1.5809850  | -4.4622650 |
| C | 3.0886020  | -0.4700380 | 0.6211510  | H | 1.0385890  | 4.4498840  | 2.5326540  | H | 3.0078890  | 4.3492840  | -2.9546310 |
| N | 1.9780970  | 0.1420720  | 0.2930120  | H | 0.8117230  | -1.7627230 | -2.9627160 | H | 3.6835520  | 5.7838510  | -1.0643440 |
| N | -2.5270600 | 0.8172050  | 2.0577150  | H | -1.2462190 | -1.4385130 | -4.2772180 | H | 5.7807180  | 1.1492010  | 4.9485760  |
| C | -3.2608650 | -0.2617290 | 1.6588420  | H | -1.0169340 | -2.8207050 | -0.2867900 | H | 7.1122540  | -5.3114700 | -0.7583070 |
| C | -2.6551020 | -0.8524240 | 0.5134380  | H | -1.5778730 | -4.7795120 | -1.6907780 | H | -7.4509150 | -1.6782340 | 4.6833610  |
| N | -1.5154090 | -0.1731670 | 0.2954720  | H | -5.6504140 | -3.4436980 | -1.9088950 | H | -3.9006800 | -5.0997110 | -2.5058120 |
| C | -3.0125610 | -2.0321500 | -0.2904230 | H | -5.0807000 | -1.4904710 | -0.5079050 | C | -2.5420440 | 3.3481530  | -0.8603920 |
| C | -4.4103380 | -0.6895210 | 2.4658730  | H | -4.6169390 | 1.2559050  | 3.3356040  | H | -2.7594690 | 2.9551140  | 0.1355240  |
| C | -4.3159840 | -2.2176280 | -0.7612630 | H | -6.5717570 | 0.6439500  | 4.7326270  | H | -1.5702520 | 3.8408440  | -0.8122840 |
| C | -2.3501490 | -4.0611590 | -1.4323450 | H | -6.3548760 | -3.3714650 | 3.2371830  | H | -3.2917820 | 4.1113140  | -1.0819550 |
| C | -3.6520690 | -4.2414360 | -1.8888850 | H | -4.4295700 | -2.7530400 | 1.8439180  | C | 1.3040800  | 2.4155870  | -3.1235110 |
| C | -4.6333160 | -3.3153530 | -1.5508630 | H | 4.4494340  | -2.4954660 | -2.6093660 | H | 1.7746100  | 1.4295220  | -3.1293770 |
| C | -2.0320810 | -2.9655310 | -0.6412340 | H | 6.1848900  | -4.2587030 | -2.8046830 | H | 0.2349370  | 2.2702950  | -3.2847030 |
| C | -5.0195710 | 0.2500530  | 3.3091050  | H | 6.2952770  | -4.5980750 | 1.4719180  | H | 1.6903490  | 2.9635840  | -3.9866060 |
| C | -6.1078730 | -0.1008990 | 4.0928190  | H | 4.5870120  | -2.8326880 | 1.6587020  |   |            |            |            |

SCF Done: E(UCAM-B3LYP) = -2220.92420670 A.U.  
 S\*\*2 before annihilation 0.5394, after 0.2018

Low frequencies ----1077.3289 -1.4287 -0.0005 0.0005 0.0008 1.4563  
 \*\*\*\*\* 1 imaginary frequencies (negative Signs) \*\*\*\*\*

Zero-point correction = 0.741398 (Hartree/Particle)  
 Thermal correction to Energy = 0.784016  
 Thermal correction to Enthalpy = 0.784960  
 Thermal correction to Gibbs Free Energy = 0.662053  
 Sum of electronic and zero-point Energies = -2220.182809  
 Sum of electronic and thermal Energies = -2220.140191  
 Sum of electronic and thermal Enthalpies = -2220.139247  
 Sum of electronic and thermal Free Energies = -2220.262154

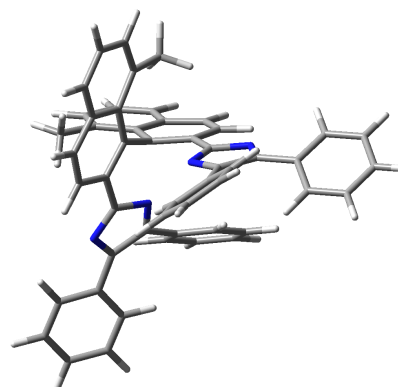

**Table S15.** Standard Orientation of the Optimized Geometry for 5MR of **3**.

|   | X          | Y          | Z          |   | X           | Y          | Z          |   | X           | Y           | Z          |
|---|------------|------------|------------|---|-------------|------------|------------|---|-------------|-------------|------------|
| C | -0.2056480 | -1.8695780 | -5.3283550 | C | -2.6076940  | -1.1094860 | -1.2950560 | H | -9.7147010  | -1.7779980  | -0.7684060 |
| C | -0.4491330 | -1.1555470 | -6.4687590 | H | -0.6731640  | -2.8306050 | -5.1451170 | C | -9.4903520  | -5.6383570  | -0.7738680 |
| C | 0.1604510  | 0.1073550  | -6.6983200 | H | -1.1236690  | -1.5461480 | -7.2251570 | H | -7.3621990  | -5.3586910  | -0.9251570 |
| C | 1.0517550  | 0.6604480  | -5.7294380 | H | 2.3092740   | 3.4789420  | -1.9866880 | C | -10.7319150 | -5.0163600  | -0.6876700 |
| C | 1.2846930  | -0.1019550 | -4.5615150 | H | 4.5963360   | 3.4164890  | -2.8602380 | H | -11.7781670 | -3.1378030  | -0.6186790 |
| C | 0.6746180  | -1.3243930 | -4.3758740 | H | 1.5657520   | -0.3081990 | 1.0644410  | H | -9.4234290  | -6.7218190  | -0.7755360 |
| C | 2.2129720  | 0.2295690  | -3.3679100 | H | 2.9891000   | 0.9523900  | 2.6466820  | H | -11.6361590 | -5.6133240  | -0.6219730 |
| C | 1.7764760  | 1.4932400  | -2.6196150 | H | 6.3528020   | 0.4065960  | 0.0439640  | C | -5.0200670  | 7.8018650   | 4.0956950  |
| C | 2.6831770  | 2.6057260  | -2.5062750 | H | 4.9344000   | -0.8656930 | -1.5244570 | C | -4.8692070  | 9.1816300   | 3.9053960  |
| C | 3.9390860  | 2.5607740  | -2.9855990 | H | -0.3379000  | -4.3998900 | -0.7232370 | C | -5.8368000  | 7.3425990   | 5.1372240  |
| C | 4.4778730  | 1.3908860  | -3.6559030 | H | -0.5194580  | -6.0288410 | 1.1346770  | C | -5.5214950  | 10.0781320  | 4.7391040  |
| C | 3.6715490  | 0.2610280  | -3.8413600 | H | 3.1625200   | -4.5568870 | 2.7609830  | H | -4.2369690  | 9.5383970   | 3.0994130  |
| C | 1.0919230  | -1.8386410 | -3.0845810 | H | 3.3407210   | -2.9479460 | 0.9168860  | C | -6.4859100  | 8.2450530   | 5.9669780  |
| C | 0.5414080  | 1.5838220  | -2.0418570 | H | -0.9966130  | 5.0705830  | -1.0028780 | H | -5.9542240  | 6.2745310   | 5.2856860  |
| N | 0.1279620  | 2.7101340  | -1.3293110 | H | -2.1639190  | 6.6865630  | 0.4729030  | C | -6.3308310  | 9.6137630   | 5.7711430  |
| C | -1.0638560 | 2.4157540  | -0.8999060 | H | -3.8912440  | 3.4237190  | 2.6544890  | H | -5.3976230  | 11.1451770  | 4.5827870  |
| C | -1.4252870 | 1.0574970  | -1.3928980 | H | -2.7475920  | 1.8228440  | 1.1744730  | H | -7.1162880  | 7.8783460   | 6.7710230  |
| N | -0.4181580 | 0.5840610  | -2.0672450 | H | -3.9943180  | 1.9885100  | -1.1572880 | H | -6.8399950  | 10.3176190  | 6.4220220  |
| N | 0.8070980  | -2.8304010 | -2.2859600 | H | -6.0452180  | 0.6370740  | -1.0163200 | C | 5.5914630   | 1.5003490   | 2.3611310  |
| C | 1.5483100  | -2.5859070 | -1.1437690 | H | -3.7042010  | -2.9499970 | -1.2341770 | C | 6.2872130   | 2.1197190   | 3.1312740  |
| C | 2.2797880  | -1.4118180 | -1.2732160 | H | -1.6417100  | -1.5920720 | -1.3999840 | C | 1.2061100   | -6.3377240  | 3.1570360  |
| N | 1.9853200  | -0.9692500 | -2.5449320 | C | -0.1031050  | 0.8399630  | -7.8822950 | C | 1.1228150   | -7.1326550  | 4.0641710  |
| C | 3.1477310  | -0.6680490 | -0.3420340 | C | 5.8046610   | 1.3704780  | -4.1014200 | C | 7.1073830   | 2.8524450   | 4.0434650  |
| C | 1.4913400  | -3.5360750 | -0.0228020 | C | 4.2050000   | -0.8623460 | -4.4650520 | C | 6.5538340   | 3.4143930   | 5.2012860  |
| C | 4.5026960  | -0.4588040 | -0.6164700 | C | 5.5244620   | -0.8754200 | -4.8981390 | C | 8.4756290   | 3.0189150   | 3.7927670  |
| C | 3.4121850  | 0.5537970  | 1.7311370  | C | 6.3289700   | 0.2467120  | -4.7170930 | C | 7.3527280   | 4.1253260   | 6.0848850  |
| C | 4.7686420  | 0.7686880  | 1.4519100  | C | 1.6370820   | 1.9273110  | -5.9868940 | H | 5.4946140   | 3.2863380   | 5.3968100  |
| C | 5.3023480  | 0.2515120  | 0.2652060  | C | 1.3571650   | 2.6058750  | -7.1424830 | C | 9.2684240   | 3.7310150   | 4.6809270  |
| C | 2.6165470  | -0.1516580 | 0.8446600  | C | 0.4788650   | 2.0585990  | -8.1036740 | H | 8.9058800   | 2.5836200   | 2.8971650  |
| C | 0.4173260  | -4.4310930 | 0.0534800  | H | -0.7823580  | 0.4126050  | -8.6146380 | C | 8.7107030   | 4.2860010   | 5.8283680  |
| C | 0.3211630  | -5.3445380 | 1.0877990  | H | 6.4222890   | 2.2513730  | -3.9506570 | H | 6.9130840   | 4.5563450   | 6.9789320  |
| C | 1.3032260  | -5.3989340 | 2.0860180  | H | 3.5827460   | -1.7395260 | -4.6091290 | H | 10.3276100  | 3.8532980   | 4.4768690  |
| C | 2.3865900  | -4.5155440 | 2.0039380  | H | 5.9232750   | -1.7622830 | -5.3798070 | H | 9.3334170   | 4.8425840   | 6.5217470  |
| C | 2.4801830  | -3.6043410 | 0.9651570  | H | 7.3599440   | 0.2417700  | -5.0559120 | C | 1.0250490   | -8.0716740  | 5.1362690  |
| C | -1.8099380 | 3.3407360  | -0.0344450 | H | 2.3082350   | 2.3631580  | -5.2565680 | C | 2.0143600   | -8.1257500  | 6.1270980  |
| C | -2.6696900 | 0.2898560  | -1.2547180 | H | 1.8128610   | 3.5746020  | -7.3224670 | C | -0.0616310  | -8.9529070  | 5.2133210  |
| C | -1.6441200 | 4.7195870  | -0.2073450 | H | 0.2666560   | 2.6086550  | -9.0149620 | C | 1.9162090   | -9.0389600  | 7.1667900  |
| C | -2.2904550 | 5.6195140  | 0.6200760  | C | -6.2061080  | -2.0305850 | -1.0159580 | H | 2.8566620   | -7.4446270  | 6.0697640  |
| C | -3.1147950 | 5.1648020  | 1.6594580  | C | -7.2137590  | -2.6943070 | -0.9428930 | C | -0.1533400  | -9.8635050  | 6.2558860  |
| C | -3.2674030 | 3.7848020  | 1.8442560  | C | -3.7834920  | 6.0906720  | 2.5149840  | H | -0.8288650  | -8.9130840  | 4.4475220  |
| C | -2.6256080 | 2.8870240  | 1.0071780  | C | -4.3500410  | 6.8753720  | 3.2391170  | C | 0.8336560   | -9.9102120  | 7.2353460  |
| C | -3.9212850 | 0.9072040  | -1.1571830 | C | -8.4040070  | -3.4795990 | -0.8566130 | H | 2.6893530   | -9.0709150  | 7.9283030  |
| C | -5.0786030 | 0.1500000  | -1.0835970 | C | -9.6581490  | -2.8612500 | -0.7694720 | H | -1.0003280  | -10.5409590 | 6.3043290  |
| C | -5.0154040 | -1.2489850 | -1.1019010 | C | -8.3326450  | -4.8788060 | -0.8579240 | H | 0.7593810   | -10.6237970 | 8.0500420  |
| C | -3.7611730 | -1.8672010 | -1.2120520 | C | -10.8115850 | -3.6273200 | -0.6857920 |   |             |             |            |

SCF Done: E(RCAM-B3LYP) = -3370.54341963 A.U.

Low frequencies --- -0.8933 -0.0028 -0.0020 -0.0013 0.1768 0.6122  
 Zero-point correction = 1.058213 (Hartree/Particle)  
 Thermal correction to Energy = 1.125163  
 Thermal correction to Enthalpy = 1.126107  
 Thermal correction to Gibbs Free Energy = 0.936201  
 Sum of electronic and zero-point Energies = -3369.485207  
 Sum of electronic and thermal Energies = -3369.418257  
 Sum of electronic and thermal Enthalpies = -3369.417313  
 Sum of electronic and thermal Free Energies = -3369.607218

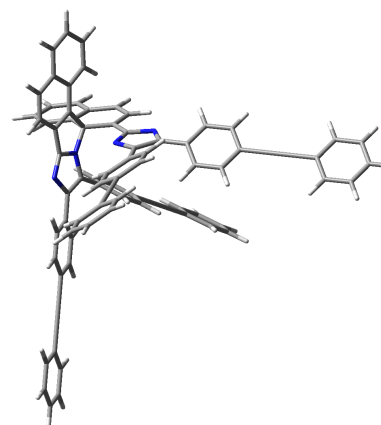



Table S16. Standard Orientation of the Optimized Geometry for 6MR of 3.

|   | X          | Y          | Z          |   | X           | Y          | Z          |   | X           | Y          | Z          |
|---|------------|------------|------------|---|-------------|------------|------------|---|-------------|------------|------------|
| C | -0.1326330 | -3.5680870 | 2.8798600  | C | -4.5246590  | -1.2188930 | 0.7785280  | H | -10.8160100 | 1.4667510  | -1.3230850 |
| C | -0.5790470 | -4.6200060 | 3.6289620  | H | 0.1603070   | -2.6391640 | 3.3535670  | C | -12.4805610 | 0.5854890  | 2.0541170  |
| C | -1.0775570 | -5.7846550 | 3.0019400  | H | -0.6131510  | -4.5497440 | 4.7124010  | H | -10.5593990 | -0.2032560 | 2.6171960  |
| C | -1.0314980 | -5.8893230 | 1.5823360  | H | -0.5384900  | -2.8102880 | -3.3091810 | C | -13.2245130 | 1.2065990  | 1.0558690  |
| C | -0.4067740 | -4.8427110 | 0.8251640  | H | 0.0111720   | -4.8746380 | -4.5458360 | H | -13.2014520 | 2.0076500  | -0.9406510 |
| C | -0.0694600 | -3.6708110 | 1.4766540  | H | 3.5381760   | 0.8726080  | 0.0882590  | H | -12.9445770 | 0.3362070  | 3.0032760  |
| C | -0.1993370 | -4.9001850 | -0.6480930 | H | 5.9085210   | 1.2109080  | -0.4869600 | H | -14.2704520 | 1.4431960  | 1.2242550  |
| C | -0.4060870 | -3.7403540 | -1.3712980 | H | 6.6004410   | -3.0080650 | -0.1519400 | C | -1.3416630  | 6.9721180  | -5.0112190 |
| C | -0.3432780 | -3.7336700 | -2.7776490 | H | 4.2057650   | -3.3475020 | 0.4051850  | C | -0.5493370  | 7.2017900  | -6.1434830 |
| C | -0.0222300 | -4.8728260 | -3.4601600 | H | -0.3513490  | 1.4121570  | 1.4947830  | C | -2.1118060  | 8.0214750  | -4.4932620 |
| C | 0.3483800  | -6.0442230 | -2.7613700 | H | -0.0423270  | 3.5521490  | 2.7120940  | C | -0.5302590  | 8.4533810  | -6.7413250 |
| C | 0.2989410  | -6.0552160 | -1.3380790 | H | 3.8072720   | 2.2189640  | 4.0511000  | H | 0.0475230   | 6.3899980  | -6.5451460 |
| C | 0.3140270  | -2.4594070 | 0.6351920  | H | 3.5085190   | 0.1057960  | 2.8195760  | C | -2.0876480  | 9.2704040  | -5.0964520 |
| C | -0.6397830 | -2.4428760 | -0.6085780 | H | -0.0569970  | 0.1981810  | -3.5671290 | H | -2.7255520  | 7.8446550  | -3.6165320 |
| N | -0.3514180 | -1.2650730 | -1.4037950 | H | -0.0253180  | 2.4285150  | -4.6511780 | C | -1.2981010  | 9.4902800  | -6.2207400 |
| C | -1.4194920 | -0.5573110 | -1.4086400 | H | -2.7753720  | 3.8862290  | -1.7014810 | H | 0.0872320   | 8.6207130  | -7.6182510 |
| C | -2.4977710 | -1.2738600 | -0.6398960 | H | -2.8308510  | 1.6617840  | -0.6470880 | H | -2.6881480  | 10.0766940 | -4.6870530 |
| N | -2.0241680 | -2.3601750 | -0.1581850 | H | -4.2043790  | -0.0246060 | -2.3836340 | H | -1.2811320  | 10.4686370 | -6.6906470 |
| N | 0.1693210  | -1.2184630 | 1.3723390  | H | -6.5820660  | 0.4978010  | -2.0060260 | C | 7.7940750   | -0.6732600 | -0.6744280 |
| C | 1.3209040  | -0.6575960 | 1.3701530  | H | -6.3296560  | -1.1691770 | 1.9372200  | C | 8.9587430   | -0.5050320 | -0.9502910 |
| C | 2.2948980  | -1.5137980 | 0.6057830  | H | -3.9389370  | -1.7165910 | 1.5432830  | C | 2.0854210   | 4.2588640  | 4.1676630  |
| N | 1.6963580  | -2.5626700 | 0.1833780  | C | -1.6737050  | -6.8234280 | 3.7632690  | C | 2.2371670   | 5.2981300  | 4.7656990  |
| C | 3.7186090  | -1.2634900 | 0.3114080  | C | 0.8205390   | -7.1881290 | -3.4560200 | C | 10.3354130  | -0.3061110 | -1.2767520 |
| C | 1.5580310  | 0.6231420  | 2.0633620  | C | 0.8308370   | -7.1929840 | -0.6703080 | C | 10.8264970  | 0.9815810  | -1.5284600 |
| C | 4.5930850  | -2.3510440 | 0.2245240  | C | 1.3109390   | -8.2682440 | -1.3675650 | C | 11.2123540  | -1.3962290 | -1.3495040 |
| C | 5.5383240  | 0.2133080  | -0.2777750 | C | 1.2854560   | -8.2807620 | -2.7799160 | C | 12.1637480  | 1.1708290  | -1.8451410 |
| C | 6.4189120  | -0.8732310 | -0.3475800 | C | -1.6895490  | -6.9988620 | 0.9830320  | H | 10.1484410  | 1.8264210  | -1.4727000 |
| C | 5.9257830  | -2.1609770 | -0.0935190 | C | -2.2860870  | -7.9683760 | 1.7426370  | C | 12.5483720  | -1.1993310 | -1.6667270 |
| C | 4.2061480  | 0.0196800  | 0.0508280  | C | -2.2592460  | -7.8967840 | 3.1531840  | H | 10.8332510  | -2.3937870 | -1.1552040 |
| C | 0.5597120  | 1.6013560  | 2.0512520  | H | -1.6751000  | -6.7327230 | 4.8460340  | C | 13.0280570  | 0.0828060  | -1.9152470 |
| C | 0.7314400  | 2.7926370  | 2.7334810  | H | 0.8262830   | -7.1650830 | -4.5422920 | H | 12.5335990  | 2.1729430  | -2.0384600 |
| C | 1.9057730  | 3.0316300  | 3.4611200  | H | 0.8749930   | -7.1973020 | 0.4107710  | H | 13.2190630  | -2.0511860 | -1.7205270 |
| C | 2.8999910  | 2.0454340  | 3.4830900  | H | 1.7221480   | -9.1168120 | -0.8295680 | H | 14.0739790  | 0.2338510  | -2.1633660 |
| C | 2.7290260  | 0.8589920  | 2.7882720  | H | 1.6552980   | -9.1460860 | -3.3211230 | C | 2.4169250   | 6.5263960  | 5.4731350  |
| C | -1.4616690 | 0.7696930  | -2.0526300 | H | -1.7375900  | -7.0639370 | -0.0958550 | C | 3.5920870   | 6.7621190  | 6.1983990  |
| C | -3.9072800 | -0.8897390 | -0.4318840 | H | -2.7920430  | -8.7962600 | 1.2556680  | C | 1.4203720   | 7.5107360  | 5.4507090  |
| C | -0.6638620 | 1.0073740  | -3.1764950 | H | -2.7229710  | -8.6801490 | 3.7446180  | C | 3.7631370   | 7.9557670  | 6.8841340  |
| C | -0.6398280 | 2.2540260  | -3.7747980 | C | -7.9910480  | 0.0210050  | 0.2135310  | H | 4.3643320   | 6.0006010  | 6.2164850  |
| C | -1.4053300 | 3.3074480  | -3.2540610 | C | -9.1555020  | 0.2852500  | 0.4007080  | C | 1.5984440   | 8.7019660  | 6.1388570  |
| C | -2.1897430 | 3.0741210  | -2.1179990 | C | -1.3832660  | 4.5948710  | -3.8697960 | H | 0.5100560   | 7.3291970  | 4.8894980  |
| C | -2.2197470 | 1.8202120  | -1.5283270 | C | -1.3640720  | 5.6842820  | -4.3928800 | C | 2.7685300   | 8.9282590  | 6.8567910  |
| C | -4.6614330 | -0.2696240 | -1.4311630 | C | -10.5321440 | 0.5970230  | 0.6222240  | H | 4.6775800   | 8.1281750  | 7.4430620  |
| C | -5.9997000 | 0.0237090  | -1.2236600 | C | -11.2883430 | 1.2222820  | -0.3776950 | H | 0.8198680   | 9.4579980  | 6.1149210  |
| C | -6.6153790 | -0.2909420 | -0.0057780 | C | -11.1437710 | 0.2813410  | 1.8424310  | H | 2.9051010   | 9.8613420  | 7.3943840  |
| C | -5.8579280 | -0.9186380 | 0.9933980  | C | -12.6246810 | 1.5233650  | -0.1588710 |   |             |            |            |

SCF Done: E(RCAM-B3LYP) = -3370.52872393 A.U.

Low frequencies --- -0.5844 -0.3988 -0.0019 -0.0014 0.0004 0.4254  
 Zero-point correction = 1.057890 (Hartree/Particle)  
 Thermal correction to Energy = 1.124482  
 Thermal correction to Enthalpy = 1.125426  
 Thermal correction to Gibbs Free Energy = 0.936541  
 Sum of electronic and zero-point Energies = -3369.470834  
 Sum of electronic and thermal Energies = -3369.404242  
 Sum of electronic and thermal Enthalpies = -3369.403297  
 Sum of electronic and thermal Free Energies = -3369.592183

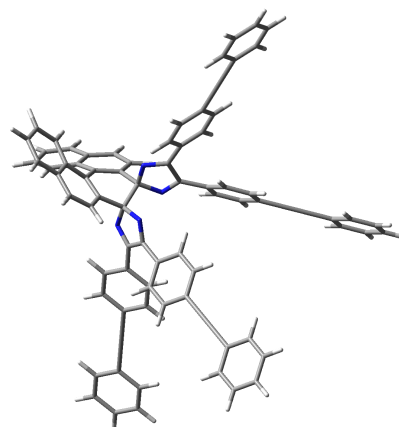

**Table S17.** Standard Orientation of the Optimized Geometry for BR of **3**.

|   | X          | Y          | Z          |   | X          | Y          | Z          |   | X           | Y          | Z          |
|---|------------|------------|------------|---|------------|------------|------------|---|-------------|------------|------------|
| C | 0.0206440  | -3.6069890 | 2.6321760  | C | 3.3931630  | -2.2995720 | 0.4796050  | H | 9.4757060   | -4.6942450 | -2.4277690 |
| C | 1.0189920  | -4.1696430 | 3.3615390  | H | -0.5116350 | -4.1716870 | 1.8771520  | C | 8.0954840   | -8.2965130 | -2.6964690 |
| C | 1.6940300  | -3.4229570 | 4.3642080  | H | 1.3068620  | -5.2040750 | 3.1964170  | H | 6.2948510   | -7.5048000 | -1.8242110 |
| C | 1.3189650  | -2.0702860 | 4.5863450  | H | 0.6231500  | 3.1653020  | 3.2831440  | C | 9.3862580   | -8.0144180 | -3.1325690 |
| C | 0.2829760  | -1.4795940 | 3.7971090  | H | -1.1278900 | 3.6031830  | 4.9714620  | H | 10.8884420  | -6.4934590 | -3.3744350 |
| C | -0.3743970 | -2.2492910 | 2.8363590  | H | -4.0164760 | 0.3137410  | -1.2614310 | H | 7.7047360   | -9.3065760 | -2.7703710 |
| C | -0.0912110 | -0.0604910 | 4.0854040  | H | -5.1157090 | 2.4618860  | -1.7335860 | H | 10.0050730  | -8.8038500 | -3.5475080 |
| C | 0.5315260  | 1.0231680  | 3.4651220  | H | -4.3706380 | 3.7381190  | 2.2930900  | C | 6.8565520   | 6.7798890  | -4.1743630 |
| C | 0.1300280  | 2.3516340  | 3.7995820  | H | -3.2476310 | 1.5784290  | 2.7632150  | C | 7.1441970   | 8.0876320  | -3.7620460 |
| C | -0.8349830 | 2.5862180  | 4.7261410  | H | -2.5012910 | -3.8080550 | -1.1420640 | C | 7.2229620   | 6.3758670  | -5.4648960 |
| C | -1.4729950 | 1.5084100  | 5.3969340  | H | -4.0572100 | -4.8579650 | -2.7643850 | C | 7.7834890   | 8.9677410  | -4.6228030 |
| C | -1.0959230 | 0.1756310  | 5.0752470  | H | -7.1589130 | -2.1795400 | -1.4992810 | H | 6.8606880   | 8.4016700  | -2.7632530 |
| C | -1.4473170 | -1.7536770 | 2.0010310  | H | -5.6074500 | -1.1286550 | 0.0957320  | C | 7.8619060   | 7.2615710  | -6.3201450 |
| C | 1.5690890  | 0.8902610  | 2.4651950  | H | 3.6563870  | 4.0323410  | 1.4691360  | H | 7.0004220   | 5.3637560  | -5.7853760 |
| N | 2.1072680  | 1.9936660  | 1.8561920  | H | 4.8092660  | 5.6142680  | -0.0551760 | C | 8.1440370   | 8.5585030  | -5.9027850 |
| C | 2.9905130  | 1.5115570  | 1.0038090  | H | 4.9789860  | 2.5648210  | -3.0663460 | H | 8.0014780   | 9.9787650  | -4.2931570 |
| C | 3.0097060  | 0.0398830  | 1.1494800  | H | 3.8518200  | 0.9930910  | -1.5447900 | H | 8.1411830   | 6.9381720  | -7.3180320 |
| N | 2.0964180  | -0.2905180 | 2.0475930  | H | 5.5663190  | 0.2953510  | 0.1804180  | H | 8.6440730   | 9.2494660  | -6.5742360 |
| N | -2.0644840 | -2.5708000 | 1.0898820  | H | 6.9663340  | -1.4955750 | -0.7556260 | C | -5.4746090  | 4.4849680  | -0.0248880 |
| C | -2.9908680 | -1.8155910 | 0.5322040  | H | 3.8034960  | -4.3193830 | -0.1060380 | C | -6.0182630  | 5.5395080  | -0.2579160 |
| C | -2.8901470 | -0.4619340 | 1.1183570  | H | 2.3998020  | -2.5170660 | 0.8549430  | C | -6.6121770  | -4.1869630 | -3.1768290 |
| N | -1.9379190 | -0.4868020 | 2.0363810  | C | 2.7217380  | -3.9979390 | 5.1452290  | C | -7.3743800  | -4.7007700 | -3.9621380 |
| C | -3.5886720 | 0.7794500  | 0.8014400  | C | -2.4700000 | 1.7330420  | 6.3739080  | C | -6.6603530  | 6.7850700  | -0.5342540 |
| C | -3.9312070 | -2.3758740 | -0.4371940 | C | -1.7452760 | -0.8870160 | 5.7577860  | C | -7.1786800  | 7.0491910  | -1.8088710 |
| C | -3.6773110 | 1.7745570  | 1.7876680  | C | -2.7078520 | -0.6400270 | 6.7012690  | C | -6.7803220  | 7.7592510  | 0.4655560  |
| C | -4.7233640 | 2.2599170  | -0.7429490 | C | -3.0768830 | 0.6843820  | 7.0150990  | C | -7.8015890  | 8.2599980  | -2.0736000 |
| C | -4.8343290 | 3.2413200  | 0.2512680  | C | 2.0017560  | -1.3433930 | 5.5967200  | H | -7.0859290  | 6.2960030  | -2.5839130 |
| C | -4.2970980 | 2.9795970  | 1.5214200  | C | 2.9941580  | -1.9262940 | 6.3404110  | C | -7.4046080  | 8.9677150  | 0.1934750  |
| C | -4.1113830 | 1.0488460  | -0.4711560 | C | 3.3609510  | -3.2688630 | 6.1142170  | H | -6.3790790  | 7.5560450  | 1.4526230  |
| C | -3.5191350 | -3.4488870 | -1.2405750 | H | 2.9963280  | -5.0328300 | 4.9612840  | C | -7.9166490  | 9.2219670  | -1.0749930 |
| C | -4.3890000 | -4.0365300 | -2.1387230 | H | -2.7451530 | 2.7576650  | 6.6082720  | H | -8.1993160  | 8.4543220  | -3.0647670 |
| C | -5.7118000 | -3.5814980 | -2.2513300 | H | -1.4714790 | -1.9088070 | 5.5235950  | H | -7.4919480  | 9.7155450  | 0.9754590  |
| C | -6.1330450 | -2.5249500 | -1.4330490 | H | -3.1904520 | -1.4684800 | 7.2100320  | H | -8.4044910  | 10.1686380 | -1.2850960 |
| C | -5.2556580 | -1.9313420 | -0.5418770 | H | -3.8406710 | 0.8697160  | 7.7639720  | C | -8.2753990  | -5.3075690 | -4.8896870 |
| C | 3.7068610  | 2.3961100  | 0.0860860  | H | 1.7303600  | -0.3101290 | 5.7772320  | C | -9.5997030  | -4.8610380 | -4.9885890 |
| C | 3.8636250  | -0.9784020 | 0.5465200  | H | 3.5027180  | -1.3511300 | 7.1076730  | C | -7.8466160  | -6.3572370 | -5.7126580 |
| C | 3.9663230  | 3.7168090  | 0.4796440  | H | 4.1493310  | -3.7212390 | 6.7077540  | C | -10.4718350 | -5.4527720 | -5.8904810 |
| C | 4.6023420  | 4.5982180  | -0.3731470 | C | 6.2901110  | -4.0636920 | -1.0560470 | H | -9.9328560  | -4.0485850 | -4.3517780 |
| C | 4.9851620  | 4.1927670  | -1.6610050 | C | 6.9789450  | -4.9433660 | -1.5182700 | C | -8.7244280  | -6.9440400 | -6.6122600 |
| C | 4.7051230  | 2.8808740  | -2.0657440 | C | 5.6414800  | 5.1005500  | -2.5436240 | H | -6.8215820  | -6.7038650 | -5.6368610 |
| C | 4.0774340  | 1.9971530  | -1.2047200 | C | 6.1985300  | 5.8706080  | -3.2908570 | C | -10.0379730 | -6.4946250 | -6.7041950 |
| C | 5.1642600  | -0.7073810 | 0.0989360  | C | 7.7932010  | -5.9820880 | -2.0642990 | H | -11.4958520 | -5.0991250 | -5.9588350 |
| C | 5.9583640  | -1.7146520 | -0.4207470 | C | 9.0940690  | -5.7066000 | -2.5058240 | H | -8.3817950  | -7.7566770 | -7.2451690 |
| C | 5.4762880  | -3.0273740 | -0.5113480 | C | 7.3018400  | -7.2902880 | -2.1656180 | H | -10.7226840 | -6.9557980 | -7.4090320 |
| C | 4.1803200  | -3.3040070 | -0.0482090 | C | 9.8819280  | -6.7179850 | -3.0354900 |   |             |            |            |

SCF Done: E(UCAM-B3LYP) = -3370.52200492 A.U.  
S\*\*2 before annihilation 1.1235, after 1.0309

Low frequencies --- -0.0093 -0.0032 -0.0017 0.1174 0.6787 1.0116  
Zero-point correction = 1.054124 (Hartree/Particle)  
Thermal correction to Energy = 1.121831  
Thermal correction to Enthalpy = 1.122776  
Thermal correction to Gibbs Free Energy = 0.929710  
Sum of electronic and zero-point Energies = -3369.467881  
Sum of electronic and thermal Energies = -3369.400174  
Sum of electronic and thermal Enthalpies = -3369.399229  
Sum of electronic and thermal Free Energies = -3369.592295

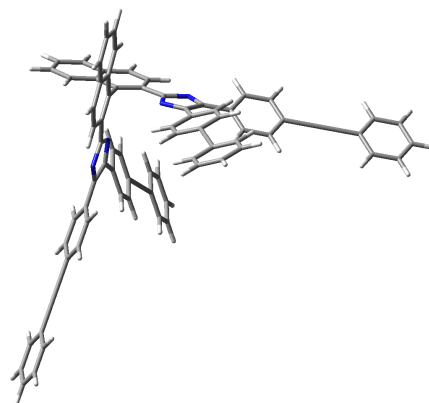

**Table S18.** Standard Orientation of the Optimized Geometry for TS1 of **3**.

|   | X          | Y          | Z          |   | X           | Y          | Z          |   | X           | Y          | Z          |
|---|------------|------------|------------|---|-------------|------------|------------|---|-------------|------------|------------|
| C | -2.0015820 | -3.6323650 | 2.7246240  | C | -4.5047270  | -1.0576760 | -0.0709460 | H | -9.6953900  | 3.1222790  | -2.6785830 |
| C | -2.9884390 | -4.5103010 | 3.0696610  | H | -1.8312890  | -2.7315610 | 3.3015620  | C | -12.1179420 | 2.1300220  | 0.1673660  |
| C | -3.2570080 | -5.6409350 | 2.2642600  | H | -3.6023550  | -4.3315290 | 3.9478790  | H | -10.5113970 | 0.8965000  | 0.8936240  |
| C | -2.4528300 | -5.8823550 | 1.1139460  | H | 0.7518550   | -3.4797280 | -2.9919650 | C | -12.5320920 | 3.0235750  | -0.8153970 |
| C | -1.3503420 | -5.0153800 | 0.8318720  | H | 1.8322710   | -5.6487480 | -3.4749710 | H | -11.9786890 | 4.0765110  | -2.6079890 |
| C | -1.1775610 | -3.8760640 | 1.6005580  | H | 2.9649030   | 0.2598860  | 0.0950280  | H | -12.7954340 | 1.8487940  | 0.9675430  |
| C | -0.4632800 | -5.2293420 | -0.3450550 | H | 5.3668870   | 0.4798860  | -0.4116260 | H | -13.5335070 | 3.4412960  | -0.7838890 |
| C | -0.2363380 | -4.1718160 | -1.2102540 | H | 6.0663950   | -3.4452170 | 1.1685940  | C | 1.6592090   | 6.8802110  | -3.5940360 |
| C | 0.6005890  | -4.3304190 | -2.3387900 | H | 3.6452140   | -3.6693380 | 1.6619090  | C | 2.7935440   | 7.0336760  | -4.4018560 |
| C | 1.2075580  | -5.5255430 | -2.5949690 | H | -1.2511540  | 0.9067500  | 1.5607030  | C | 0.9805810   | 8.0214040  | -3.1469290 |
| C | 1.0753200  | -6.6050590 | -1.6919500 | H | -1.1564930  | 3.2588900  | 2.3428840  | C | 3.2358120   | 8.3007220  | -4.7527050 |
| C | 0.2579460  | -6.4494830 | -0.5360160 | H | 2.9353800   | 2.6921870  | 3.4957400  | H | 3.3195570   | 6.1506500  | -4.7485240 |
| C | -0.2190330 | -2.8129540 | 1.2194120  | H | 2.8430390   | 0.3675130  | 2.7047310  | C | 1.4289640   | 9.2852130  | -3.5016430 |
| C | -0.7599920 | -2.8137320 | -0.9369130 | H | 1.2040680   | -0.1100750 | -2.8778530 | H | 0.1030650   | 7.9035510  | -2.5203600 |
| N | -0.0709370 | -1.7218340 | -1.4140140 | H | 1.9970000   | 2.1518150  | -3.5130160 | C | 2.5561200   | 9.4289970  | -4.3045500 |
| C | -0.9537510 | -0.7587480 | -1.5004840 | H | -1.3798260  | 3.8802470  | -1.5131020 | H | 4.1156680   | 8.4085440  | -5.3792400 |
| C | -2.2823200 | -1.3146130 | -1.1147660 | H | -2.1744920  | 1.6372440  | -0.9022700 | H | 0.8962790   | 10.1629190 | -3.1492790 |
| N | -2.1261910 | -2.5593440 | -0.7738710 | H | -3.3640750  | 0.4873060  | -2.8721230 | H | 2.9046350   | 10.4192910 | -4.5805120 |
| N | -0.4864090 | -1.5170210 | 1.6048660  | H | -5.6416310  | 1.4266110  | -2.8058940 | C | 7.2739170   | -1.3305210 | 0.0650440  |
| C | 0.6733500  | -0.9092490 | 1.6135150  | H | -6.4669510  | -0.8101730 | 0.7591900  | C | 8.4523440   | -1.2212630 | -0.1811590 |
| C | 1.7166660  | -1.8962120 | 1.2123340  | H | -4.1762250  | -1.7682060 | 0.6794870  | C | 0.9572210   | 4.4881320  | 3.4226660  |
| N | 1.1452980  | -3.0490410 | 1.0271760  | C | -4.3373360  | -6.5110840 | 2.5590730  | C | 1.0021660   | 5.6307870  | 3.8149590  |
| C | 3.1492880  | -1.7093890 | 0.9509960  | C | 1.7754710   | -7.8214450 | -1.8959770 | C | 9.8450790   | -1.0924450 | -0.4721120 |
| C | 0.7937990  | 0.4841840  | 2.0403230  | C | 0.2437600   | -7.5104200 | 0.4123170  | C | 10.3439530  | 0.0813450  | -1.0519300 |
| C | 4.0358010  | -2.7565990 | 1.2262780  | C | 0.9499850   | -8.6627740 | 0.1993030  | C | 10.7307350  | -2.1383660 | -0.1813670 |
| C | 4.9918340  | -0.4222640 | 0.0591940  | C | 1.7135390   | -8.8319850 | -0.9774940 | C | 11.6969670  | 0.2027250  | -1.3328770 |
| C | 5.8831930  | -1.4609740 | 0.3572870  | C | -2.8263590  | -6.9568170 | 0.2591400  | H | 9.6593520   | 0.8919310  | -1.2775690 |
| C | 5.3836230  | -2.6333520 | 0.9429740  | C | -3.8899830  | -7.7643270 | 0.5569810  | C | 12.0825060  | -2.0098460 | -0.4650980 |
| C | 3.6440530  | -0.5450210 | 0.3537660  | C | -4.6475260  | -7.5533790 | 1.7307590  | H | 10.3458050  | -3.0478050 | 0.2673500  |
| C | -0.3337960 | 1.3153820  | 1.9673550  | H | -4.9258100  | -6.3190050 | 3.4520210  | C | 12.5697240  | -0.8407410 | -1.0409250 |
| C | -0.2815120 | 2.6218020  | 2.4118000  | H | 2.3788130   | -7.9249830 | -2.7936100 | H | 12.0726400  | 1.1167250  | -1.7822070 |
| C | 0.9012370  | 3.1402120  | 2.9609530  | H | -0.3271570  | -7.3943540 | 1.3245520  | H | 12.7597110  | -2.8266370 | -0.2356710 |
| C | 2.0227300  | 2.3058700  | 3.0555810  | H | 0.9271100   | -9.4529280 | 0.9433830  | H | 13.6280050  | -0.7430080 | -1.2618770 |
| C | 1.9692370  | 0.9991160  | 2.6021050  | H | 2.2601830   | -9.7557670 | -1.1397450 | C | 1.0559490   | 6.9804070  | 4.2795620  |
| C | -0.5519900 | 0.5987900  | -1.8727600 | H | -2.2645990  | -7.1265990 | -0.6502480 | C | -0.0843160  | 7.7931200  | 4.2326090  |
| C | -3.6091510 | -0.6867760 | -1.0812150 | H | -4.1576010  | -8.5717290 | -0.1174710 | C | 2.2494300   | 7.5086610  | 4.7889160  |
| C | 0.6384980  | 0.7705560  | -2.5963180 | H | -5.4819560  | -8.2084110 | 1.9612960  | C | -0.0285780  | 9.1030550  | 4.6854870  |
| C | 1.0820410  | 2.0314370  | -2.9432010 | C | -7.5217080  | 0.9313900  | -0.9731410 | H | -1.0090000  | 7.3848080  | 3.8390950  |
| C | 0.3560080  | 3.1719140  | -2.5644980 | C | -8.6364900  | 1.3975270  | -0.9382850 | C | 2.2976080   | 8.8195750  | 5.2398200  |
| C | -0.8211200 | 3.0047800  | -1.8250800 | C | 0.8115590   | 4.4744220  | -2.9238850 | H | 3.1328220   | 6.8803100  | 4.8255680  |
| C | -1.2684790 | 1.7383030  | -1.4866050 | C | 1.2005310   | 5.5770320  | -3.2312070 | C | 1.1606580   | 9.6200010  | 5.1898070  |
| C | -4.0349230 | 0.2113390  | -2.0656900 | C | -9.9542710  | 1.9476840  | -0.8968350 | H | -0.9180600  | 9.7239900  | 4.6452010  |
| C | -5.3154520 | 0.7377370  | -2.0344060 | C | -10.3792750 | 2.8480180  | -1.8825230 | H | 3.2274240   | 9.2189460  | 5.6325760  |
| C | -6.2055500 | 0.3814820  | -1.0126410 | C | -10.8390900 | 1.5939050  | 0.1301880  | H | 1.2013000   | 10.6453830 | 5.5437190  |
| C | -5.7810940 | -0.5265660 | -0.0316160 | C | -11.6596370 | 3.3800430  | -1.8388820 |   |             |            |            |

SCF Done: E(UCAM-B3LYP) = -3370.49039252 A.U.  
 S\*\*2 before annihilation 0.4056, after 0.0728

Low frequencies --- -634.4742 -0.4931 -0.0035 -0.0025 0.0005 0.1752  
 \*\*\*\*\* 1 imaginary frequencies (negative Signs) \*\*\*\*\*

Zero-point correction = 1.054487 (Hartree/Particle)  
 Thermal correction to Energy = 1.121214  
 Thermal correction to Enthalpy = 1.122158  
 Thermal correction to Gibbs Free Energy = 0.933836  
 Sum of electronic and zero-point Energies = -3369.435906  
 Sum of electronic and thermal Energies = -3369.369179  
 Sum of electronic and thermal Enthalpies = -3369.368234  
 Sum of electronic and thermal Free Energies = -3369.556557

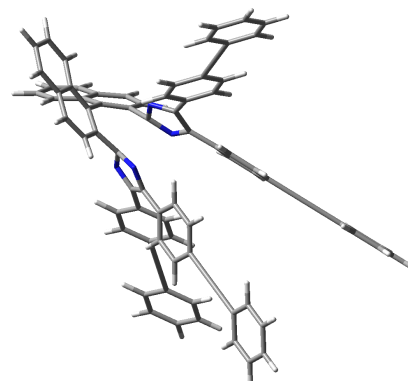

**Table S19.** Standard Orientation of the Optimized Geometry for TS2 of **3**.

|   | X          | Y          | Z          |   | X          | Y          | Z          |   | X           | Y           | Z          |
|---|------------|------------|------------|---|------------|------------|------------|---|-------------|-------------|------------|
| C | -0.7743250 | -3.7928400 | 3.1399240  | C | 2.1610510  | -2.8923870 | -0.0664170 | H | 7.2031620   | -7.1101800  | -2.8924100 |
| C | 0.1665890  | -4.2741960 | 3.9988010  | H | -1.3800990 | -4.4478590 | 2.5234730  | C | 4.5974500   | -9.7831380  | -3.9021940 |
| C | 0.9454090  | -3.3962120 | 4.8052530  | H | 0.3356800  | -5.3434230 | 4.0884260  | H | 3.1364140   | -8.4601660  | -3.0390120 |
| C | 0.7431740  | -1.9889030 | 4.7205760  | H | 1.1363740  | 2.9145740  | 3.1845910  | C | 5.9446770   | -9.9871690  | -4.1835990 |
| C | -0.2323650 | -1.5072060 | 3.8009360  | H | -0.6081350 | 3.7581720  | 4.7112220  | H | 7.9335680   | -9.1800940  | -4.0375850 |
| C | -0.9616580 | -2.3940180 | 3.0339110  | H | -3.0375350 | 0.8185110  | -1.3554650 | H | 3.8632280   | -10.5312380 | -4.1843140 |
| C | -0.5637810 | -0.0506500 | 3.6843910  | H | -3.2387800 | 3.1352880  | -2.1724520 | H | 6.2641270   | -10.8949520 | -4.6857790 |
| C | 0.4501330  | 0.8772130  | 3.2137330  | H | -2.9732130 | 4.5786590  | 1.8553480  | C | 9.2878770   | 4.5213910   | -3.0939300 |
| C | 0.3840730  | 2.2531790  | 3.5952490  | H | -2.7904100 | 2.2565030  | 2.6717480  | C | 10.0059290  | 5.5577610   | -2.4830750 |
| C | -0.5770140 | 2.7091860  | 4.4317110  | H | -4.0303050 | -3.3867650 | -0.5537130 | C | 9.6119270   | 4.1474650   | -4.4046560 |
| C | -1.5713060 | 1.8289410  | 4.9808510  | H | -5.9924490 | -3.7874050 | -2.0196260 | C | 11.0238040  | 6.2027890   | -3.1701230 |
| C | -1.5652720 | 0.4586220  | 4.6301230  | H | -7.4062130 | 0.1731440  | -1.1789270 | H | 9.7555310   | 5.8483050   | -1.4684450 |
| C | -1.8465680 | -1.7583280 | 2.0985120  | H | -5.4615870 | 0.5637900  | 0.2757420  | C | 10.6310470  | 4.7971350   | -5.0854630 |
| C | 1.4538310  | 0.4820730  | 2.3188380  | H | 4.6876800  | 2.6568480  | 1.9050070  | H | 9.0562740   | 3.3455150   | -4.8786950 |
| N | 2.4233260  | 1.3660240  | 1.8799510  | H | 6.5173280  | 3.8116980  | 0.6918010  | C | 11.3394050  | 5.8253130   | -4.4715530 |
| C | 3.1526430  | 0.6749410  | 1.0420340  | H | 5.8259400  | 1.2974730  | -2.7130900 | H | 11.5737880  | 7.0046600   | -2.6875830 |
| C | 2.6140550  | -0.7099910 | 0.9874470  | H | 4.0249300  | 0.1402540  | -1.4991980 | H | 10.8738280  | 4.4997370   | -6.1008090 |
| N | 1.5632700  | -0.7709830 | 1.7688210  | H | 5.1783480  | -1.3664220 | 0.2615780  | H | 12.1363080  | 6.3319930   | -5.0068230 |
| N | -2.8321920 | -2.2810830 | 1.3800420  | H | 5.9031540  | -3.4268470 | -0.8699380 | C | -3.2388990  | 5.3608920   | -0.6880900 |
| C | -3.4386130 | -1.2012320 | 0.8216600  | H | 1.8436810  | -4.8079800 | -0.9741770 | C | -3.3383780  | 6.4967060   | -1.0896400 |
| C | -2.7531350 | -0.0104020 | 1.2071000  | H | 1.1177720  | -2.7393880 | 0.1851860  | C | -7.9589570  | -2.0543060  | -2.5495390 |
| N | -1.7244470 | -0.4056550 | 1.9780130  | C | 1.9087810  | -3.8991970 | 5.7100640  | C | -8.9166510  | -2.2448090  | -3.2627750 |
| C | -2.8985410 | 1.3709810  | 0.7195290  | C | -2.5363140 | 2.3089150  | 5.8836240  | C | -3.4561690  | 7.8383090   | -1.5665560 |
| C | -4.5909700 | -1.3800260 | -0.0589420 | C | -2.5226120 | -0.3881230 | 5.2177030  | C | -3.5759270  | 8.0965760   | -2.9384060 |
| C | -2.8779720 | 2.4483910  | 1.6092950  | C | -3.4657820 | 0.1037270  | 6.0954830  | C | -3.4538630  | 8.9146790   | -0.6697070 |
| C | -3.1429130 | 2.9405540  | -1.1097260 | C | -3.4755930 | 1.4628790  | 6.4323820  | C | -3.6903610  | 9.4003670   | -3.3982760 |
| C | -3.1225770 | 4.0190360  | -0.2144740 | C | 1.4960710  | -1.1442050 | 5.5756350  | H | -3.5776360  | 7.2646470   | -3.6344660 |
| C | -2.9873650 | 3.7521620  | 1.1528790  | C | 2.4243990  | -1.6642750 | 6.4395130  | C | -3.5687530  | 10.2159060  | -1.1366950 |
| C | -3.0315210 | 1.6407540  | -0.6481760 | C | 2.6385570  | -3.0563090 | 6.5071440  | H | -3.3611350  | 8.7168470   | 0.3928150  |
| C | -4.7704760 | -2.6102820 | -0.7079160 | H | 2.0584920  | -4.9739680 | 5.7627110  | C | -3.6872720  | 10.4633560  | -2.5006520 |
| C | -5.8669450 | -2.8330720 | -1.5193690 | H | -2.5263690 | 3.3632270  | 6.1450950  | H | -3.7823830  | 9.5880490   | -4.4635520 |
| C | -6.8288100 | -1.8299150 | -1.7090430 | H | -2.5227170 | -1.4427030 | 4.9700850  | H | -3.5657160  | 11.0418560  | -0.4321650 |
| C | -6.6595990 | -0.6032800 | -1.0514850 | H | -4.2000010 | -0.5685450 | 6.5270600  | H | -3.7769260  | 11.4825580  | -2.8633700 |
| C | -5.5615560 | -0.3844400 | -0.2390780 | H | -4.2161290 | 1.8468250  | 7.1267490  | C | -10.0480240 | -2.4692010  | -4.1051300 |
| C | 4.2528160  | 1.3006410  | 0.3035230  | H | 1.3307510  | -0.0730070 | 5.5470010  | C | -11.0033910 | -1.4619850  | -4.2953690 |
| C | 3.0873150  | -1.8952330 | 0.2717410  | H | 2.9936520  | -1.0005770 | 7.0827700  | C | -10.2186760 | -3.6996890  | -4.7533220 |
| C | 4.9559580  | 2.3563360  | 0.8986750  | H | 3.3741070  | -3.4568310 | 7.1975420  | C | -12.1009180 | -1.6834540  | -5.1143210 |
| C | 5.9707540  | 3.0029970  | 0.2190890  | C | 4.3452850  | -5.4448630 | -1.6712460 | H | -10.8729920 | -0.5087420  | -3.7944130 |
| C | 6.3043920  | 2.6247250  | -1.0901040 | C | 4.7016760  | -6.4557870 | -2.2303680 | C | -11.3186870 | -3.9139930  | -5.5708410 |
| C | 5.5873620  | 1.5841650  | -1.6948240 | C | 7.3511760  | 3.2903730  | -1.7941270 | H | -9.4802030  | -4.4806620  | -4.6071130 |
| C | 4.5788140  | 0.9310330  | -1.0067150 | C | 8.2390340  | 3.8547430  | -2.3895880 | C | -12.2625090 | -2.9083090  | -5.7541930 |
| C | 4.4398640  | -2.1064890 | -0.0234430 | C | 5.1223290  | -7.6503370 | -2.8910400 | H | -12.8345620 | -0.8955860  | -5.2541460 |
| C | 4.8523760  | -3.2679510 | -0.6538620 | C | 6.4769610  | -7.8635720 | -3.1781490 | H | -11.4403060 | -4.8714590  | -6.0678280 |
| C | 3.9225250  | -4.2527780 | -1.0122990 | C | 4.1854690  | -8.6243300 | -3.2606280 | H | -13.1223620 | -3.0787950  | -6.3944860 |
| C | 2.5686040  | -4.0473700 | -0.7056540 | C | 6.8814810  | -9.0249000 | -3.8199110 |   |             |             |            |

SCF Done: E(UCAM-B3LYP) = -3370.48816144 A.U.  
 S\*\*2 before annihilation 0.5800, after 0.2209

Low frequencies ----1619.7052 -0.6153 -0.0026 -0.0019 -0.0018 0.3520  
 \*\*\*\*\* 1 imaginary frequencies (negative Signs) \*\*\*\*\*

Zero-point correction = 1.052868 (Hartree/Particle)  
 Thermal correction to Energy = 1.120080  
 Thermal correction to Enthalpy = 1.121025  
 Thermal correction to Gibbs Free Energy = 0.930105  
 Sum of electronic and zero-point Energies = -3369.435294  
 Sum of electronic and thermal Energies = -3369.368081  
 Sum of electronic and thermal Enthalpies = -3369.367137  
 Sum of electronic and thermal Free Energies = -3369.558056

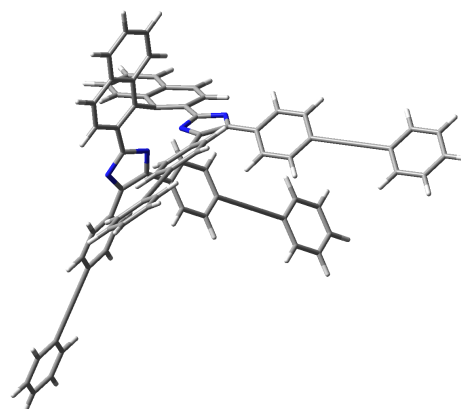

Table S20. Standard Orientation of the Optimized Geometry for 5MR of 4 .

|   | X          | Y          | Z          |   | X          | Y          | Z          |   | X           | Y           | Z          |
|---|------------|------------|------------|---|------------|------------|------------|---|-------------|-------------|------------|
| C | 0.8377190  | 2.3570950  | -4.6030400 | H | 1.9782200  | 2.4572120  | -6.4004950 | H | 12.0726530  | 5.7221300   | -0.0832160 |
| C | 1.2575700  | 1.8963500  | -5.8129920 | H | -1.9052780 | -3.2108680 | -1.6911390 | C | 5.1514000   | -7.5181280  | 4.5988340  |
| C | 0.7756390  | 0.6716810  | -6.3405590 | H | -4.1858440 | -3.1543820 | -2.5787610 | C | 4.9746570   | -8.9005140  | 4.4556360  |
| C | -0.1695370 | -0.1443340 | -5.6213610 | H | -1.8908010 | -0.2138410 | 1.0101330  | C | 5.9478040   | -7.0376480  | 5.6465240  |
| C | -0.6364170 | 0.3973630  | -4.3764050 | H | -3.5962460 | -1.5666930 | 2.1846050  | C | 5.5817680   | -9.7787810  | 5.3412650  |
| C | -0.1161600 | 1.5965070  | -3.9173830 | H | -6.5653240 | -0.2347870 | -0.6089230 | H | 4.3581600   | -9.2737280  | 3.6449170  |
| C | -1.7325810 | -0.0888720 | -3.3566020 | H | -4.8612360 | 1.1199150  | -1.7747040 | C | 6.5516940   | -7.9219350  | 6.5283540  |
| C | -1.3003110 | -1.3368470 | -2.5579280 | H | 0.2144640  | 4.2579580  | 0.1350680  | H | 6.0851920   | -5.9675270  | 5.7586130  |
| C | -2.2436290 | -2.3927340 | -2.3134730 | H | 0.0689800  | 5.6747460  | 2.1618050  | C | 6.3711470   | -9.2933890  | 6.3790670  |
| C | -3.4901990 | -2.3516850 | -2.8045070 | H | -3.7834180 | 4.0081780  | 3.0276200  | H | 5.4381350   | -10.8480380 | 5.2211170  |
| C | -3.9773990 | -1.2716890 | -3.6411280 | H | -3.6383160 | 2.6112080  | 1.0173310  | H | 7.1665950   | -7.5388130  | 7.3367220  |
| C | -3.1573480 | -0.1698960 | -3.9611500 | H | 1.3306180  | -4.8954830 | -0.7081010 | H | 6.8449220   | -9.9829900  | 7.0706560  |
| C | -0.7425490 | 1.9453660  | -2.6644980 | H | 2.4164610  | -6.4789500 | 0.8620890  | C | -6.1828410  | -1.7810200  | 1.5378500  |
| C | -0.0709390 | -1.4270860 | -1.9597320 | H | 4.1764460  | -3.1746410 | 2.9531730  | C | -7.0165450  | -2.4459960  | 2.1066560  |
| N | 0.2871370  | -2.5277560 | -1.1773060 | H | 3.1122690  | -1.6071400 | 1.3816950  | C | -1.9549490  | 5.7487720   | 3.9120160  |
| C | 1.4686990  | -2.2422100 | -0.7139070 | H | 4.4345200  | -1.8553700 | -0.9434030 | C | -2.0310780  | 6.4389980   | 4.9017280  |
| C | 1.8776150  | -0.9155810 | -1.2450440 | H | 6.4847590  | -0.5090810 | -0.7262010 | C | -8.0004370  | -3.2327840  | 2.7810470  |
| N | 0.9162070  | -0.4563270 | -1.9916590 | H | 4.1560000  | 3.0852500  | -0.9523240 | C | -7.6432540  | -4.0283580  | 3.8774910  |
| N | -0.6111330 | 2.8492670  | -1.7320290 | H | 2.0941960  | 1.7324130  | -1.1898790 | C | -9.3350250  | -3.2192180  | 2.3552480  |
| C | -1.5391880 | 2.4930190  | -0.7702400 | C | 1.2666380  | 0.2717100  | -7.6081190 | C | -8.6008180  | -4.7911090  | 4.5299470  |
| C | -2.2258370 | 1.3471850  | -1.1494880 | C | -5.2860910 | -1.3617730 | -4.1206090 | H | -6.6104130  | -4.0394280  | 4.2087180  |
| N | -1.7046400 | 1.0358920  | -2.3917710 | C | -3.6999960 | 0.8636180  | -4.7528340 | C | -10.2872040 | -3.9845000  | 3.0126130  |
| C | -3.2561860 | 0.5410720  | -0.4654740 | C | -5.0155760 | 0.7356420  | -5.2129650 | H | -9.6133480  | -2.6027230  | 1.5072050  |
| C | -1.6822210 | 3.3143250  | 0.4416940  | C | -5.8092480 | -0.3598590 | -4.9131300 | C | -9.9240560  | -4.7720470  | 4.1005400  |
| C | -4.5812770 | 0.5281520  | -0.9094580 | C | -0.5225590 | -1.4039160 | -6.2258320 | H | -8.3128860  | -5.4036400  | 5.3786310  |
| C | -3.8705900 | -0.9777460 | 1.3162810  | C | -0.0107170 | -1.7328600 | -7.4597090 | H | -11.3186010 | -3.9658910  | 2.6745180  |
| C | -5.1970020 | -0.9963330 | 0.8654610  | C | 0.8725590  | -0.9033580 | -8.1722850 | H | -10.6712310 | -5.3696650  | 4.6132690  |
| C | -5.5395650 | -0.2308370 | -0.2564550 | H | 1.9689480  | 0.9270880  | -8.1146500 | C | -2.1217390  | 7.2541850   | 6.0713310  |
| C | -2.9167700 | -0.2196650 | 0.6574820  | H | -5.8832110 | -2.2286830 | -3.8541230 | C | -3.2496100  | 7.1864300   | 6.9000200  |
| C | -0.6534210 | 4.2012590  | 0.7814250  | H | -5.4223350 | 1.5337440  | -5.8261140 | C | -1.0842170  | 8.1338280   | 6.4077090  |
| C | -0.7388070 | 4.9953820  | 1.9107050  | H | -6.8249420 | -0.4223050 | -5.2902150 | C | -3.3343450  | 7.9794830   | 8.0351110  |
| C | -1.8639600 | 4.9334210  | 2.7437540  | H | -0.2923770 | -2.6879440 | -7.8929810 | H | -4.0541820  | 6.5061910   | 6.6418910  |
| C | -2.9001940 | 4.0569990  | 2.3995830  | H | 1.2446240  | -1.2116330 | -9.1440040 | C | -1.1756810  | 8.9239090   | 7.5443560  |
| C | -2.8116530 | 3.2651720  | 1.2666410  | C | 6.6492500  | 2.1578810  | -0.6841940 | H | -0.2099600  | 8.1881800   | 5.7678630  |
| C | 2.1646850  | -3.1485760 | 0.2107530  | C | 7.6554660  | 2.8184310  | -0.5728490 | C | -2.2993520  | 8.8501150   | 8.3614280  |
| C | 3.1188530  | -0.1518670 | -1.0601490 | C | 4.0006920  | -5.8415670 | 2.9192520  | H | -4.2135460  | 7.9176690   | 8.6690400  |
| C | 1.9667500  | -4.5288500 | 0.0895740  | C | 4.5278860  | -6.6104030 | 3.6887140  | H | -0.3649860  | 9.6014650   | 7.7940990  |
| C | 2.5678210  | -5.4103410 | 0.9692090  | C | 8.8442820  | 3.5996690  | -0.4411770 | H | -2.3682770  | 9.4695300   | 9.2502620  |
| C | 3.3783650  | -4.9346450 | 2.0100890  | C | 10.0948160 | 2.9773090  | -0.3332600 | C | -2.9877740  | 2.1361300   | -5.1471680 |
| C | 3.5632940  | -3.5526370 | 2.1424870  | C | 8.7752060  | 4.9987960  | -0.4181190 | H | -2.6110890  | 2.6854770   | -4.2824560 |
| C | 2.9665230  | -2.6736250 | 1.2536570  | C | 11.2468930 | 3.7393450  | -0.2054990 | H | -2.1416070  | 1.9489920   | -5.8112960 |
| C | 4.3652270  | -0.7735190 | -0.9328970 | H | 10.1496750 | 1.8941160  | -0.3510160 | H | -3.6836390  | 2.7926780   | -5.6744410 |
| C | 5.5210970  | -0.0196310 | -0.8151740 | C | 9.9315220  | 5.7543170  | -0.2899830 | C | -1.3899830  | -2.4362100  | -5.5629870 |
| C | 5.4602040  | 1.3797210  | -0.8153070 | H | 7.8075730  | 5.4818660  | -0.5013240 | H | -0.9785620  | -2.7503810  | -4.6021680 |
| C | 4.2105230  | 2.0020660  | -0.9492840 | C | 11.1694900 | 5.1283350  | -0.1834210 | H | -2.4076710  | -2.0849280  | -5.3961170 |
| C | 3.0585530  | 1.2475730  | -1.0772260 | H | 12.2106450 | 3.2466730  | -0.1226210 | H | -1.4532070  | -3.3269660  | -6.1926130 |
| H | 1.1960810  | 3.2863660  | -4.1745600 | H | 9.8663230  | 6.8377590  | -0.2730450 |   |             |             |            |

SCF Done: E(RCAM-B3LYP) = -3449.10436518 A.U.

Low frequencies --- -0.3267 -0.0030 -0.0022 -0.0015 0.6483 0.8784  
 Zero-point correction = 1.115130 (Hartree/Particle)  
 Thermal correction to Energy = 1.185037  
 Thermal correction to Enthalpy = 1.185981  
 Thermal correction to Gibbs Free Energy = 0.990607  
 Sum of electronic and zero-point Energies = -3447.989235  
 Sum of electronic and thermal Energies = -3447.919329  
 Sum of electronic and thermal Enthalpies = -3447.918384  
 Sum of electronic and thermal Free Energies = -3448.113758

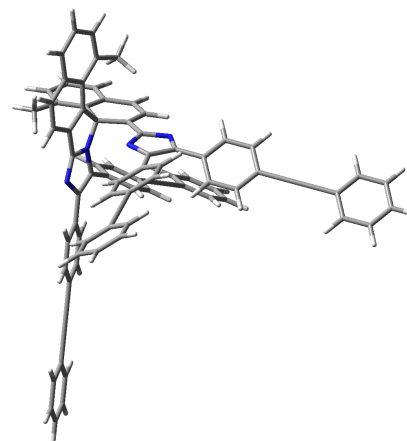

**Table S21.** Standard Orientation of the Optimized Geometry for 6MR of 4.

|   | X          | Y          | Z          |   | X           | Y          | Z          |   | X           | Y          | Z          |
|---|------------|------------|------------|---|-------------|------------|------------|---|-------------|------------|------------|
| C | -0.0588850 | -3.4167470 | 2.8666350  | H | -0.3762510  | -4.4862520 | 4.6853250  | H | -14.2288860 | 1.8395430  | 1.2885450  |
| C | -0.4470480 | -4.4999800 | 3.6015620  | H | -0.7052580  | -2.6204470 | -3.3170370 | C | -1.2546610  | 7.1807330  | -5.0202670 |
| C | -1.0298780 | -5.6262690 | 2.9745130  | H | -0.3375520  | -4.7379350 | -4.5443360 | C | -0.4657050  | 7.3970230  | -6.1575120 |
| C | -1.1542040 | -5.6659530 | 1.5514040  | H | 3.5635500   | 1.0205070  | 0.0751280  | C | -2.0067550  | 8.2419080  | -4.4998760 |
| C | -0.4858150 | -4.6341050 | 0.8034810  | H | 5.9341350   | 1.3351540  | -0.5123360 | C | -0.4322480  | 8.6471260  | -6.7578280 |
| C | -0.0861590 | -3.4848880 | 1.4625600  | H | 6.5807320   | -2.8928180 | -0.2018580 | H | 0.1171870   | 6.5760680  | -6.5610620 |
| C | -0.2257070 | -4.6925500 | -0.6601140 | H | 4.1859290   | -3.2082140 | 0.3675330  | C | -1.9682860  | 9.4892690  | -5.1055660 |
| C | -0.4595160 | -3.5347080 | -1.3804710 | H | -0.3100850  | 1.5953420  | 1.5190720  | H | -2.6178700  | 8.0754590  | -3.6192840 |
| C | -0.4872560 | -3.5389700 | -2.7855790 | H | 0.0324680   | 3.7231590  | 2.7488100  | C | -1.1822070  | 9.6958160  | -6.2347990 |
| C | -0.2618260 | -4.7035170 | -3.4614210 | H | 3.8782120   | 2.3385090  | 4.0459350  | H | 0.1824840   | 8.8040390  | -7.6386120 |
| C | 0.1587850  | -5.8661100 | -2.7739980 | H | 3.5461210   | 0.2376870  | 2.8021100  | H | -2.5548460  | 10.3047890 | -4.6942390 |
| C | 0.2826940  | -5.8482280 | -1.3503460 | H | -0.0591950  | 0.3912980  | -3.5710380 | H | -1.1540100  | 10.6729780 | -6.7066510 |
| C | 0.3038360  | -2.2746420 | 0.6234110  | H | -0.0015700  | 2.6192860  | -4.6595210 | C | 7.7973870   | -0.5690040 | -0.7200900 |
| C | -0.6632100 | -2.2378090 | -0.6092640 | H | -2.7126440  | 4.1218840  | -1.6962470 | C | 8.9621790   | -0.4123650 | -1.0021600 |
| N | -0.3621530 | -1.0642310 | -1.4057020 | H | -2.7939260  | 1.9003560  | -0.6372980 | C | 2.1799960   | 4.3963280  | 4.1911460  |
| C | -1.4195630 | -0.3405350 | -1.4039850 | H | -4.2009710  | 0.2302510  | -2.3655800 | C | 2.3480540   | 5.4296740  | 4.7950470  |
| C | -2.5036390 | -1.0407070 | -0.6285470 | H | -6.5694180  | 0.7858440  | -1.9774020 | C | 10.3389580  | -0.2270320 | -1.3360840 |
| N | -2.0430830 | -2.1337150 | -0.1487900 | H | -6.3210870  | -0.8789300 | 1.9670640  | C | 10.8430750  | 1.0565810  | -1.5828010 |
| N | 0.1797550  | -1.0380840 | 1.3714090  | H | -3.9401500  | -1.4596890 | 1.5626590  | C | 11.2029160  | -1.3265660 | -1.4213000 |
| C | 1.3380080  | -0.4910430 | 1.3648710  | C | -1.5286290  | -6.6889420 | 3.7682700  | C | 12.1803670  | 1.2326300  | -1.9068270 |
| C | 2.2961990  | -1.3533570 | 0.5875670  | C | 0.4966370   | -7.0293790 | -3.5092970 | H | 10.1750570  | 1.9086970  | -1.5174120 |
| N | 1.6816370  | -2.3912510 | 0.1605720  | C | 0.9648470   | -6.9509940 | -0.7277870 | C | 12.5390580  | -1.1428490 | -1.7458150 |
| C | 3.7212100  | -1.1185170 | 0.2867270  | C | 1.2918490   | -8.0452850 | -1.4957170 | H | 10.8136890  | -2.3209760 | -1.2309180 |
| C | 1.5953160  | 0.7817350  | 2.0655880  | C | 1.0199860   | -8.1183740 | -2.8757980 | C | 13.0317410  | 0.1353170  | -1.9893120 |
| C | 4.5830560  | -2.2151660 | 0.1894820  | C | -1.9910580  | -6.6892800 | 0.9842920  | H | 12.5603950  | 2.2316820  | -2.0962080 |
| C | 5.5540390  | 0.3407310  | -0.3058170 | C | -2.4689140  | -7.6837160 | 1.8070970  | H | 13.1996360  | -2.0019080 | -1.8093040 |
| C | 6.4220250  | -0.7551890 | -0.3860880 | C | -2.2049200  | -7.7231860 | 3.1901180  | H | 14.0777220  | 0.2760440  | -2.2431780 |
| C | 5.9159610  | -2.0385410 | -0.1353660 | H | -1.3805860  | -6.6465700 | 4.8435870  | C | 2.5471480   | 6.6510430  | 5.5092160  |
| C | 4.2217230  | 0.1603810  | 0.0296160  | H | 0.3514460   | -7.0225500 | -4.5857900 | C | 3.7303860   | 6.8685950  | 6.2269850  |
| C | 0.6077010  | 1.7708330  | 2.0689320  | H | 1.8184240   | -8.8696610 | -1.0224940 | C | 1.5617060   | 7.6467230  | 5.5009270  |
| C | 0.7980900  | 2.9551970  | 2.7581740  | H | 1.2844810   | -9.0121820 | -3.4322230 | C | 3.9201990   | 8.0556280  | 6.9192380  |
| C | 1.9810050  | 3.1761730  | 3.4775660  | H | -3.1112240  | -8.4466730 | 1.3757310  | H | 4.4940360   | 6.0982790  | 6.2341390  |
| C | 2.9644290  | 2.1790190  | 3.4842660  | H | -2.5930900  | -8.5395100 | 3.7913190  | C | 1.7585350   | 8.8312460  | 6.1955140  |
| C | 2.7746940  | 0.9995230  | 2.7824980  | C | -7.9743160  | 0.3311740  | 0.2494150  | H | 0.6451430   | 7.4792430  | 4.9455430  |
| C | -1.4463080 | 0.9861030  | -2.0494710 | C | -9.1341710  | 0.6114210  | 0.4417960  | C | 2.9365400   | 9.0394820  | 6.9059230  |
| C | -3.9065880 | -0.6366760 | -0.4141960 | C | -1.3235230  | 4.8063850  | -3.8741360 | H | 4.8407570   | 8.2139380  | 7.4722690  |
| C | -0.6518120 | 1.2100960  | -3.1784980 | C | -1.2918560  | 5.8944610  | -4.3993870 | H | 0.9884440   | 9.5961830  | 6.1825340  |
| C | -0.6133080 | 2.4552390  | -3.7791940 | C | -10.5053730 | 0.9420960  | 0.6695640  | H | 3.0877930   | 9.9673500  | 7.4485870  |
| C | -1.3604240 | 3.5205170  | -3.2558600 | C | -11.2580450 | 1.5756960  | -0.3277580 | C | 1.4693140   | -6.9405320 | 0.6977710  |
| C | -2.1413590 | 3.3006150  | -2.1147190 | C | -11.1150790 | 0.6368330  | 1.8933750  | H | 1.7232390   | -5.9339100 | 1.0344140  |
| C | -2.1859700 | 2.0483330  | -1.5225390 | C | -12.5891080 | 1.8951100  | -0.1028730 | H | 0.7469240   | -7.3521520 | 1.4062690  |
| C | -4.6568690 | -0.0073770 | -1.4106830 | H | -10.7871720 | 1.8121360  | -1.2759160 | H | 2.3742840   | -7.5516690 | 0.7588470  |
| C | -5.9899430 | 0.3046930  | -1.1972010 | C | -12.4465890 | 0.9593130  | 2.1111150  | C | -2.4963300  | -6.6779890 | -0.4409350 |
| C | -6.6041060 | 0.0001600  | 0.0240350  | H | -10.5334180 | 0.1458300  | 2.6661440  | H | -2.6062630  | -5.6633450 | -0.8273640 |
| C | -5.8505770 | -0.6364520 | 1.0205320  | C | -13.1870770 | 1.5885910  | 1.1154100  | H | -1.8444160  | -7.2242260 | -1.1264280 |
| C | -4.5226150 | -0.9554110 | 0.7997160  | H | -13.1632050 | 2.3857360  | -0.8826650 | H | -3.4800120  | -7.1548140 | -0.4725550 |
| H | 0.2836380  | -2.5095460 | 3.3494730  | H | -12.9091800 | 0.7180040  | 3.0630250  |   |             |            |            |

SCF Done: E(RCAM-B3LYP) = -3449.09271594 A.U.

Low frequencies --- -0.2489 -0.0022 -0.0017 -0.0007 0.2898 0.6253  
 Zero-point correction = 1.114259 (Hartree/Particle)  
 Thermal correction to Energy = 1.183882  
 Thermal correction to Enthalpy = 1.184826  
 Thermal correction to Gibbs Free Energy = 0.990049  
 Sum of electronic and zero-point Energies = -3447.978456  
 Sum of electronic and thermal Energies = -3447.908834  
 Sum of electronic and thermal Enthalpies = -3447.907890  
 Sum of electronic and thermal Free Energies = -3448.102667

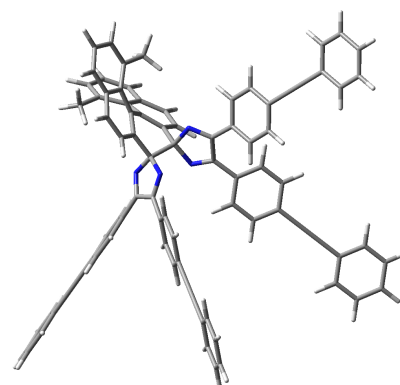

**Table S22.** Standard Orientation of the Optimized Geometry for BR of 4.

|   | X          | Y          | Z          |   | X          | Y          | Z          |   | X           | Y          | Z          |
|---|------------|------------|------------|---|------------|------------|------------|---|-------------|------------|------------|
| C | 0.8364440  | -3.4085540 | 2.1483480  | H | 2.4645260  | -4.6997630 | 2.5832360  | H | 12.9372550  | -5.5444450 | -2.2806640 |
| C | 1.9261200  | -3.7954570 | 2.8527040  | H | -0.3224920 | 3.0355810  | 2.8496940  | C | 4.7352330   | 7.7713480  | -4.7775950 |
| C | 2.3934500  | -3.0386780 | 3.9594480  | H | -2.2118120 | 3.1023540  | 4.4404320  | C | 4.5037770   | 9.1288790  | -4.5197180 |
| C | 1.7157560  | -1.8426590 | 4.3525720  | H | -4.1303430 | -0.2032130 | -1.2938880 | C | 5.3446840   | 7.4008100  | -5.9835150 |
| C | 0.5477840  | -1.4586640 | 3.6005160  | H | -5.9647490 | 1.4321730  | -1.3998140 | C | 4.8745320   | 10.0903600 | -5.4483030 |
| C | 0.1168970  | -2.2346170 | 2.5143790  | H | -5.8989320 | 1.7938900  | 2.8741400  | H | 4.0316950   | 9.4169280  | -3.5865740 |
| C | -0.2127450 | -0.2046230 | 3.9083720  | H | -4.0384000 | 0.1617470  | 2.9780910  | C | 5.7126550   | 8.3679080  | -6.9073640 |
| C | 0.1338720  | 0.9631490  | 3.2131700  | H | -1.2096660 | -3.4599180 | -1.8850880 | H | 5.5240800   | 6.3500680  | -6.1844240 |
| C | -0.6111400 | 2.1598720  | 3.4153010  | H | -2.2269330 | -4.5797990 | -3.8514780 | C | 5.4793090   | 9.7139100  | -6.6434420 |
| C | -1.6455750 | 2.1883920  | 4.2865940  | H | -6.1284940 | -3.5388560 | -2.4061150 | H | 4.6904090   | 11.1393600 | -5.2384100 |
| C | -2.0235480 | 1.0308950  | 5.0158480  | H | -5.1153330 | -2.4143980 | -0.4663320 | H | 6.1840230   | 8.0697420  | -7.8386390 |
| C | -1.3140650 | -0.1983020 | 4.8387700  | H | 2.1797860  | 4.6336260  | 0.9890440  | H | 5.7682400   | 10.4685130 | -7.3682930 |
| C | -1.0514510 | -1.9491320 | 1.7016930  | H | 2.8489990  | 6.3639290  | -0.6577410 | C | -7.1343590  | 2.6600250  | 0.6658440  |
| C | 1.2315510  | 1.0725670  | 2.2705580  | H | 4.3406090  | 3.2934750  | -3.2543760 | C | -8.0385730  | 3.4609280  | 0.6125790  |
| N | 1.4139400  | 2.2315020  | 1.5582540  | H | 3.6911180  | 1.5813790  | -1.6108860 | C | -4.8378640  | -4.7740240 | -4.3938670 |
| C | 2.4723880  | 2.0073860  | 0.8060410  | H | 5.3803410  | 1.7036810  | 0.3204090  | C | -5.3367200  | -5.3241010 | -5.3479190 |
| C | 2.9774850  | 0.6560890  | 1.1216200  | H | 7.3825190  | 0.4436410  | -0.3525370 | C | -9.1067430  | 4.4070110  | 0.5482520  |
| N | 2.1637990  | 0.1149200  | 2.0125650  | H | 5.2902410  | -3.2436830 | 0.2982010  | C | -9.6385410  | 4.7942710  | -0.6888000 |
| N | -1.3126980 | -2.7012110 | 0.5836960  | H | 3.2784040  | -1.9730570 | 0.9930860  | C | -9.6369600  | 4.9602880  | 1.7211940  |
| C | -2.4406360 | -2.2182320 | 0.1026140  | C | 3.5368580  | -3.4966570 | 4.6486300  | C | -10.6759370 | 5.7132600  | -0.7474730 |
| C | -2.8610780 | -1.0966980 | 0.9669040  | C | -3.1200110 | 1.1263160  | 5.9006870  | H | -9.2286350  | 4.3670150  | -1.5976560 |
| N | -1.9821510 | -0.9880370 | 1.9488470  | C | -1.7712620 | -1.3353320 | 5.6032640  | C | -10.6744440 | 5.8786460  | 1.6547270  |
| C | -3.9785370 | -0.1635390 | 0.8575630  | C | -2.8495130 | -1.1801370 | 6.4496410  | H | -9.2260710  | 4.6613180  | 2.6795270  |
| C | -3.0842370 | -2.8310790 | -1.0587140 | C | -3.5329420 | 0.0354720  | 6.6105020  | C | -11.1967910 | 6.2577940  | 0.4221550  |
| C | -4.4780580 | 0.4331300  | 2.0254170  | C | 2.2621470  | -1.1177660 | 5.4754340  | H | -11.0802470 | 6.0064230  | -1.7112950 |
| C | -5.5542690 | 1.1392380  | -0.4397170 | C | 3.3817910  | -1.6155640 | 6.1084030  | H | -11.0777360 | 6.3010570  | 2.5697750  |
| C | -6.0686070 | 1.7148000  | 0.7299340  | C | 4.0280120  | -2.7972910 | 5.7129050  | H | -12.0085750 | 6.9767680  | 0.3731600  |
| C | -5.5110790 | 1.3479480  | 1.9646970  | H | 4.0131680  | -4.4121710 | 4.3104170  | C | -5.9266810  | -5.9739700 | -6.4748670 |
| C | -4.5272720 | 0.2136340  | -0.3757420 | H | -3.6221700 | 2.0842880  | 6.0000150  | C | -7.3191710  | -6.0088250 | -6.6255910 |
| C | -2.2853140 | -3.4702340 | -2.0178100 | H | -3.1847850 | -2.0422160 | 7.0179110  | C | -5.1205640  | -6.5850550 | -7.4442480 |
| C | -2.8540410 | -4.0986750 | -3.1088090 | H | -4.3751000 | 0.0979370  | 7.2925830  | C | -7.8885030  | -6.6408530 | -7.7212990 |
| C | -4.2479820 | -4.1251240 | -3.2692100 | H | 3.7840110  | -1.0623160 | 6.9514440  | H | -7.9443050  | -5.5362250 | -5.8756170 |
| C | -5.0496340 | -3.5069780 | -2.3004680 | H | 4.9071980  | -3.1400400 | 6.2493200  | C | -5.6970470  | -7.2151490 | -8.5373300 |
| C | -4.4760050 | -2.8690510 | -1.2139770 | C | 7.6317730  | -2.2142880 | -0.4805160 | H | -4.0423620  | -6.5587840 | -7.3285550 |
| C | 2.9187500  | 2.9940190  | -0.1764880 | C | 8.6157070  | -2.8325690 | -0.8144300 | C | -7.0807770  | -7.2452320 | -8.6794900 |
| C | 4.1737240  | -0.0498910 | 0.6717730  | C | 4.0327520  | 5.9376570  | -3.0169060 | H | -8.9685390  | -6.6620640 | -7.8282180 |
| C | 2.6689210  | 4.3529230  | 0.0635090  | C | 4.3548240  | 6.7783980  | -3.8238110 | H | -5.0631220  | -7.6854680 | -9.2825100 |
| C | 3.0364260  | 5.3145650  | -0.8577390 | C | 9.7785150  | -3.5622720 | -1.2089510 | H | -7.5290980  | -7.7391130 | -9.5358780 |
| C | 3.6528300  | 4.9471460  | -2.0638190 | C | 10.9522140 | -2.8871160 | -1.5690550 | C | -1.1646360  | -2.7192240 | 5.5723380  |
| C | 3.8826430  | 3.5882680  | -2.3165740 | C | 9.7609100  | -4.9628860 | -1.2411140 | H | -1.1925630  | -3.1683540 | 4.5783670  |
| C | 3.5223530  | 2.6281480  | -1.3866870 | C | 12.0795510 | -3.5991190 | -1.9516140 | H | -0.1241810  | -2.7283710 | 5.9018900  |
| C | 5.3464660  | 0.6208120  | 0.2976830  | H | 10.9672420 | -1.8027860 | -1.5444090 | H | -1.7267940  | -3.3716040 | 6.2448940  |
| C | 6.4773140  | -0.0848730 | -0.0742820 | C | 10.8920640 | -5.6681690 | -1.6248470 | C | 1.7132110   | 0.1711990  | 6.0419660  |
| C | 6.4703580  | -1.4862710 | -0.0873240 | H | 8.8528270  | -5.4867830 | -0.9626750 | H | 1.7057740   | 0.9791350  | 5.3086830  |
| C | 5.3010330  | -2.1591010 | 0.2994220  | C | 12.0535540 | -4.9899140 | -1.9808600 | H | 0.6940840   | 0.0669410  | 6.4185040  |
| C | 4.1766770  | -1.4530150 | 0.6810060  | H | 12.9836230 | -3.0658510 | -2.2284760 | H | 2.3402320   | 0.4902920  | 6.8780580  |
| H | 0.4735080  | -3.9800350 | 1.3042640  | H | 10.8673060 | -6.7532080 | -1.6462720 |   |             |            |            |

SCF Done: E(UCAM-B3LYP) = -3449.08399979 A.U.  
 S\*\*2 before annihilation 1.1248, after 1.0550

Low frequencies --- -0.8193 -0.4288 -0.0033 -0.0022 -0.0017 0.6428  
 Zero-point correction = 1.111075 (Hartree/Particle)  
 Thermal correction to Energy = 1.181717  
 Thermal correction to Enthalpy = 1.182661  
 Thermal correction to Gibbs Free Energy = 0.983137  
 Sum of electronic and zero-point Energies = -3447.972925  
 Sum of electronic and thermal Energies = -3447.902283  
 Sum of electronic and thermal Enthalpies = -3447.901338  
 Sum of electronic and thermal Free Energies = -3448.100863

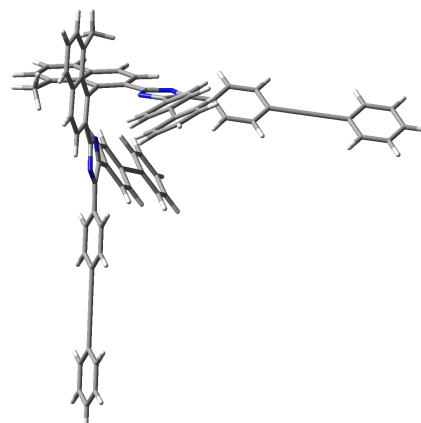

**Table S23.** Standard Orientation of the Optimized Geometry for TS1 of 4.

|   | X          | Y          | Z          |   | X           | Y          | Z          |   | X           | Y          | Z          |
|---|------------|------------|------------|---|-------------|------------|------------|---|-------------|------------|------------|
| C | -2.1506500 | -3.3044410 | 2.7521500  | H | -3.7019430  | -3.9666430 | 4.0557690  | H | -13.2140170 | 4.6459270  | -0.7334540 |
| C | -3.1665170 | -4.1334470 | 3.1255430  | H | 0.4148930   | -3.3187770 | -3.0646280 | C | 2.1897380   | 6.9481660  | -3.5802550 |
| C | -3.5829420 | -5.1912650 | 2.2848710  | H | 1.2294690   | -5.5932870 | -3.6128180 | C | 3.3240850   | 7.0190290  | -4.3994470 |
| C | -2.9096880 | -5.4279940 | 1.0448370  | H | 3.0497300   | 0.2168710  | 0.0822230  | C | 1.6060580   | 8.1353230  | -3.1190110 |
| C | -1.7095980 | -4.6806140 | 0.7900720  | H | 5.4586470   | 0.2465920  | -0.4376080 | C | 3.8592920   | 8.2504800  | -4.7475710 |
| C | -1.4082140 | -3.5832100 | 1.5848390  | H | 5.8453560   | -3.7400030 | 1.0954600  | H | 3.7766450   | 6.1003810  | -4.7570480 |
| C | -0.7888200 | -4.9733520 | -0.3445350 | H | 3.4168560   | -3.7721200 | 1.6018420  | C | 2.1470900   | 9.3630970  | -3.4710510 |
| C | -0.5231640 | -3.9361940 | -1.2276490 | H | -1.0918180  | 1.1887460  | 1.5585190  | H | 0.7286330   | 8.0813500  | -2.4836180 |
| C | 0.2346500  | -4.1525900 | -2.3972040 | H | -0.8041210  | 3.5217180  | 2.3505810  | C | 3.2735660   | 9.4248260  | -4.2853330 |
| C | 0.6984630  | -5.4013180 | -2.6850430 | H | 3.2298200   | 2.6178870  | 3.4924210  | H | 4.7382870   | 8.2942620  | -5.3830010 |
| C | 0.5542410  | -6.4576610 | -1.7566970 | H | 2.9466730   | 0.3120660  | 2.6913980  | H | 1.6875540   | 10.2769200 | -3.1076790 |
| C | -0.1235760 | -6.2346220 | -0.5164150 | H | 1.2082350   | 0.0093270  | -2.8894250 | H | 3.6947070   | 10.3870880 | -4.5591820 |
| C | -0.3659930 | -2.6027200 | 1.2000900  | H | 2.1675450   | 2.2071630  | -3.5202160 | C | 7.2148120   | -1.7179730 | 0.0074520  |
| C | -0.9446730 | -2.5447150 | -0.9440940 | H | -1.0569530  | 4.1786940  | -1.4939760 | C | 8.3968710   | -1.7021170 | -0.2449930 |
| N | -0.1776630 | -1.5069880 | -1.4240990 | H | -2.0167330  | 1.9999420  | -0.8874790 | C | 1.4047610   | 4.5696010  | 3.4312910  |
| C | -0.9851260 | -0.4793470 | -1.5024610 | H | -3.2968760  | 0.9523200  | -2.8565390 | C | 1.5437130   | 5.7029890  | 3.8283880  |
| C | -2.3495460 | -0.9336330 | -1.1098200 | H | -5.4979180  | 2.0584480  | -2.7810290 | C | 9.7938590   | -1.6837690 | -0.5433480 |
| N | -2.2860770 | -2.1876530 | -0.7716670 | H | -6.4807270  | -0.1266260 | 0.7763060  | C | 10.5925000  | -2.8023160 | -0.2715170 |
| N | -0.5262380 | -1.2917390 | 1.5958530  | H | -4.2680380  | -1.2521410 | 0.6872790  | C | 10.3839330  | -0.5472270 | -1.1116150 |
| C | 0.6782460  | -0.7786670 | 1.5994080  | C | -4.6900700  | -5.9864530 | 2.6711020  | C | 11.9486810  | -2.7810670 | -0.5624030 |
| C | 1.6365480  | -1.8430640 | 1.1847240  | C | 1.1161490   | -7.7229890 | -2.0575650 | H | 10.1368640  | -3.6830330 | 0.1681730  |
| N | 0.9732480  | -2.9454490 | 0.9963850  | C | -0.0480360  | -7.2782880 | 0.4760160  | C | 11.7407890  | -0.5332350 | -1.3998090 |
| C | 3.0779310  | -1.7702950 | 0.9158880  | C | 0.5268120   | -8.4799500 | 0.1314610  | H | 9.7667460   | 0.3194880  | -1.3226250 |
| C | 0.9126040  | 0.5985530  | 2.0319730  | C | 1.0764440   | -8.7311130 | -1.1407950 | C | 12.5267860  | -1.6482960 | -1.1266660 |
| C | 3.8779740  | -2.8891710 | 1.1739020  | C | -3.5139700  | -6.3668850 | 0.1322530  | H | 12.5580000  | -3.6534320 | -0.3477010 |
| C | 5.0141420  | -0.6272910 | 0.0260090  | C | -4.5998490  | -7.0975440 | 0.5567730  | H | 12.1875520  | 0.3527620  | -1.8400710 |
| C | 5.8197380  | -1.7382630 | 0.3071370  | C | -5.1731920  | -6.9484160 | 1.8345920  | H | 13.5882900  | -1.6345520 | -1.3532710 |
| C | 5.2297010  | -2.8727440 | 0.8832800  | H | -5.1509620  | -5.7978840 | 3.6364540  | C | 1.7085840   | 7.0416480  | 4.2985380  |
| C | 3.6625360  | -0.6433700 | 0.3280080  | H | 1.5920580   | -7.8608890 | -3.0241570 | C | 0.6390610   | 7.9456470  | 4.2559810  |
| C | -0.1435050 | 1.5191990  | 1.9651280  | H | 0.5872990   | -9.2577290 | 0.8875160  | C | 2.9417640   | 7.4677580  | 4.8090130  |
| C | 0.0160400  | 2.8150460  | 2.4150650  | H | 1.5058890   | -9.7032920 | -1.3618560 | C | 0.8026910   | 9.2446490  | 4.7141980  |
| C | 1.2380680  | 3.2327880  | 2.9639290  | H | -5.0546030  | -7.7964260 | -0.1395380 | H | -0.3163050  | 7.6164870  | 3.8615970  |
| C | 2.2879010  | 2.3093100  | 3.0525440  | H | -6.0219080  | -7.5616180 | 2.1210990  | C | 3.0979440   | 8.7683620  | 5.2652670  |
| C | 2.1271100  | 1.0133390  | 2.5934720  | C | -7.4062000  | 1.6962880  | -0.9464150 | H | 3.7704550   | 6.7686770  | 4.8422870  |
| C | -0.4833530 | 0.8453750  | -1.8717090 | C | -8.4831330  | 2.2439360  | -0.9072090 | C | 2.0307170   | 9.6598610  | 5.2195690  |
| C | -3.6253920 | -0.2084480 | -1.0702760 | C | 1.1654910   | 4.6106600  | -2.9150380 | H | -0.0326840  | 9.9368550  | 4.6772540  |
| C | 0.7127700  | 0.9292370  | -2.6013900 | C | 1.6354340   | 5.6819000  | -3.2201530 | H | 4.0576970   | 9.0881910  | 5.6588380  |
| C | 1.2491190  | 2.1542470  | -2.9457380 | C | -9.7562130  | 2.8904640  | -0.8605530 | H | 2.1558160   | 10.6769360 | 5.5776530  |
| C | 0.6141360  | 3.3449730  | -2.5582630 | C | -10.6632960 | 2.5984380  | 0.1664630  | C | -0.4662870  | -7.1207980 | 1.9203430  |
| C | -0.5682130 | 3.2646260  | -1.8126520 | C | -10.1144830 | 3.8248440  | -1.8410510 | H | -0.2370320  | -6.1270030 | 2.3080160  |
| C | -1.1088370 | 2.0343660  | -1.4766970 | C | -11.8985980 | 3.2281280  | 0.2086970  | H | -1.5337990  | -7.2936720 | 2.0731690  |
| C | -3.9848910 | 0.7234140  | -2.0498620 | H | -10.3872630 | 1.8747880  | 0.9258860  | H | 0.0751530   | -7.8496640 | 2.5294290  |
| C | -5.2225300 | 1.3436430  | -2.0133420 | C | -11.3515810 | 4.4505350  | -1.7923580 | C | -3.1069980  | -6.5399540 | -1.3133060 |
| C | -6.1347590 | 1.0500820  | -0.9911300 | H | -9.4132890  | 4.0513850  | -2.6370640 | H | -2.8286130  | -5.5918220 | -1.7758670 |
| C | -5.7772940 | 0.1085660  | -0.0149250 | C | -12.2465560 | 4.1549290  | -0.7689240 | H | -2.2662890  | -7.2258110 | -1.4378090 |
| C | -4.5441960 | -0.5160180 | -0.0595250 | H | -12.5939060 | 2.9941720  | 1.0088060  | H | -3.9515040  | -6.9492140 | -1.8741680 |
| H | -1.8789880 | -2.4425420 | 3.3492590  | H | -11.6190640 | 5.1726730  | -2.5574420 |   |             |            |            |

SCF Done: E(UCAM-B3LYP) = -3449.05372111 A.U.  
 S\*\*2 before annihilation 0.4197, after 0.0791

Low frequencies --- -637.2836 -1.1339 -0.4508 -0.0028 0.0008 0.0016  
 \*\*\*\*\* 1 imaginary frequencies (negative Signs) \*\*\*\*\*  
 Zero-point correction = 1.110917 (Hartree/Particle)  
 Thermal correction to Energy = 1.180725  
 Thermal correction to Enthalpy = 1.181669  
 Thermal correction to Gibbs Free Energy = 0.986846  
 Sum of electronic and zero-point Energies = -3447.942804  
 Sum of electronic and thermal Energies = -3447.872997  
 Sum of electronic and thermal Enthalpies = -3447.872052  
 Sum of electronic and thermal Free Energies = -3448.066875

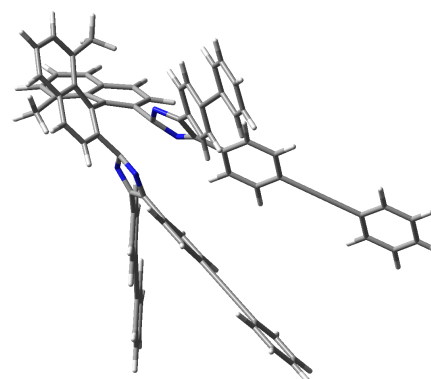



**Table S24.** Standard Orientation of the Optimized Geometry for TS2 of 4.

|   | X          | Y          | Z          |   | X          | Y          | Z          |   | X           | Y           | Z          |
|---|------------|------------|------------|---|------------|------------|------------|---|-------------|-------------|------------|
| C | 0.0999190  | 3.8290520  | 2.4903410  | H | -1.2702650 | 5.2916590  | 3.2045480  | H | -8.6204880  | 9.8313430   | -4.3390710 |
| C | -0.9186350 | 4.2663310  | 3.2725490  | H | -0.6341880 | -2.9594710 | 2.7287950  | C | -8.4355520  | -5.9099960  | -3.3406730 |
| C | -1.5533360 | 3.4040070  | 4.2084790  | H | 1.2399360  | -3.5812690 | 4.2015770  | C | -8.9171760  | -7.0898270  | -2.7585800 |
| C | -1.1352170 | 2.0405000  | 4.3652930  | H | 2.9582860  | -0.7220790 | -1.4537940 | C | -8.8619710  | -5.5616220  | -4.6289340 |
| C | -0.0575740 | 1.6045210  | 3.5117190  | H | 3.6829140  | -2.9984070 | -2.0763400 | C | -9.8046010  | -7.8998860  | -3.4517270 |
| C | 0.5066930  | 2.4840240  | 2.6024760  | H | 4.3258900  | -3.9216580 | 2.0602540  | H | -8.5873080  | -7.3606580  | -1.7613690 |
| C | 0.5226230  | 0.2129990  | 3.4891670  | H | 3.6101930  | -1.6400930 | 2.6777270  | C | -9.7495280  | -6.3766960  | -5.3160070 |
| C | -0.3285660 | -0.8400080 | 2.9401090  | H | 3.4238750  | 3.7548020  | -0.9881270 | H | -8.4893320  | -4.6485880  | -5.0807070 |
| C | -0.0168720 | -2.2071450 | 3.2010340  | H | 5.2833610  | 4.3904350  | -2.5040580 | C | -10.2231860 | -7.5467020  | -4.7307330 |
| C | 1.0104780  | -2.5375920 | 4.0089970  | H | 7.3665590  | 0.8015940  | -1.4226990 | H | -10.1714960 | -8.8120070  | -2.9915690 |
| C | 1.8252670  | -1.5462370 | 4.6527240  | H | 5.5254570  | 0.1805370  | 0.0841430  | H | -10.0733280 | -6.0976250  | -6.3137980 |
| C | 1.6061010  | -0.1576830 | 4.4222290  | H | -4.1646420 | -3.3461250 | 1.6405370  | H | -10.9175430 | -8.1826540  | -5.2708480 |
| C | 1.5153680  | 1.9325000  | 1.7419110  | H | -5.7608750 | -4.7978060 | 0.4172450  | C | 4.4738820   | -4.9352550  | -0.4090050 |
| C | -1.4077770 | -0.5875370 | 2.0786630  | H | -5.6733930 | -2.0762880 | -2.8960260 | C | 4.8310940   | -6.0492450  | -0.7131090 |
| N | -2.1973010 | -1.6301090 | 1.6169170  | H | -4.1055950 | -0.6276950 | -1.6711600 | C | 7.5206250   | 2.9932210   | -2.9456880 |
| C | -3.0747580 | -1.0685930 | 0.8279350  | H | -5.4889310 | 0.5482100  | 0.1838780  | C | 8.4283760   | 3.2980260   | -3.6840970 |
| C | -2.8255180 | 0.3957490  | 0.8230810  | H | -6.6475460 | 2.4589340  | -0.8443350 | C | 5.2532670   | -7.3653760  | -1.0751820 |
| N | -1.7870030 | 0.6369640  | 1.5841590  | H | -2.9534800 | 4.6338990  | -0.9851440 | C | 5.2564930   | -7.7661320  | -2.4176890 |
| N | 2.4010850  | 2.5799090  | 0.9915260  | H | -1.7918680 | 2.7156920  | 0.0727160  | C | 5.6702050   | -8.2737280  | -0.0933970 |
| C | 3.2225060  | 1.5980720  | 0.5360860  | C | -2.5975390 | 3.9407780  | 4.9942460  | C | 5.6672030   | -9.0446140  | -2.7659460 |
| C | 2.7794980  | 0.3364330  | 1.0223800  | C | 2.8256030  | -1.9917040 | 5.5283420  | H | 4.9339580   | -7.0643910  | -3.1793530 |
| N | 1.6666000  | 0.5820170  | 1.7399160  | C | 2.4465410  | 0.7685510  | 5.1140480  | C | 6.0796880   | -9.5506030  | -0.4489400 |
| C | 3.2231410  | -1.0229410 | 0.6583260  | C | 3.4205620  | 0.2719510  | 5.9740870  | H | 5.6687710   | -7.9652770  | 0.9465870  |
| C | 4.3287700  | 1.9170810  | -0.3650190 | C | 3.6231320  | -1.0886110 | 6.1897910  | C | 6.0797270   | -9.9403230  | -1.7845160 |
| C | 3.6129730  | -1.9405040 | 1.6366780  | C | -1.7986650 | 1.2658410  | 5.3826950  | H | 5.6653330   | -9.3437540  | -3.8094990 |
| C | 3.6655430  | -2.6987640 | -1.0340360 | C | -2.8071730 | 1.8503530  | 6.1193930  | H | 6.4008170   | -10.2457120 | 0.3206480  |
| C | 4.0525320  | -3.6188010 | -0.0498970 | C | -3.2256090 | 3.1768090  | 5.9343690  | H | 6.4006590   | -10.9400690 | -2.0599780 |
| C | 4.0211480  | -3.2197370 | 1.2911880  | H | -2.8831940 | 4.9760520  | 4.8330740  | C | 9.5009040   | 3.6574640   | -4.5561520 |
| C | 3.2591720  | -1.4230990 | -0.6823370 | H | 2.9517410  | -3.0602240 | 5.6750000  | C | 10.6146550  | 2.8188140   | -4.6963750 |
| C | 4.2888330  | 3.1113040  | -1.0990030 | H | 4.0529690  | 0.9842210  | 6.4939690  | C | 9.4548590   | 4.8538740   | -5.2841020 |
| C | 5.3277260  | 3.4654330  | -1.9390300 | H | 4.3983480  | -1.4241960 | 6.8710900  | C | 11.6544840  | 3.1711140   | -5.5443060 |
| C | 6.4491000  | 2.6340320  | -2.0753900 | H | -3.2965000 | 1.2524700  | 6.8825720  | H | 10.6521870  | 1.8921320   | -4.1337970 |
| C | 6.4973700  | 1.4445940  | -1.3352910 | H | -4.0274410 | 3.5838440  | 6.5419930  | C | 10.4983600  | 5.1996840   | -6.1301910 |
| C | 5.4567650  | 1.0948260  | -0.4931710 | C | -5.5522100 | 4.7773400  | -1.5975920 | H | 8.5935800   | 5.5045270   | -5.1768790 |
| C | -4.0498000 | -1.8743710 | 0.0867980  | C | -6.1215430 | 5.7148070  | -2.1061170 | C | 11.6004820  | 4.3610040   | -6.2633690 |
| C | -3.5475170 | 1.4876790  | 0.1679640  | C | -6.7477330 | -4.3648550 | -2.0293520 | H | 12.5121670  | 2.5131920   | -5.6446850 |
| C | -4.5137850 | -3.0690830 | 0.6524200  | C | -7.5215080 | -5.0732280 | -2.6300390 | H | 10.4513720  | 6.1292450   | -6.6890070 |
| C | -5.3982770 | -3.8802170 | -0.0330300 | C | -6.7941420 | 6.8225140  | -2.7069980 | H | 12.4156370  | 4.6341460   | -6.9261840 |
| C | -5.8352080 | -3.5295690 | -1.3192290 | C | -8.1736280 | 6.7706390  | -2.9462640 | C | 2.4096080   | 2.2718440   | 4.9875010  |
| C | -5.3552120 | -2.3461390 | -1.8950630 | C | -6.0829090 | 7.9753240  | -3.0649330 | H | 2.6841440   | 2.6046960   | 3.9836200  |
| C | -4.4778450 | -1.5303670 | -1.2006900 | C | -8.8232310 | 7.8483900  | -3.5299120 | H | 1.4282600   | 2.6927620   | 5.2115470  |
| C | -4.9232750 | 1.4319520  | -0.0869570 | H | -8.7252880 | 5.8786210  | -2.6695130 | H | 3.1278100   | 2.7081510   | 5.6853810  |
| C | -5.5801230 | 2.5079790  | -0.6592330 | C | -6.7393020 | 9.0491090  | -3.6482940 | C | -1.4852890  | -0.1699890  | 5.7282370  |
| C | -4.8785480 | 3.6722950  | -0.9982200 | H | -5.0147960 | 8.0164480  | -2.8804590 | H | -1.8679780  | -0.8686910  | 4.9807770  |
| C | -3.5022160 | 3.7334700  | -0.7315320 | C | -8.1095140 | 8.9895280  | -3.8823980 | H | -0.4170110  | -0.3579440  | 5.8391740  |
| C | -2.8513020 | 2.6624780  | -0.1499830 | H | -9.8923660 | 7.7977330  | -3.7108360 | H | -1.9581810  | -0.4247770  | 6.6798950  |
| H | 0.6063250  | 4.4681750  | 1.7756170  | H | -6.1786080 | 9.9374010  | -3.9219430 |   |             |             |            |

SCF Done: E(UCAM-B3LYP) = -3449.05119886 A.U.  
 S\*\*2 before annihilation 0.5145, after 0.1782

Low frequencies ----1279.6855 -0.0029 -0.0020 -0.0012 0.6296 0.8536  
 \*\*\*\*\* 1 imaginary frequencies (negative Signs) \*\*\*\*\*  
 Zero-point correction = 1.110100 (Hartree/Particle)  
 Thermal correction to Energy = 1.180148  
 Thermal correction to Enthalpy = 1.181092  
 Thermal correction to Gibbs Free Energy = 0.984485  
 Sum of electronic and zero-point Energies = -3447.941099  
 Sum of electronic and thermal Energies = -3447.871051  
 Sum of electronic and thermal Enthalpies = -3447.870107  
 Sum of electronic and thermal Free Energies = -3448.066714

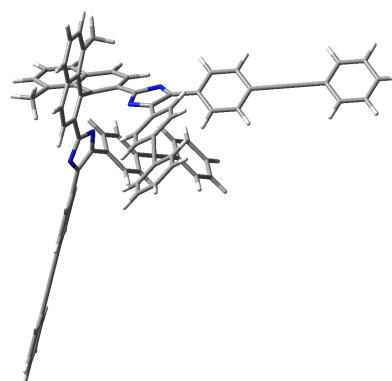

## 12. References

- S1. Swain, A.; Kolanji, K.; Stapper, C.; Ravat, P. *Org. Lett.* **2021**, *23*, 1339–1343.
- S2. Hatano, S.; Horino, T.; Tokita, A.; Oshima, T.; Abe, J. *J. Am. Chem. Soc.* **2013**, *135*, 3164–3172.
- S3. Torozova, A. S.; Korolkova, A. A.; Krasnova, I. Yu.; Shifrina, Z. B. *Russ. Chem. Bull., Int. Ed.* **2020**, *69*, 91–96.
- S4. (a) Sheldrick GM. SHELXS-97 and SHELXL-97; University of Gottingen, Germany, 1997.  
(b) Sheldrick GM. SADABS; University of Gottingen, Germany, 1996.
- S5. M. Hanazawa, R. Sumiya, Y. Horikawa and M. Irie, *J. Chem. Soc., Chem. Commun.*, 1992, 206–207.
- S6. Gaussian16 program (Revision B.01), Frisch, M. J.; Trucks, G. W.; Schlegel, H. B.; Scuseria, G. E.; Robb, M. A.; Cheeseman, J. R.; Scalmani, G.; Barone, V.; Mennucci, B.; Petersson, G. A.; Nakatsuji, H.; Li, X.; Caricato, M.; Marenich, A. V.; Bloino, J.; Janesko, B. G.; Gomperts, R.; Mennucci, B.; Hratchian, H. P.; Ortiz, J. V.; Izmaylov, A. F.; Onnenberg, J. L.; Williams-Young, D.; Ding, F.; Lipparini, F.; Egidi, F.; Goings, J.; Peng, B.; Petrone, A.; Henderson, T.; Ranasinghe, D.; Zakrewski, V. G.; Gao, J.; Rega, N.; Zheng, G.; Liang, W.; Hada, M.; Ehara, M.; Toyota, K.; Fukuda, R.; Hasegawa, J.; Ishida, M.; Nakajima, T.; Honda, Y.; Kitao, O.; Nakai, H.; Vreven, T.; Throssell, K.; Montgomery, J. A., Jr.; Peralta, J. E.; Ogliaro, F.; Bearpark, M.; Heyd, J. J.; Brothers, E.; Kudin, K. N.; Staroverov, V. N.; Keith, T. A.; Kobayashi, R.; Normand, J.; Raghavachari, K.; Rendell, A.; Burant, J. C.; Iyengar, S. S.; Tomasi, J.; Cossi, M.; Millam, N. J.; Klene, M.; Adamo, C.; Cammi, R.; Ochterski, J. W.; Martin, R. L.; Morokuma, K.; Farkas, Ö.; Foresman, J. B.; Fox, D. J. Gaussian 16, Revision B.01; Gaussian, Inc.: Wallingford CT, 2016.
